# Supplementary material for: Tobacco Smoking Leads to Extensive Genome-Wide Changes in DNA Methylation
Source: PubMed Central journal article supplement (PMC3656907; doi:10.1371/journal.pone.0063812), 2013-05-17

# cg00871610

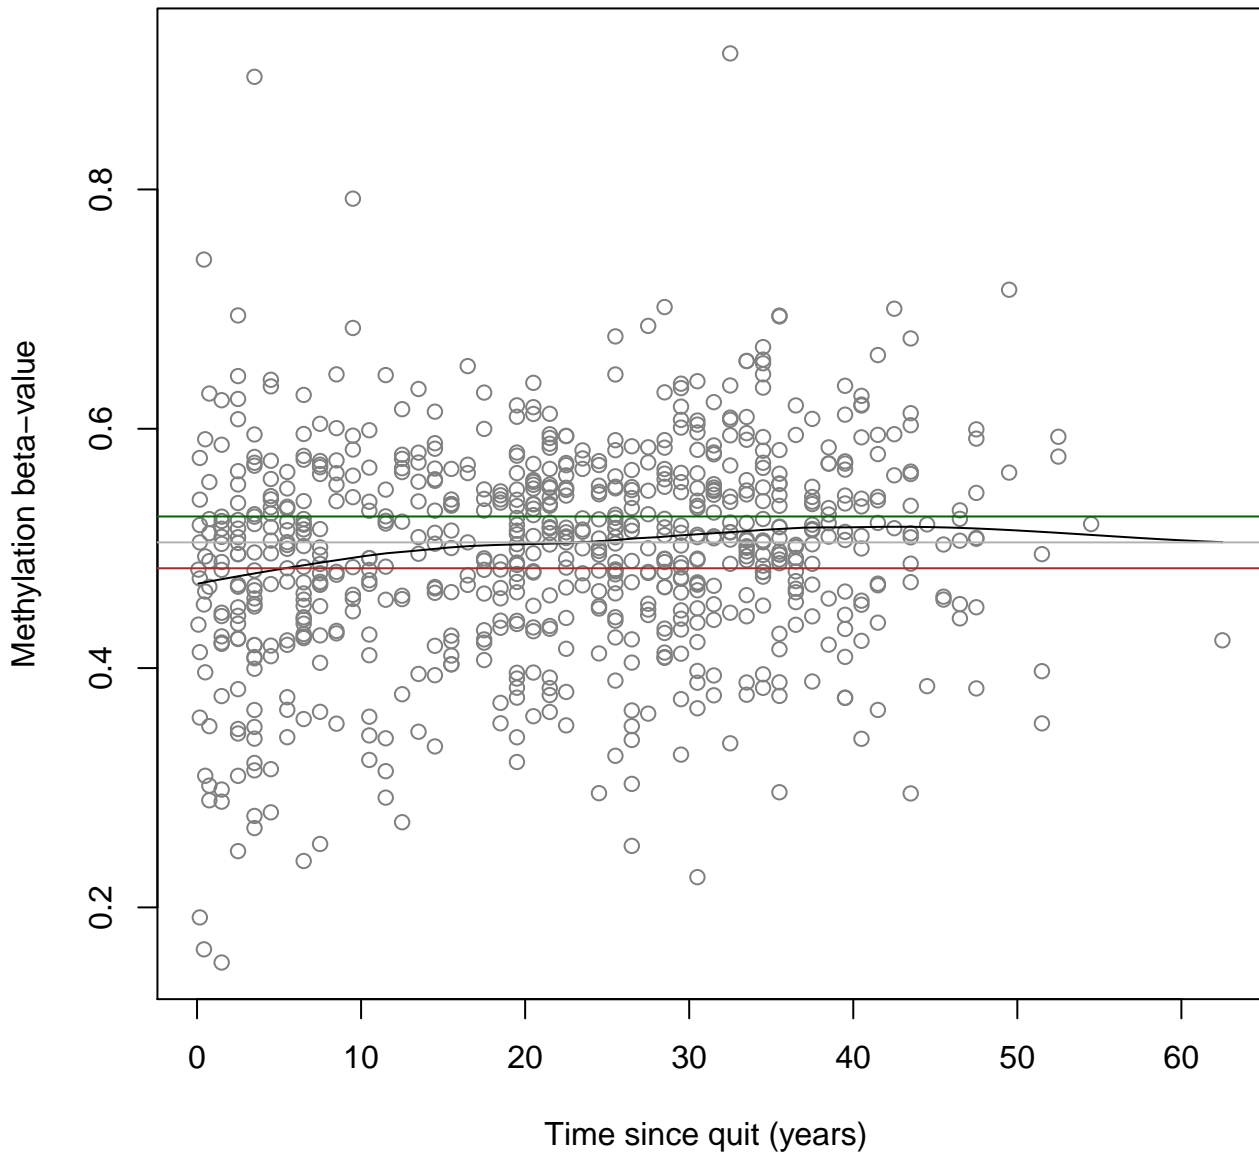

# cg01127300

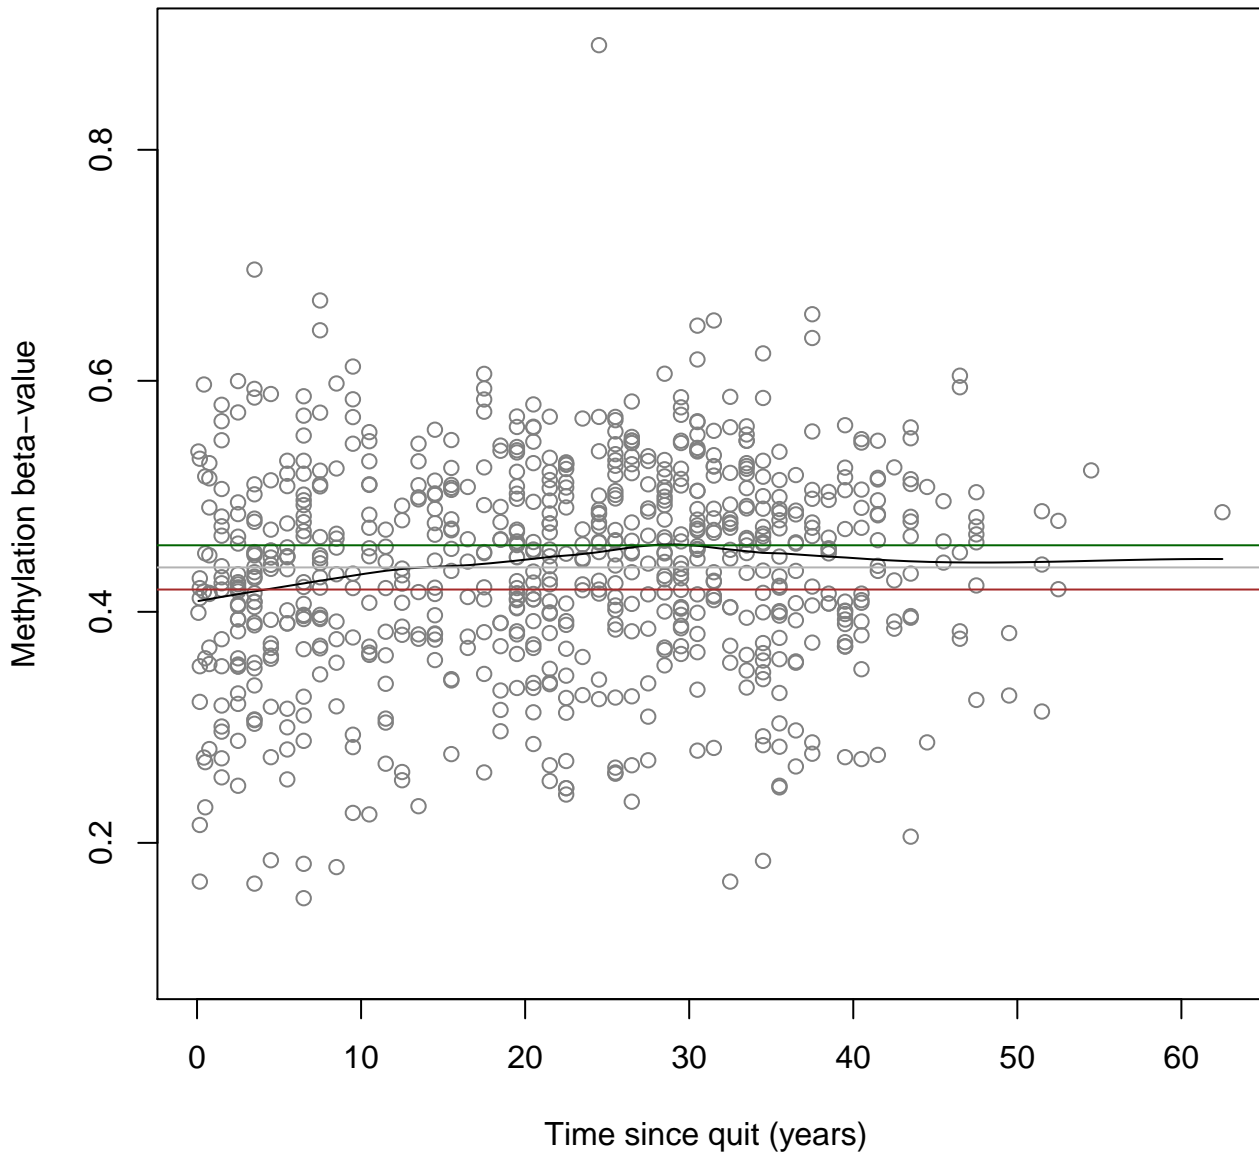

# cg01940273

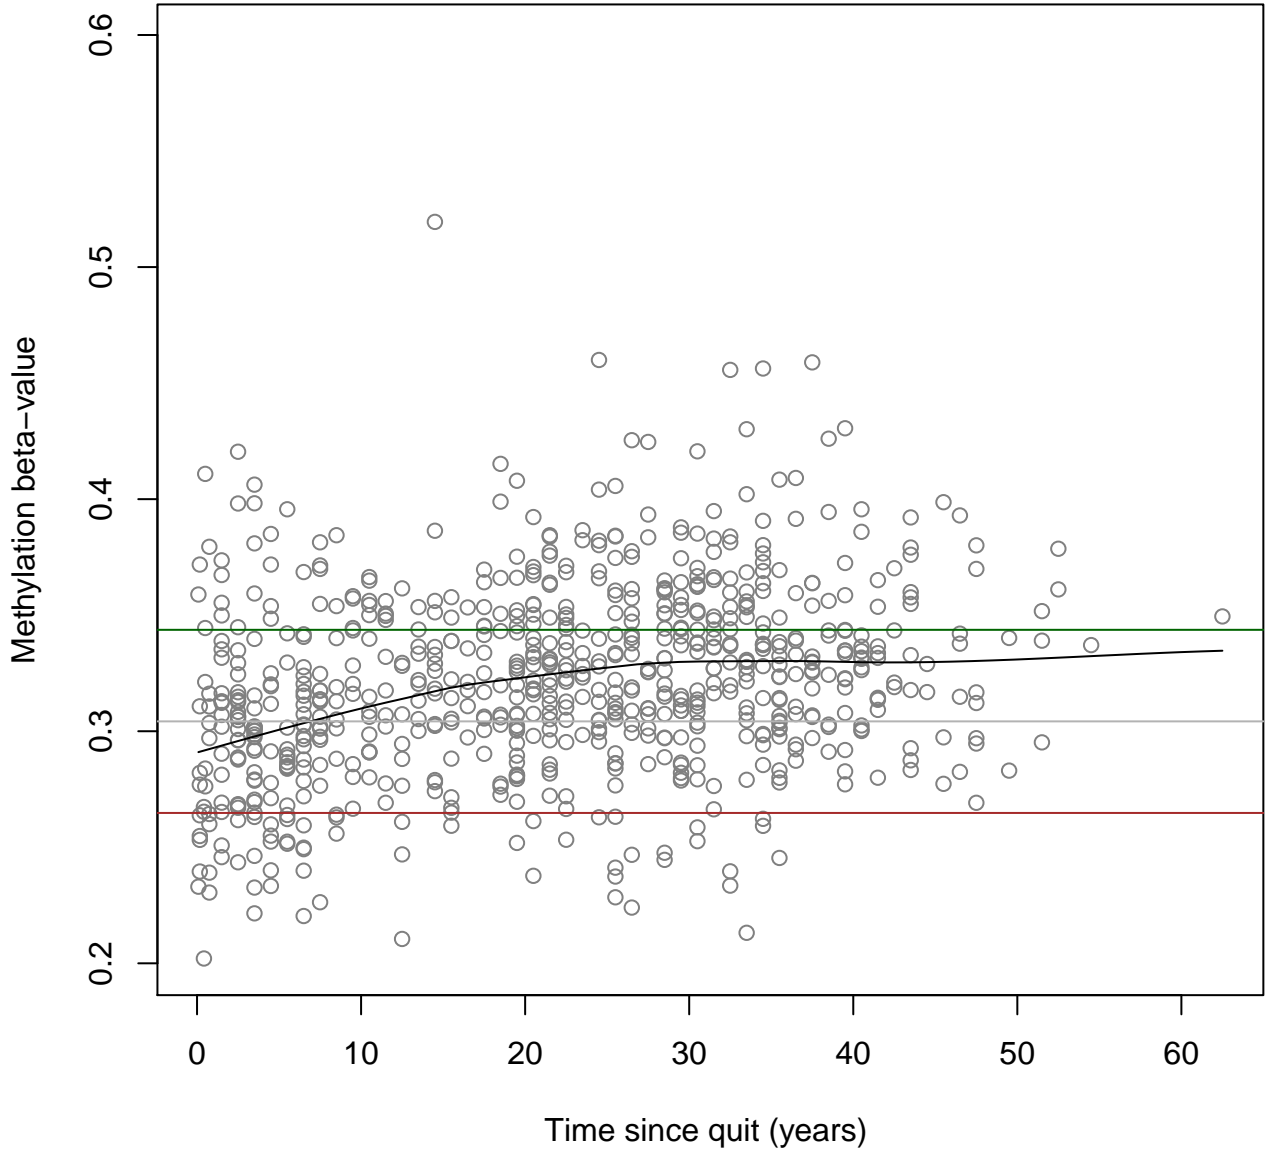

# cg02583484

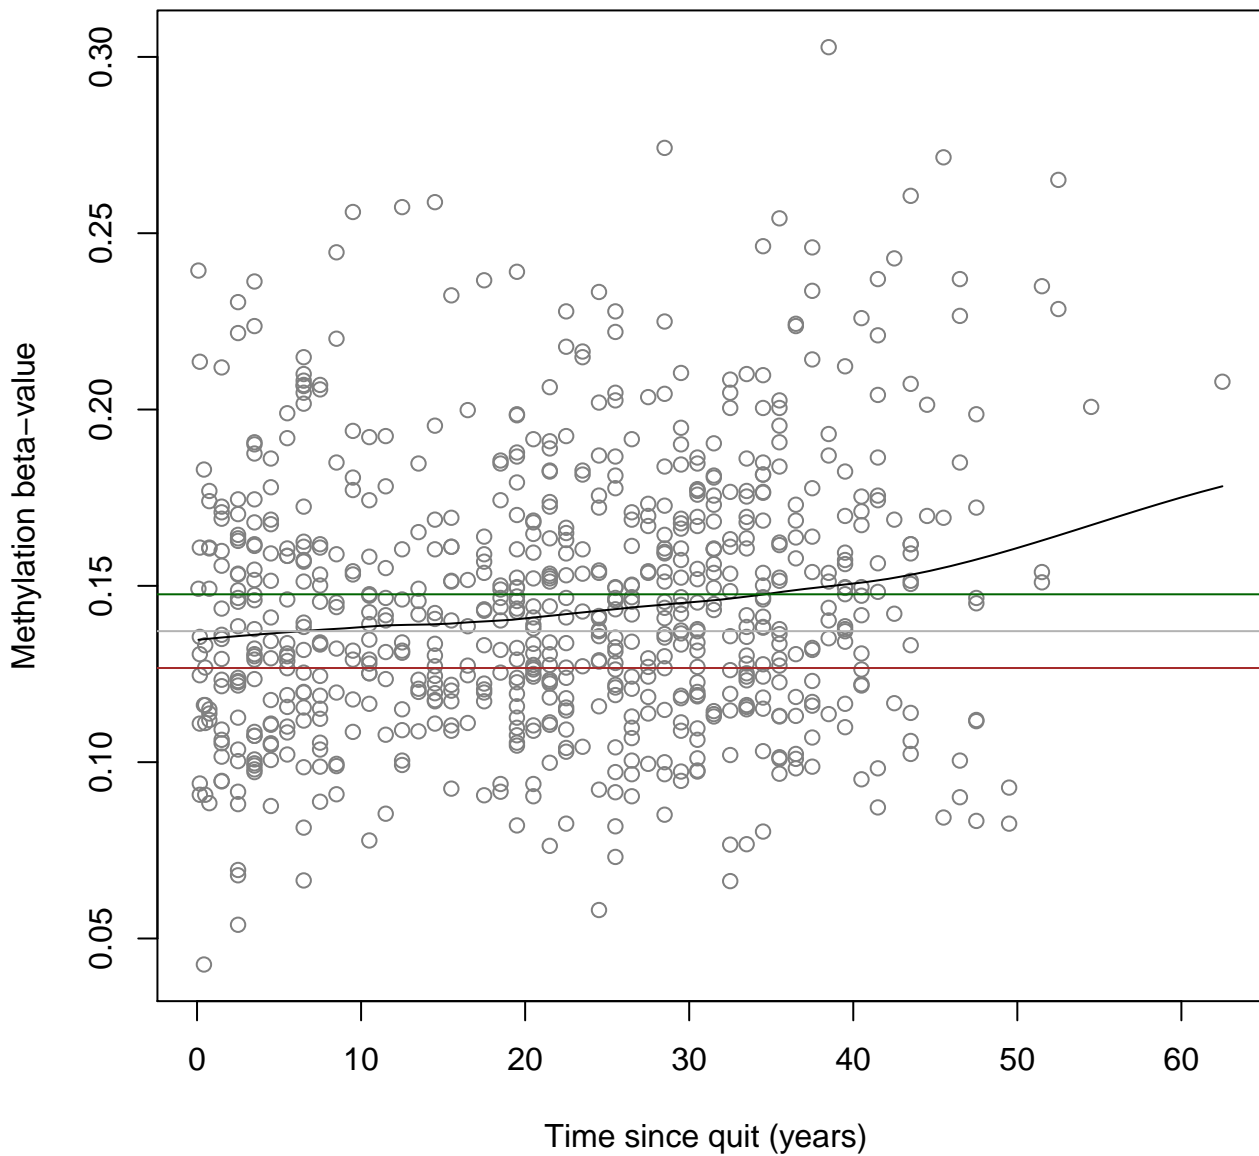

# cg03274391

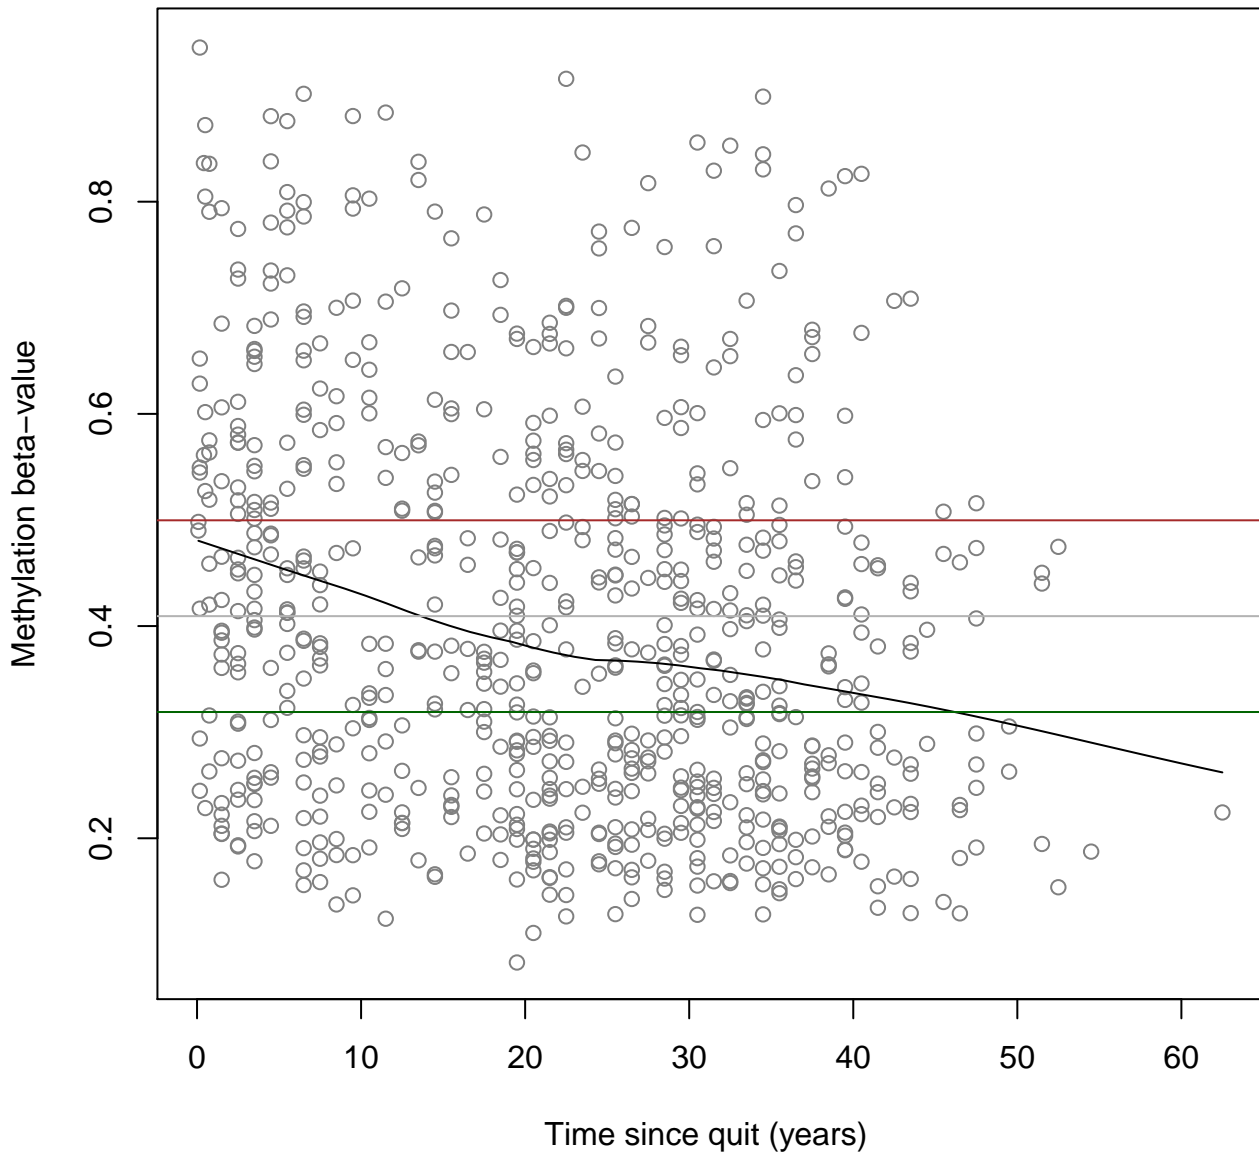

# cg03329539

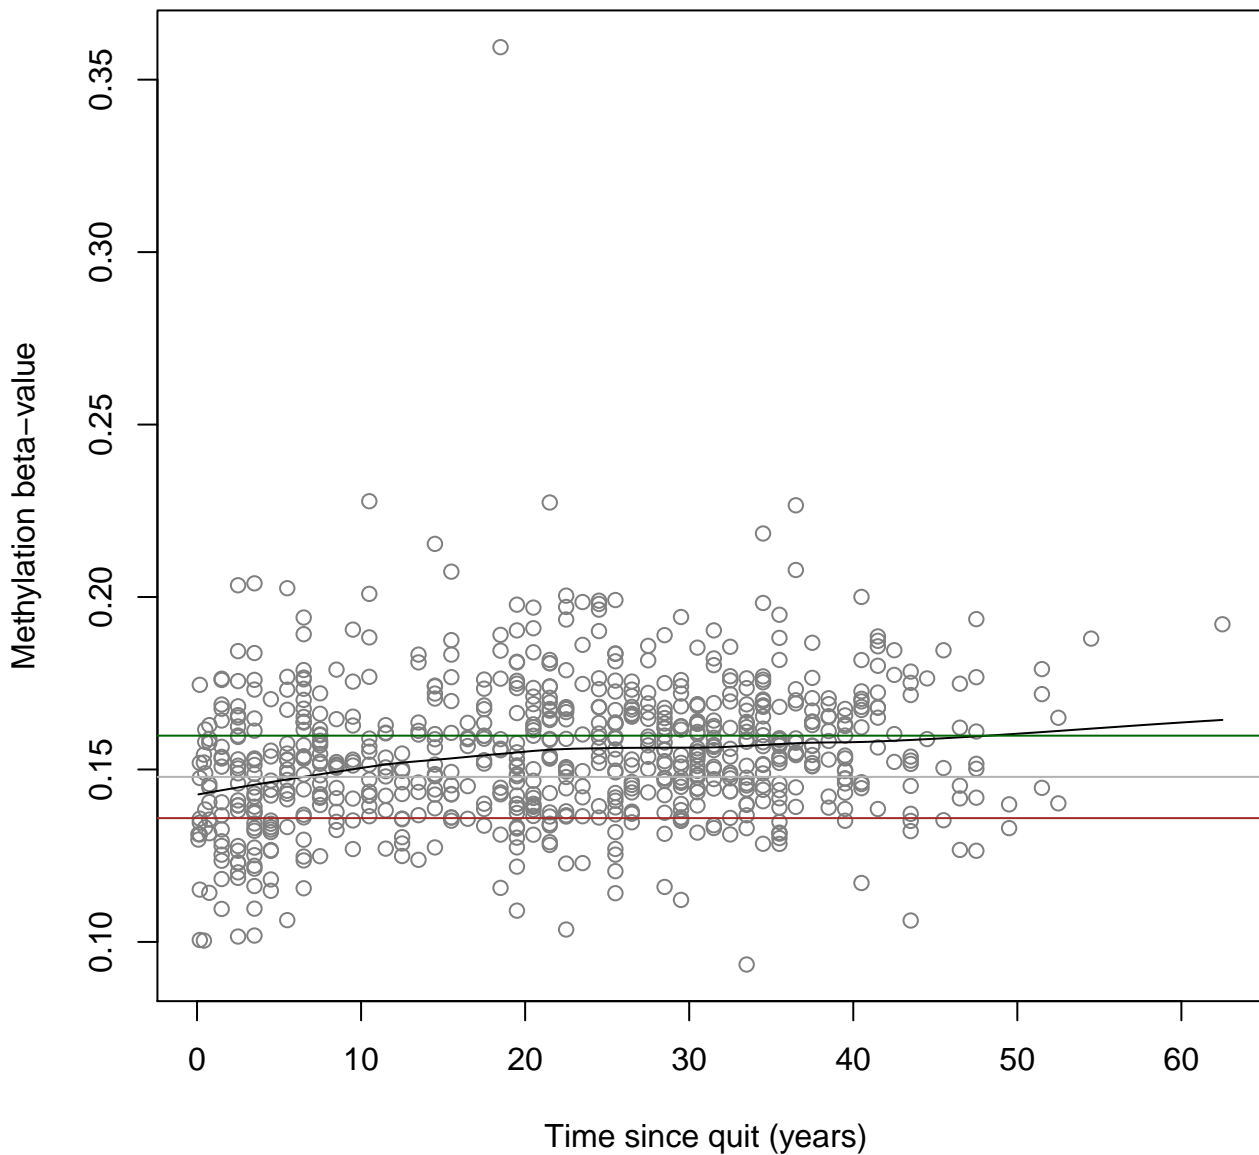

# cg03604011

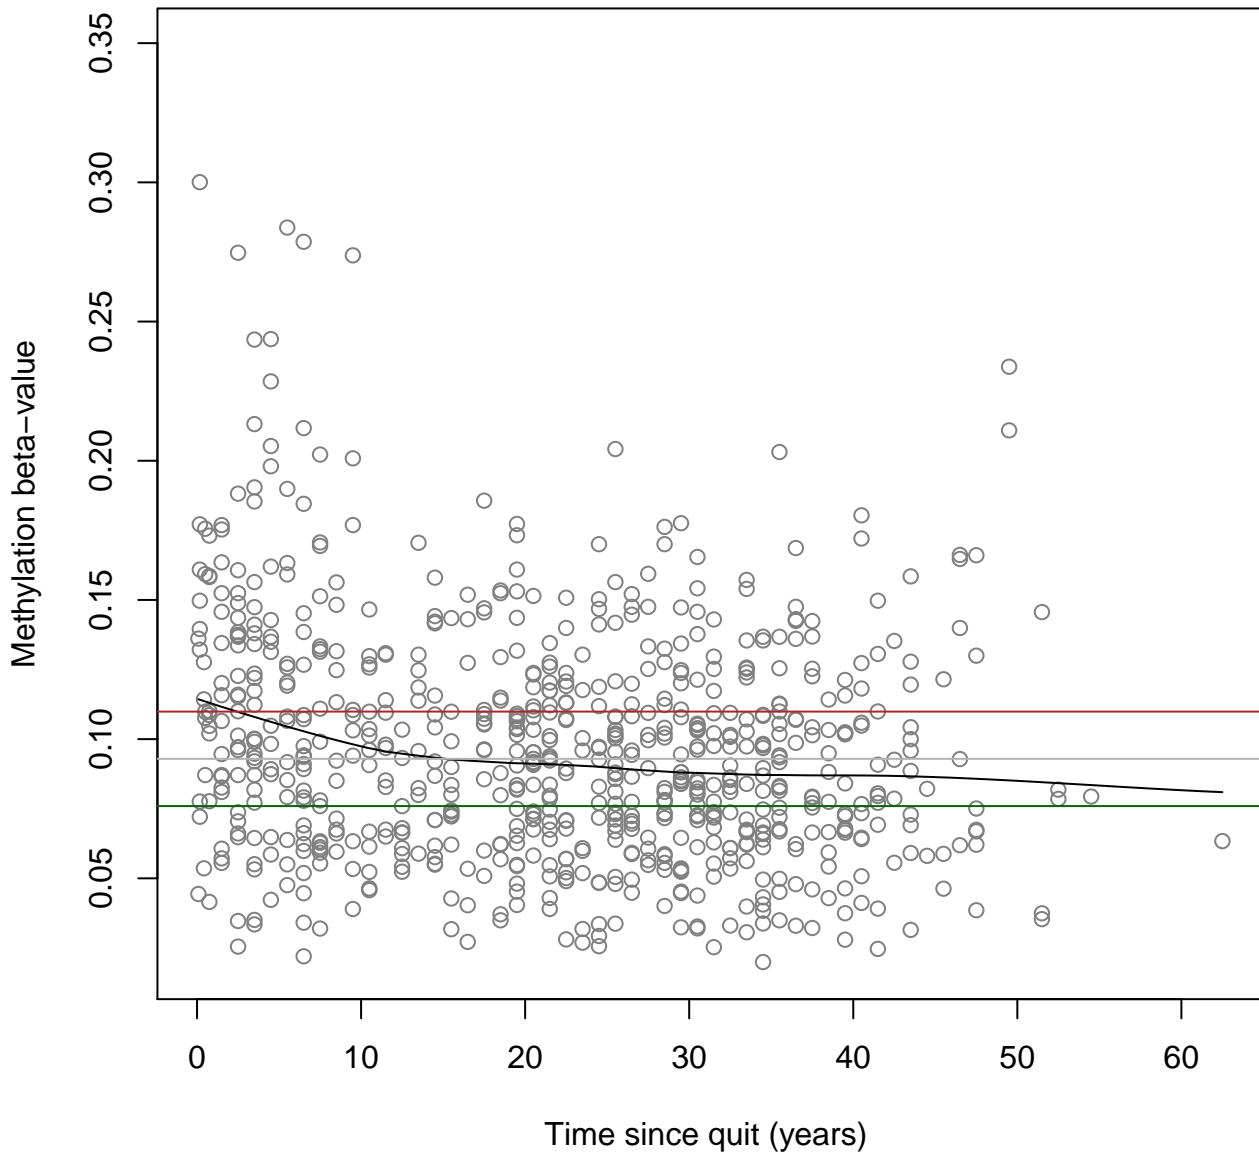

# cg03636183

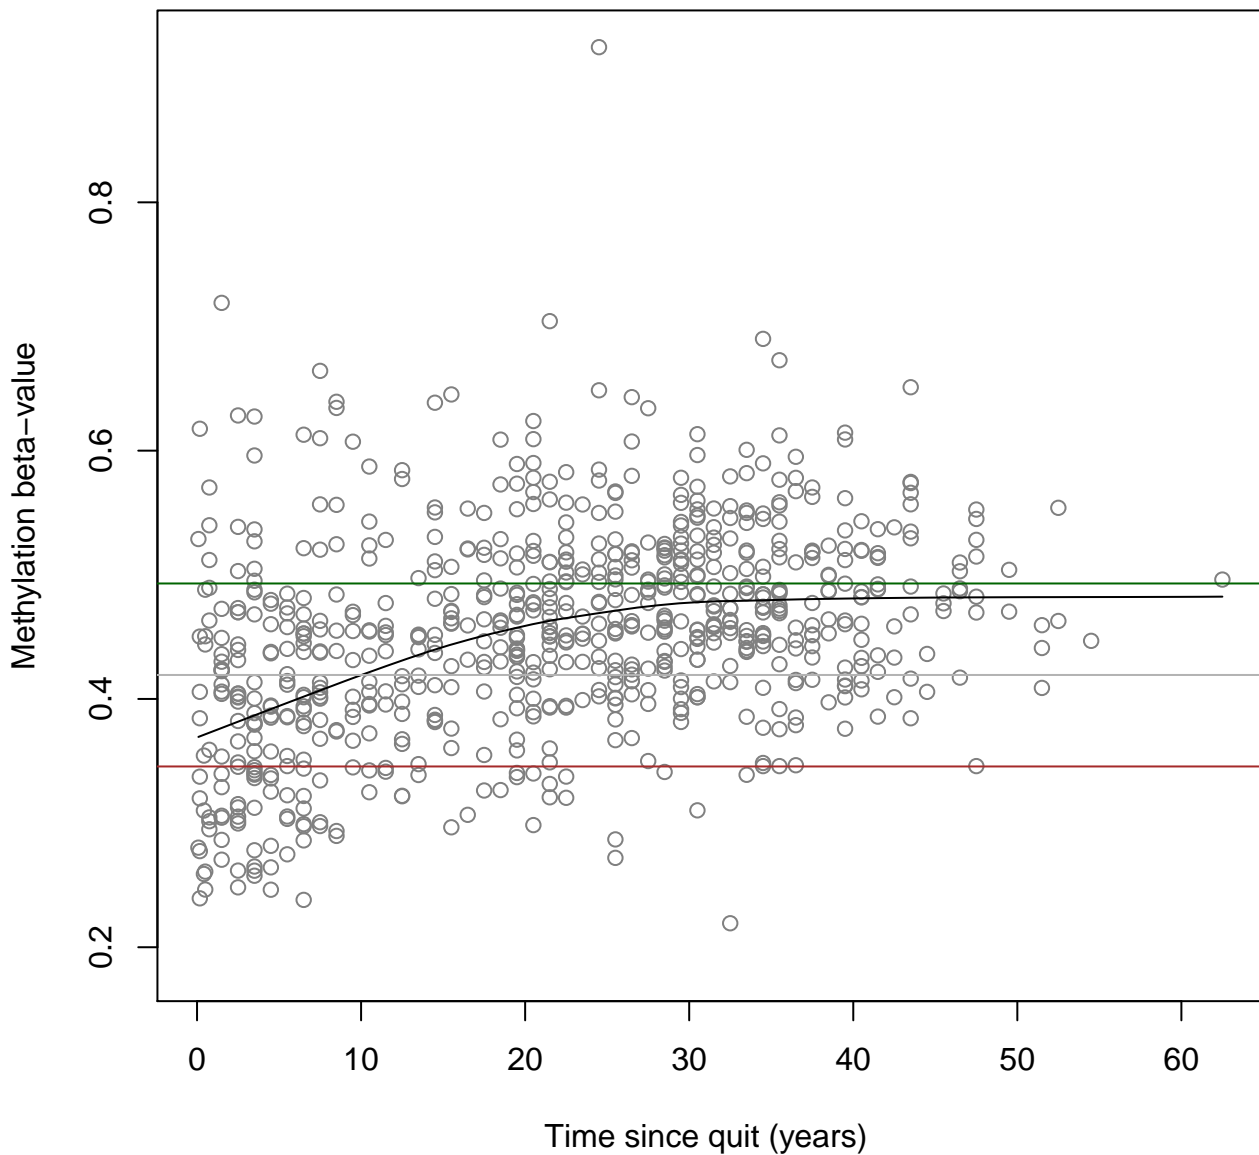



# cg03991871

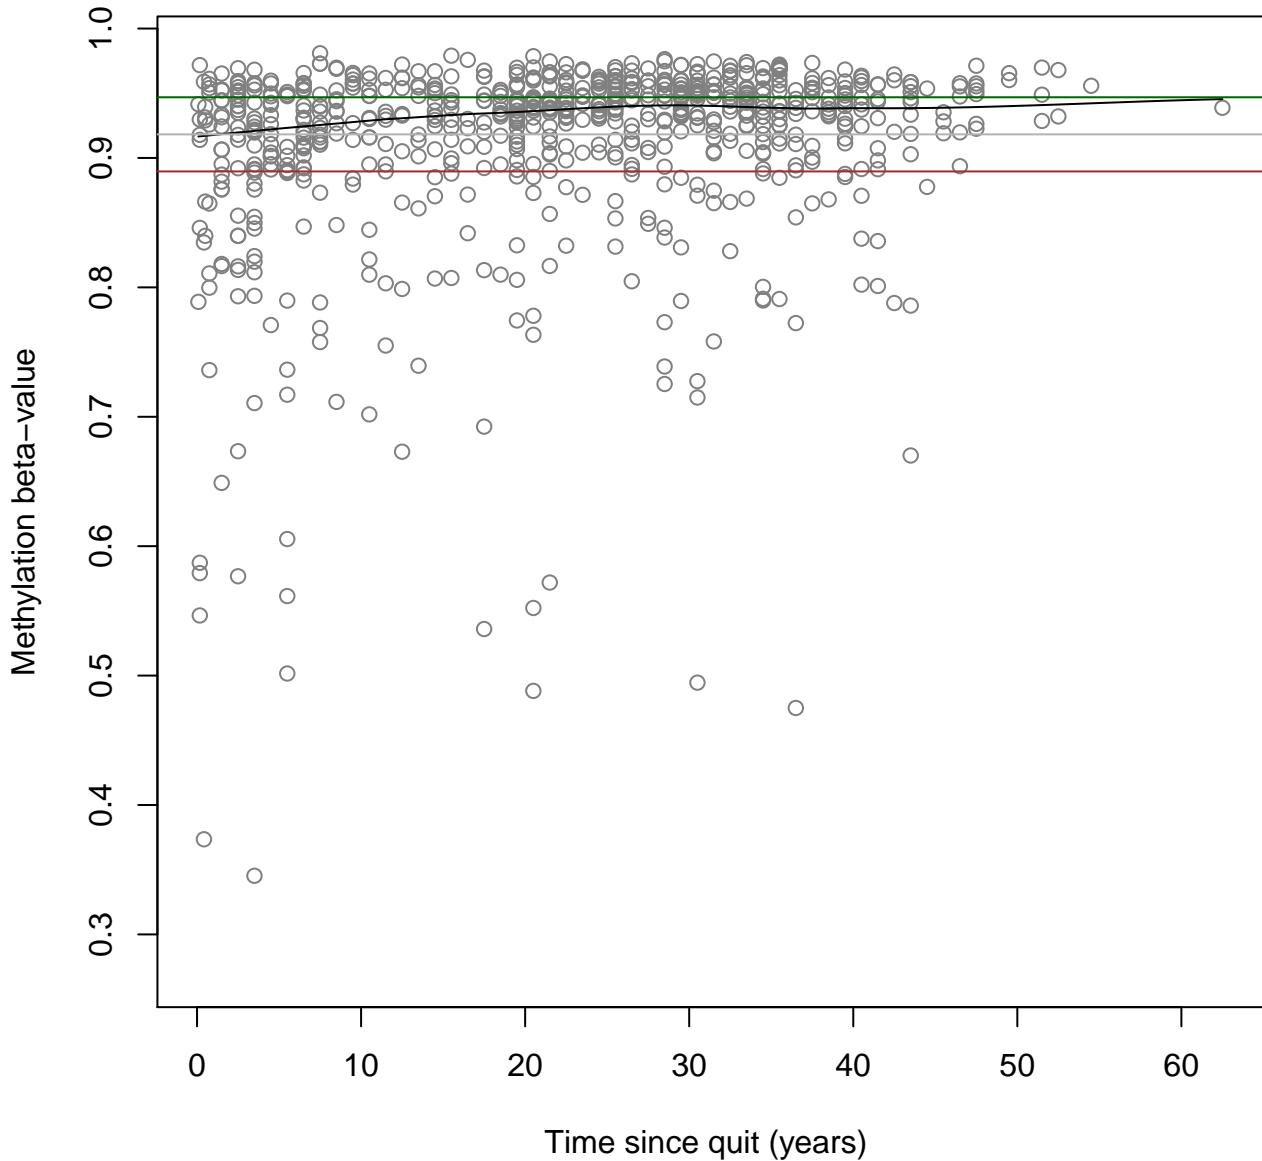

# cg05575921

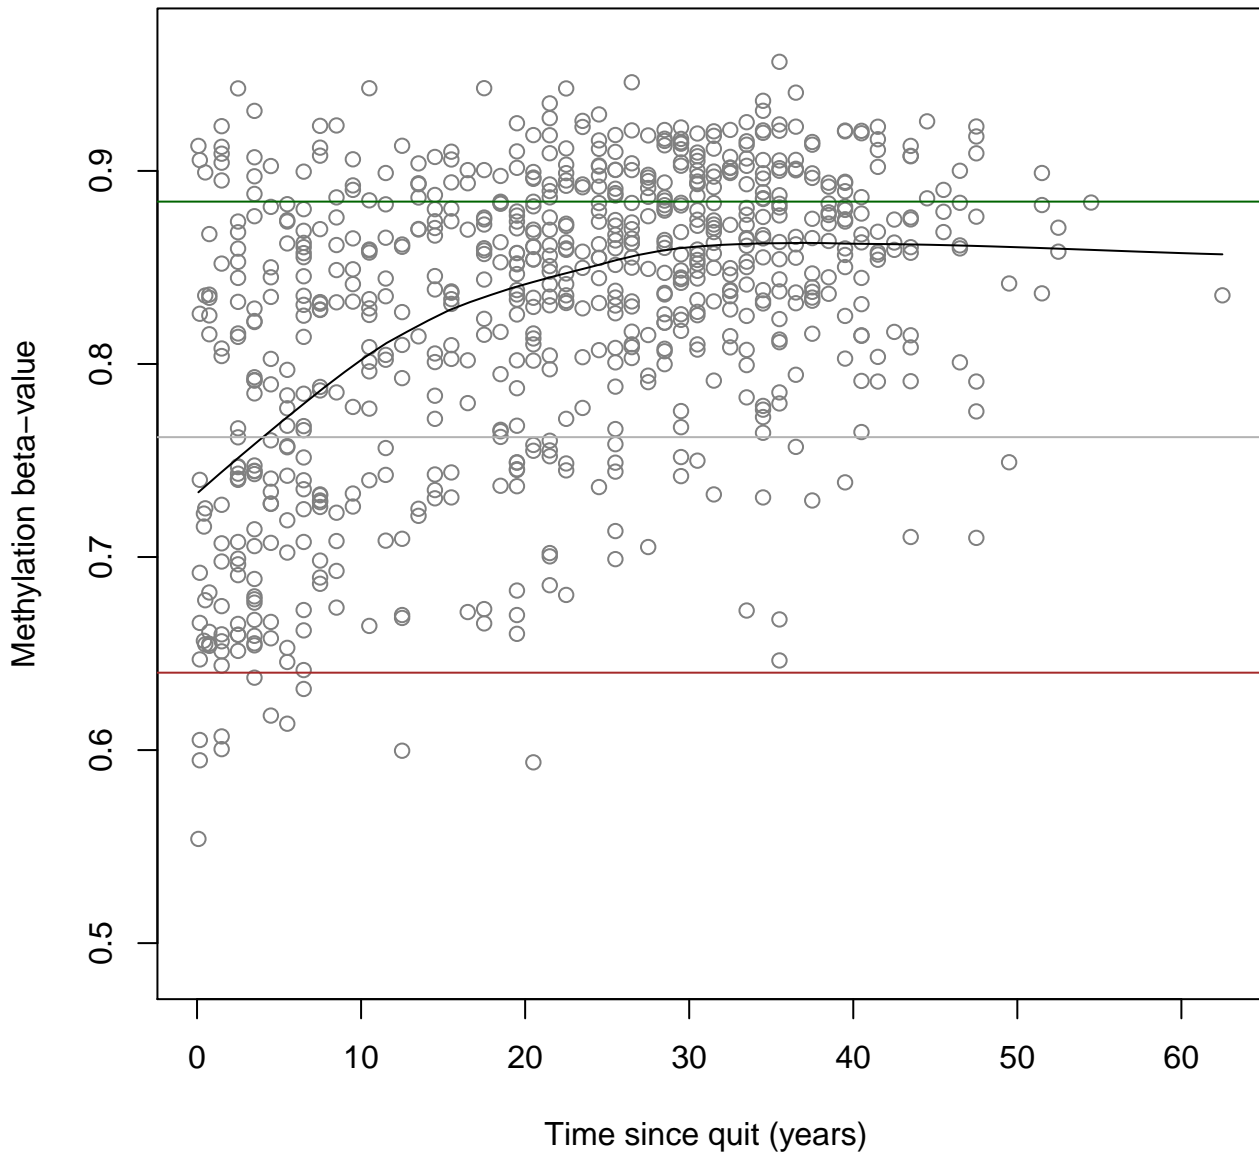

# cg05951221

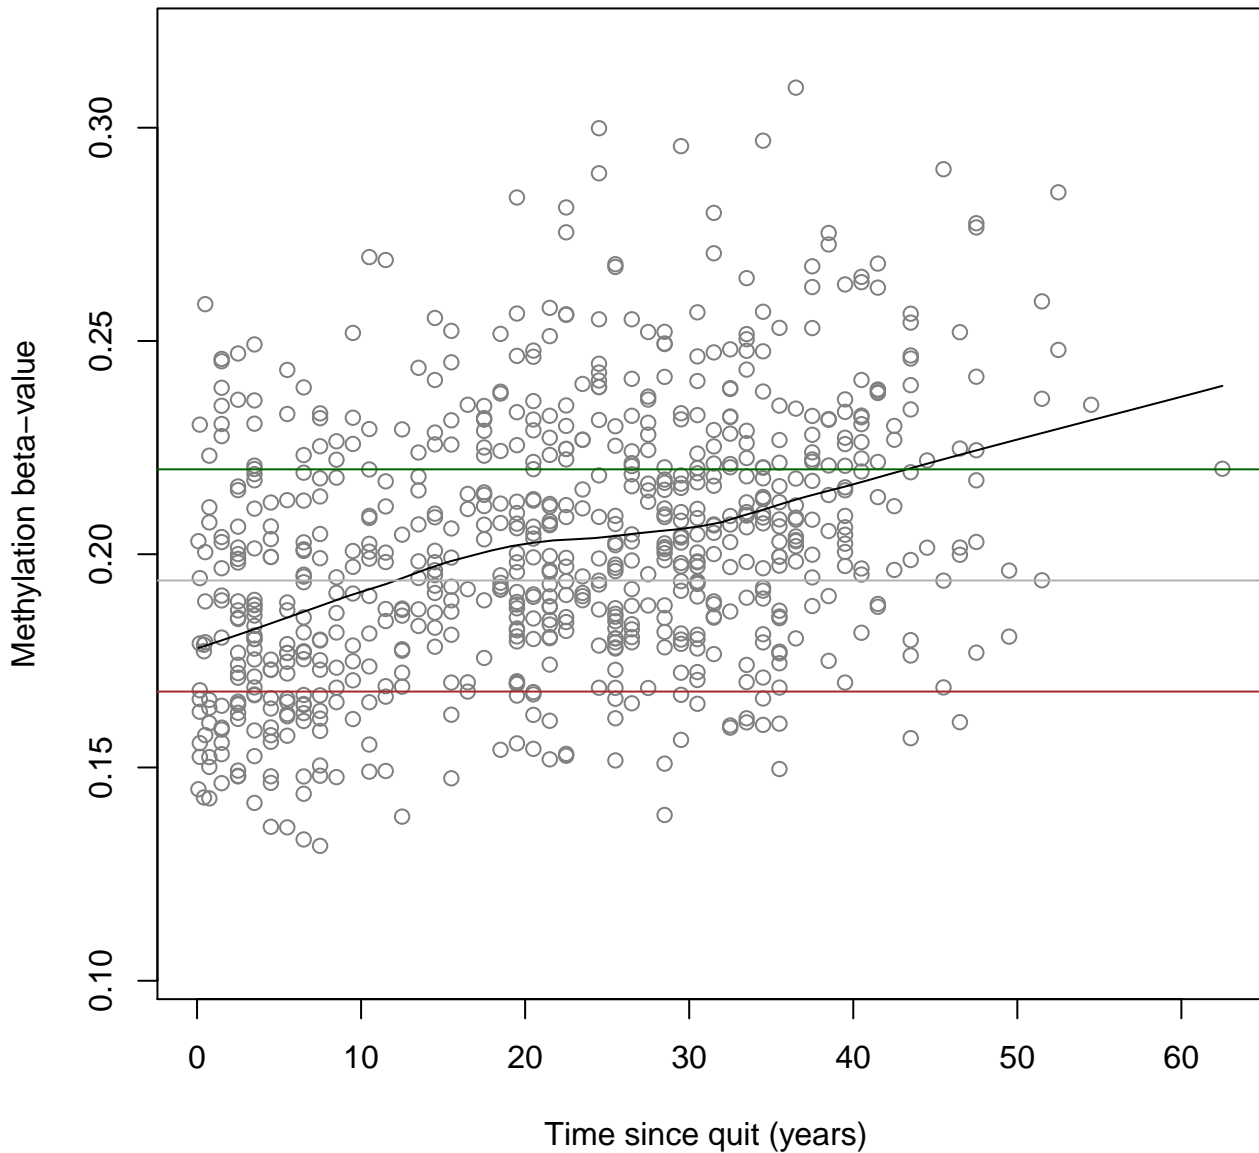

# cg06126421

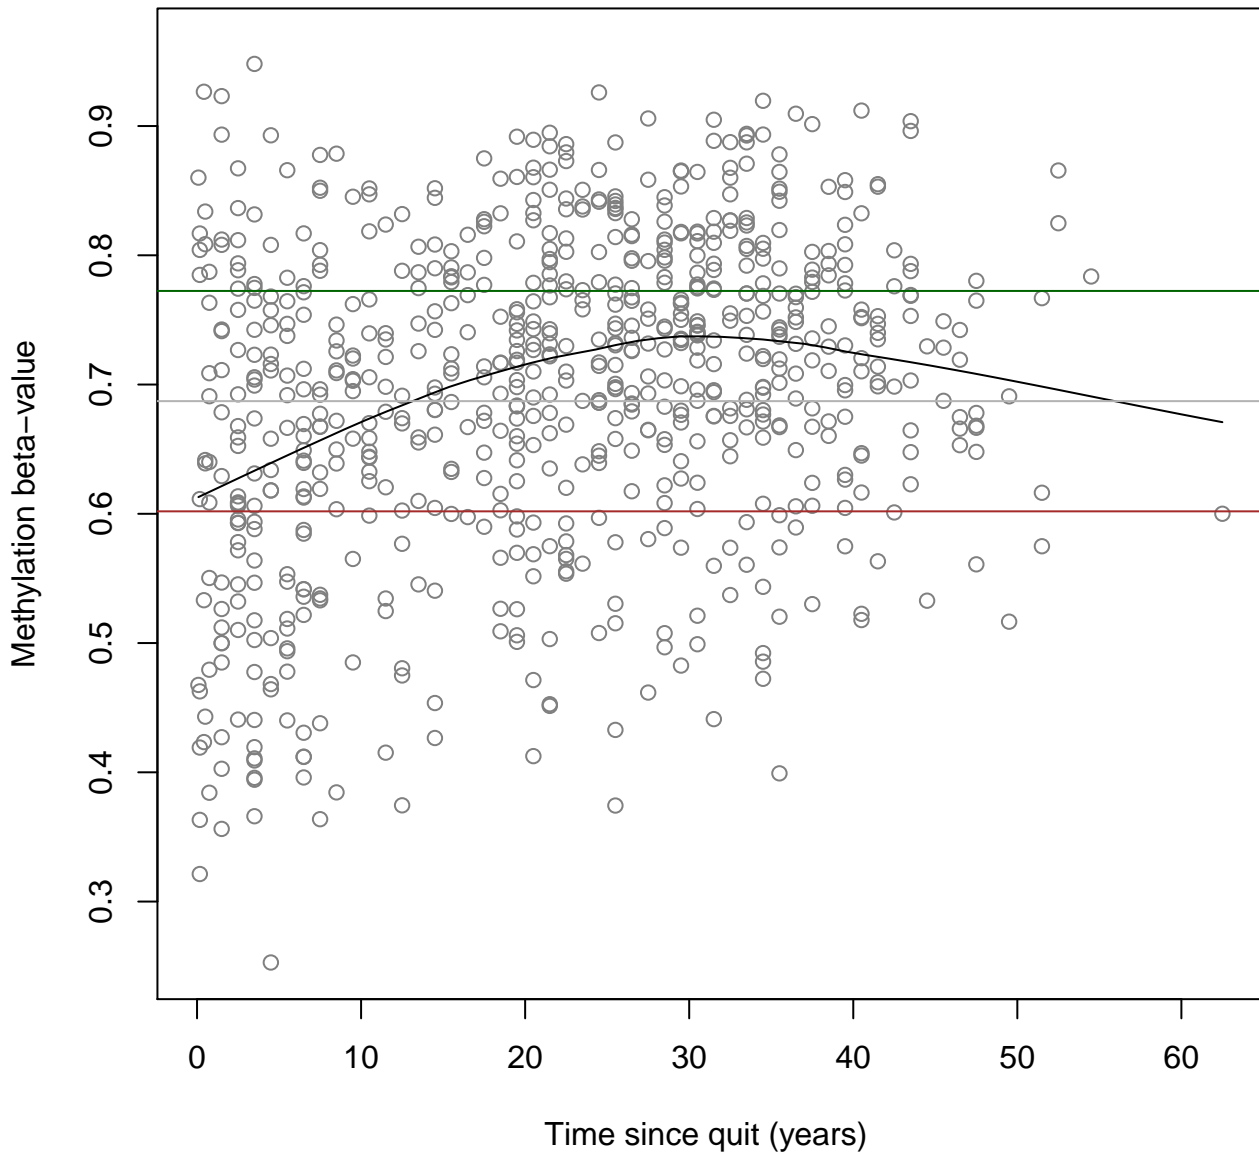

# cg06644428

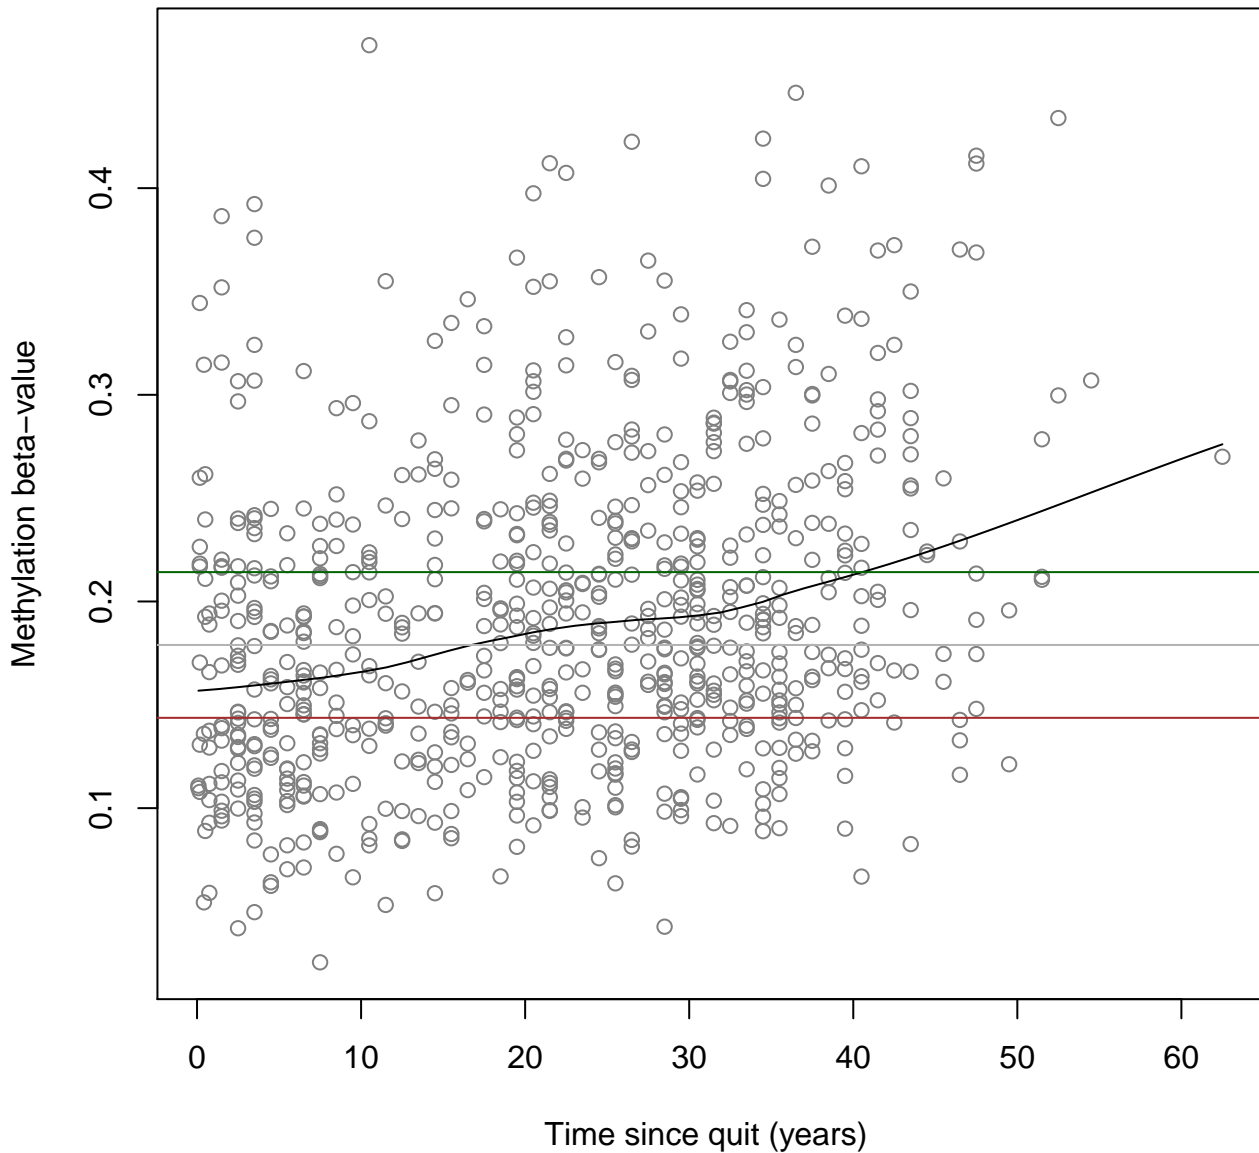

# cg09084200

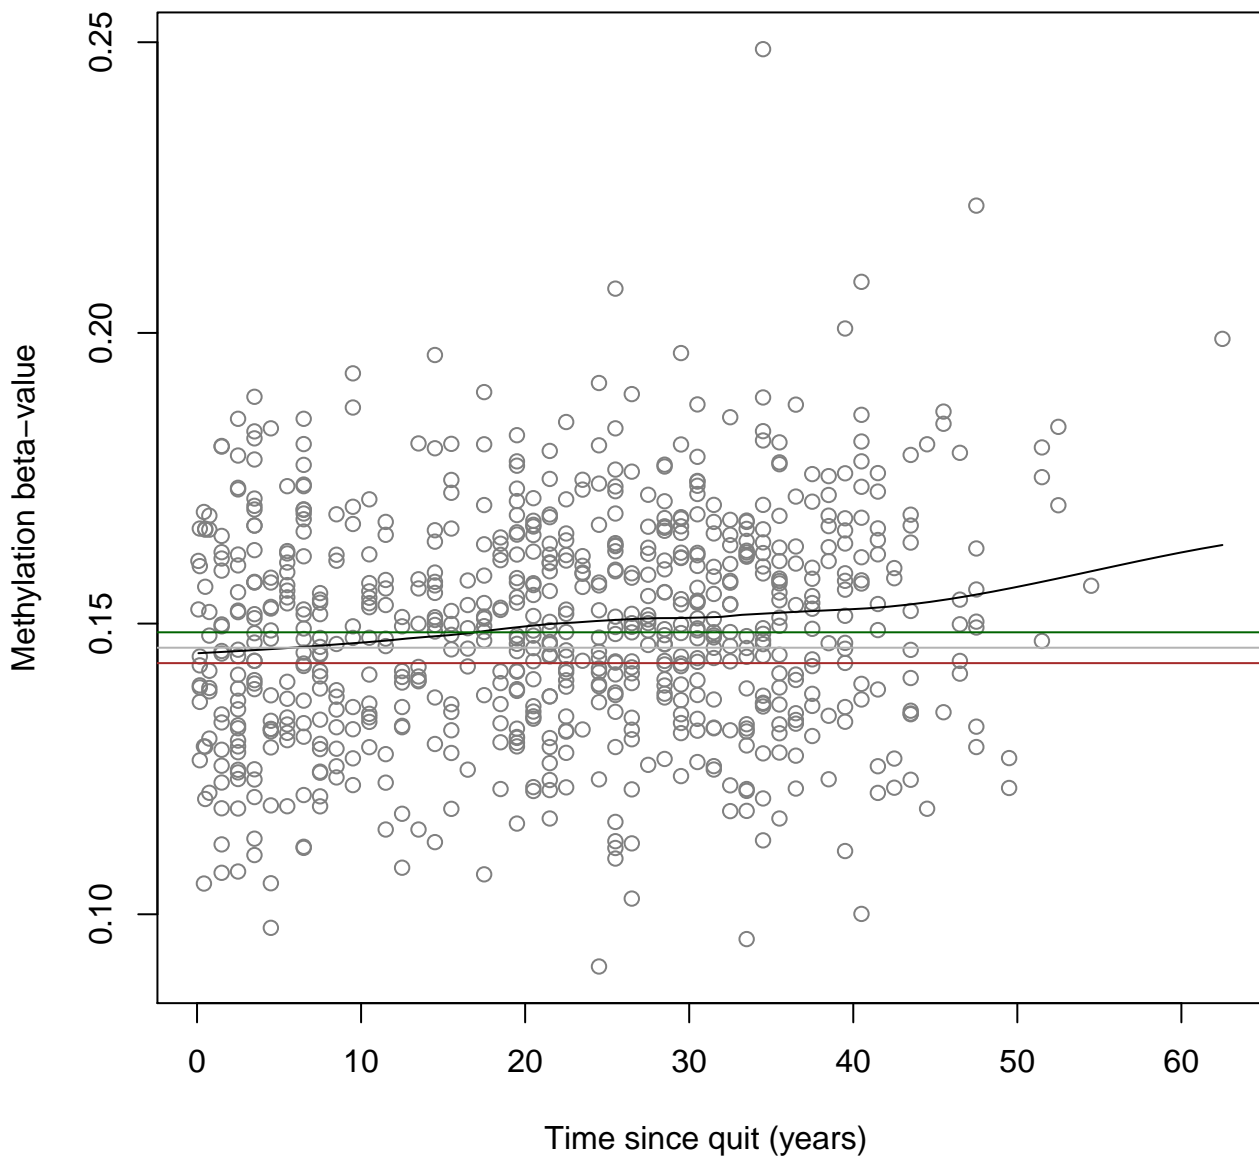

# cg11554391

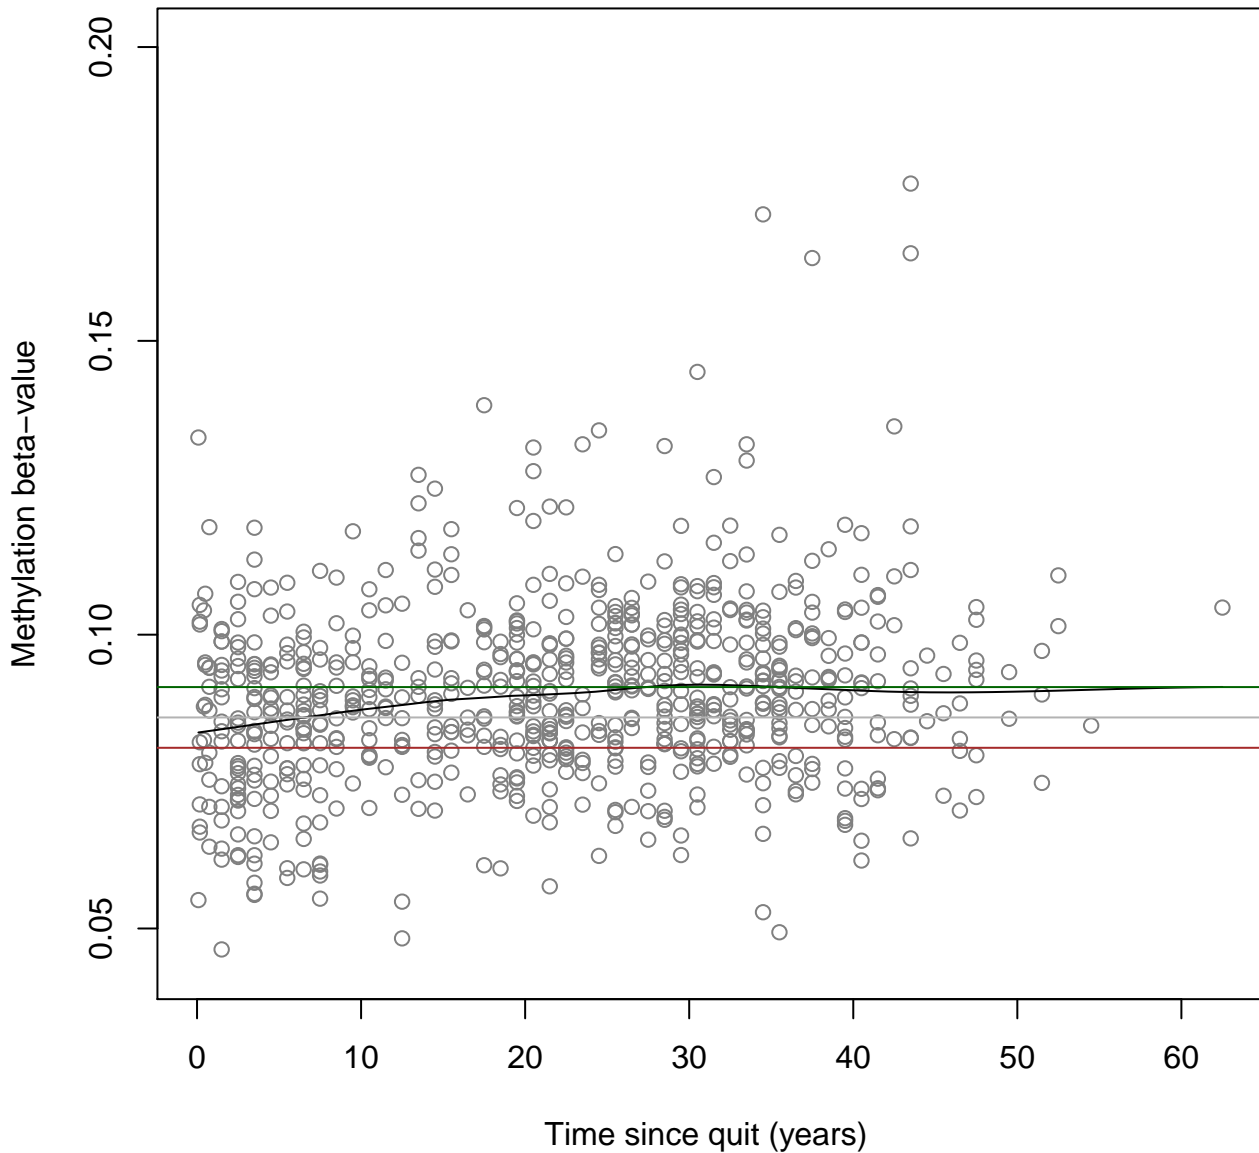

# cg11660018

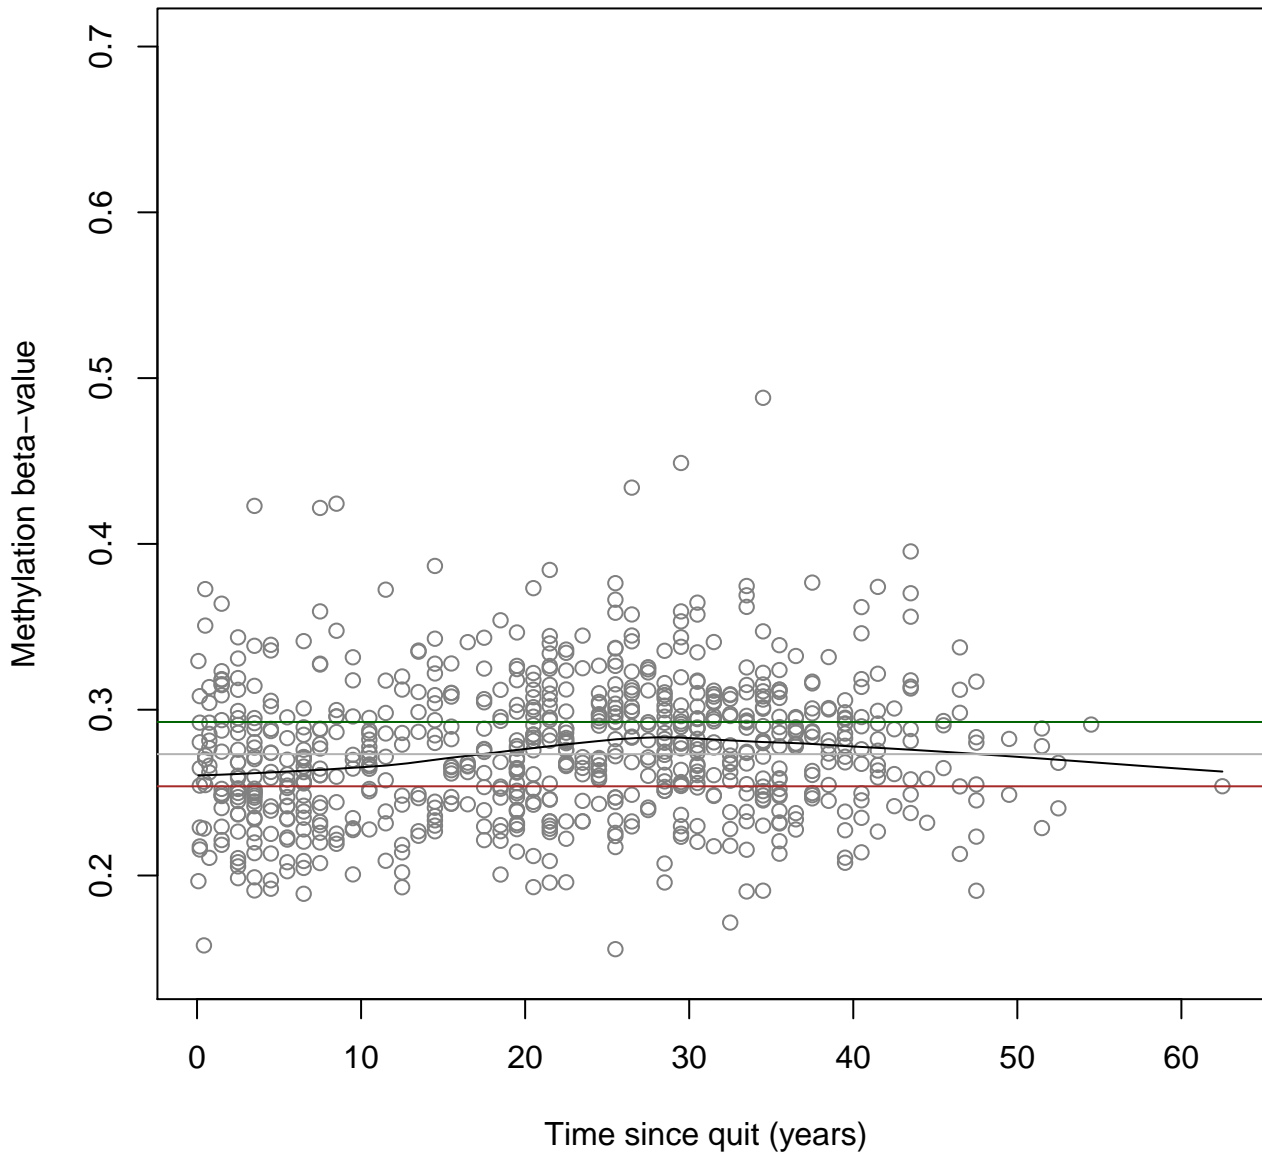



# cg11902777

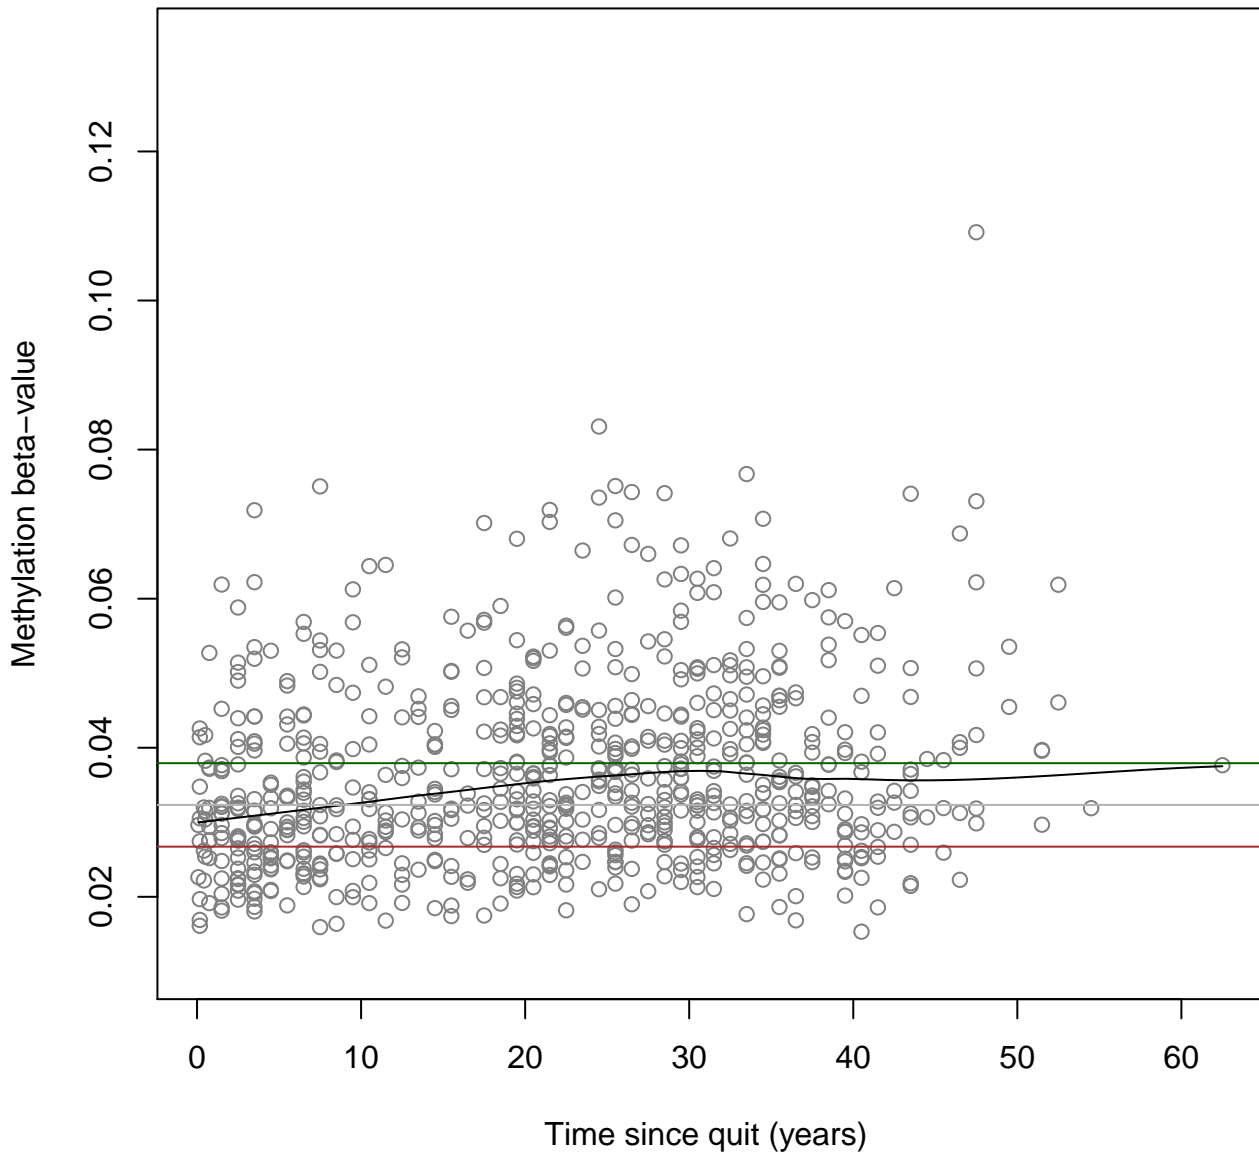

# cg12303084

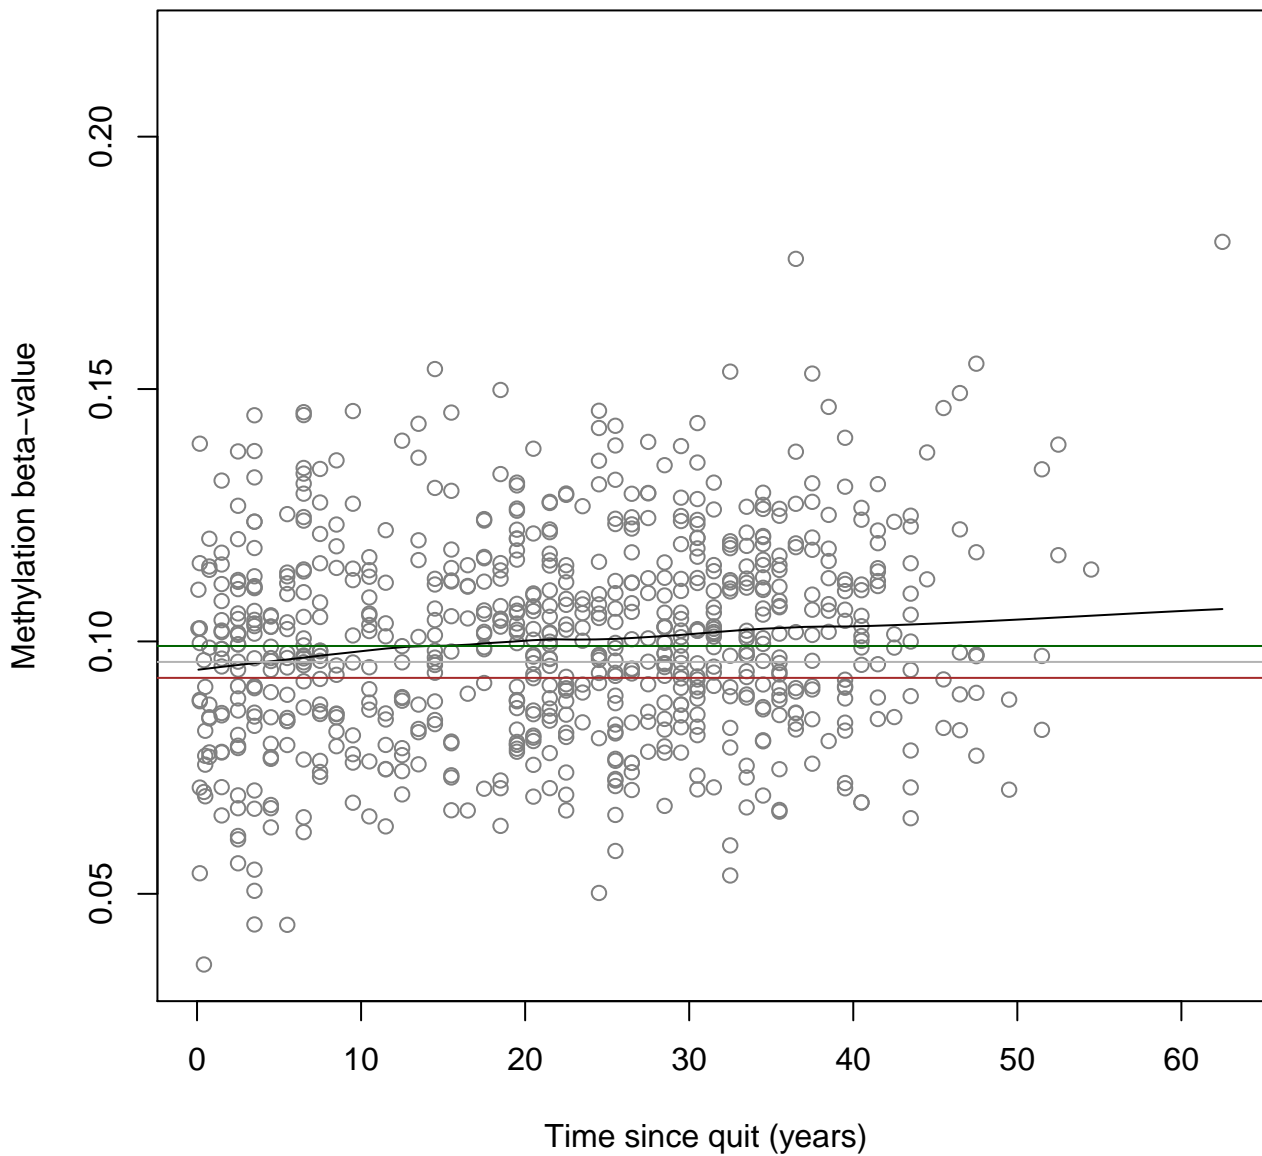

# cg12803068

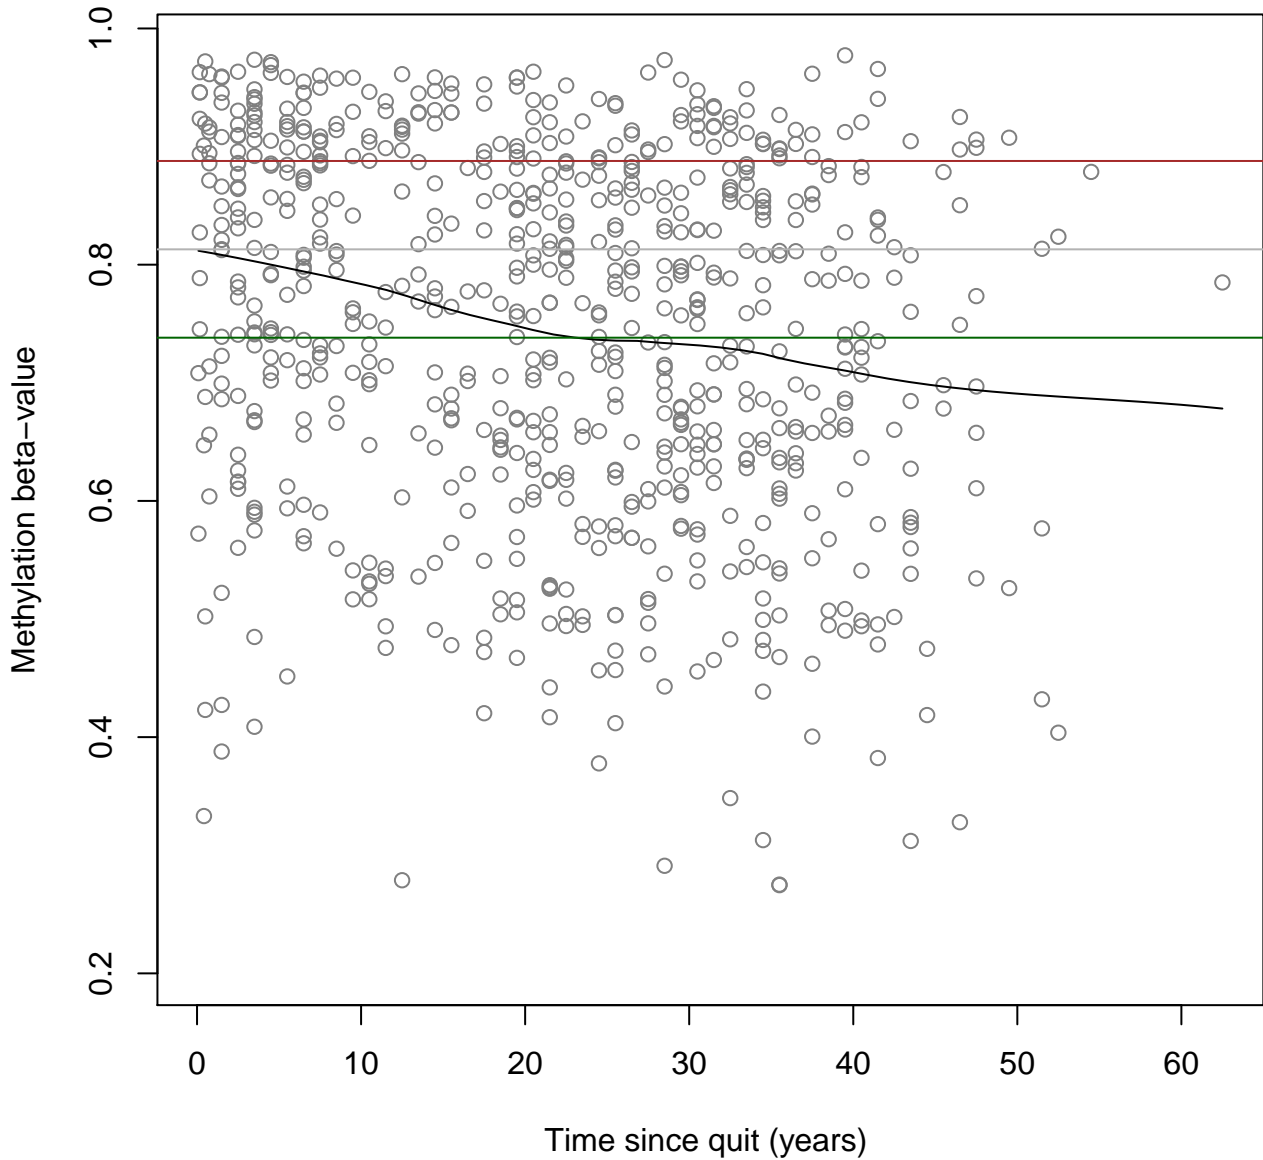

# cg14753356

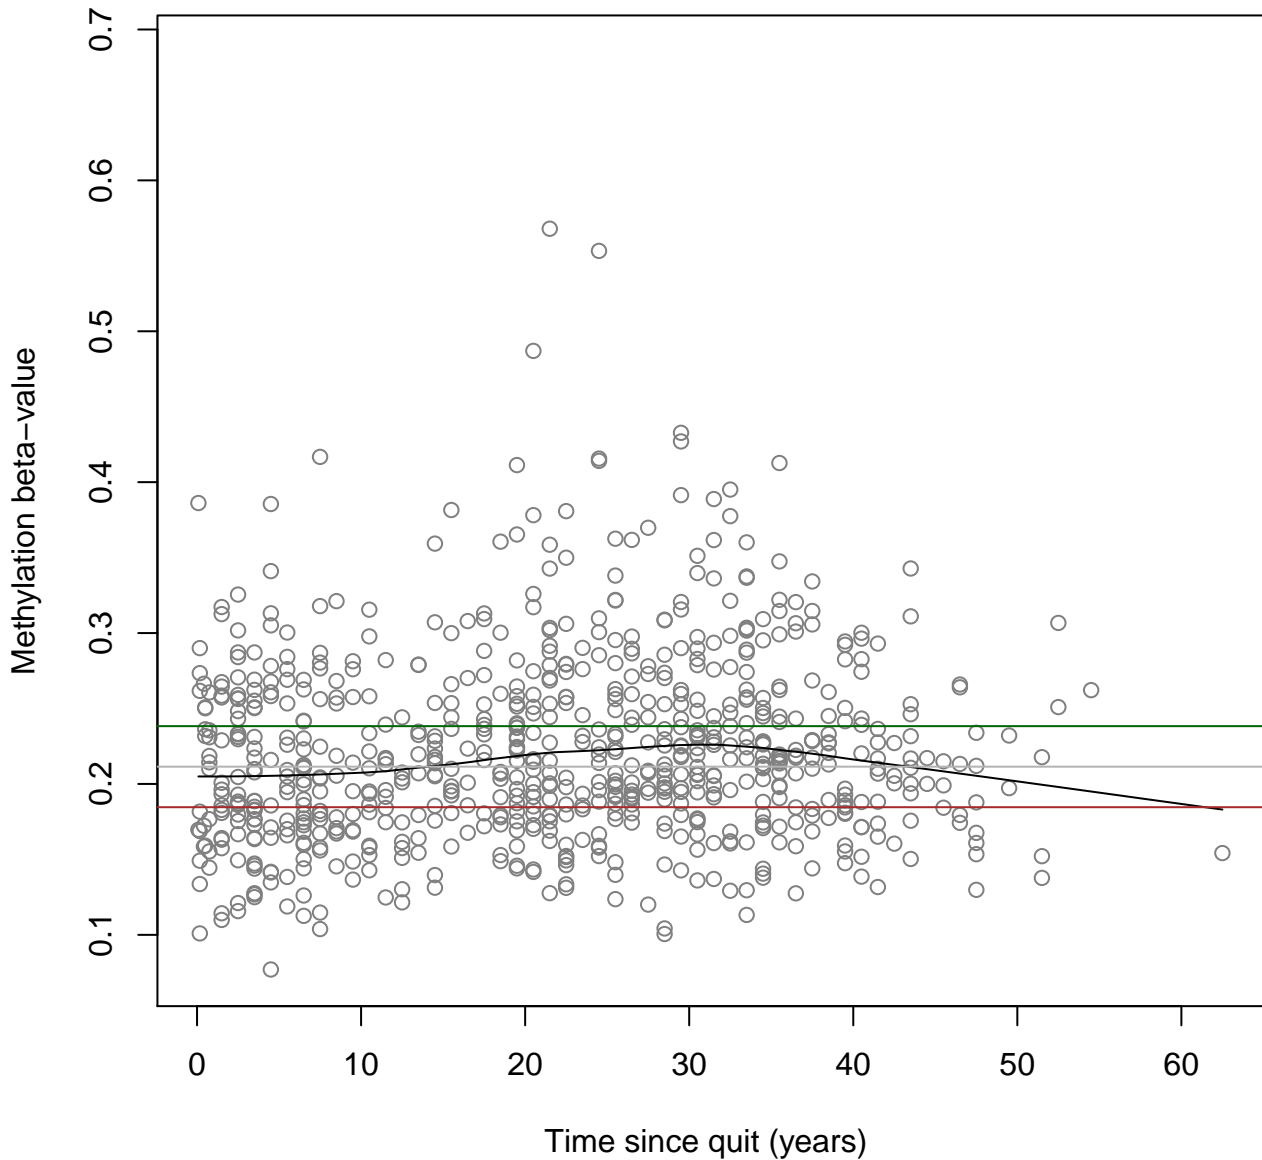

# cg14817490

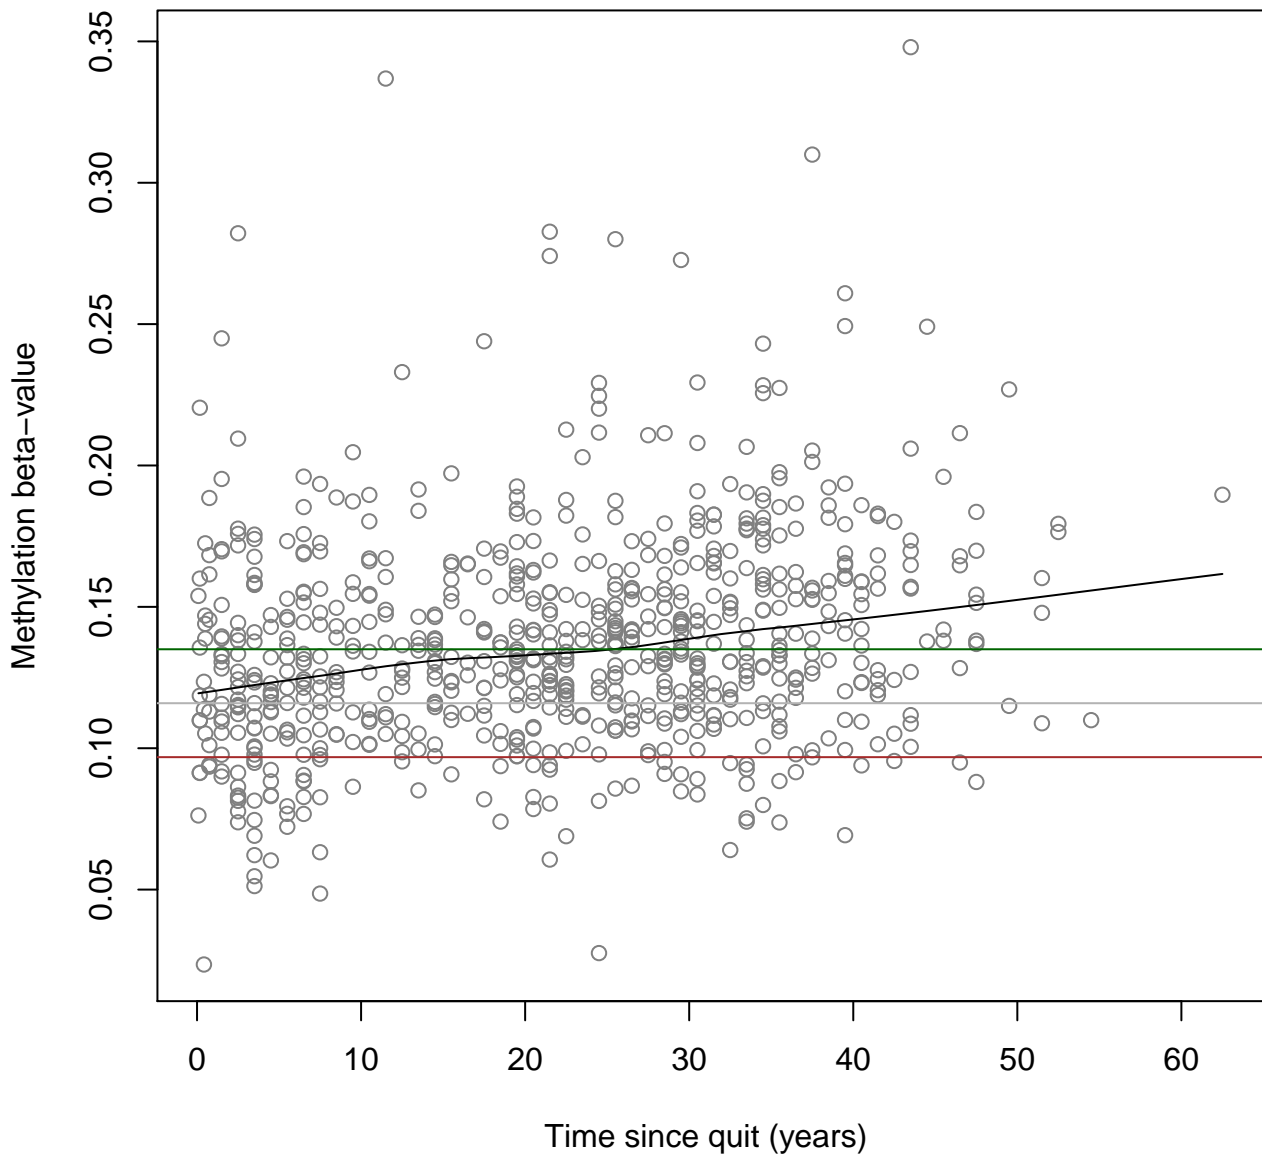

# cg15342087

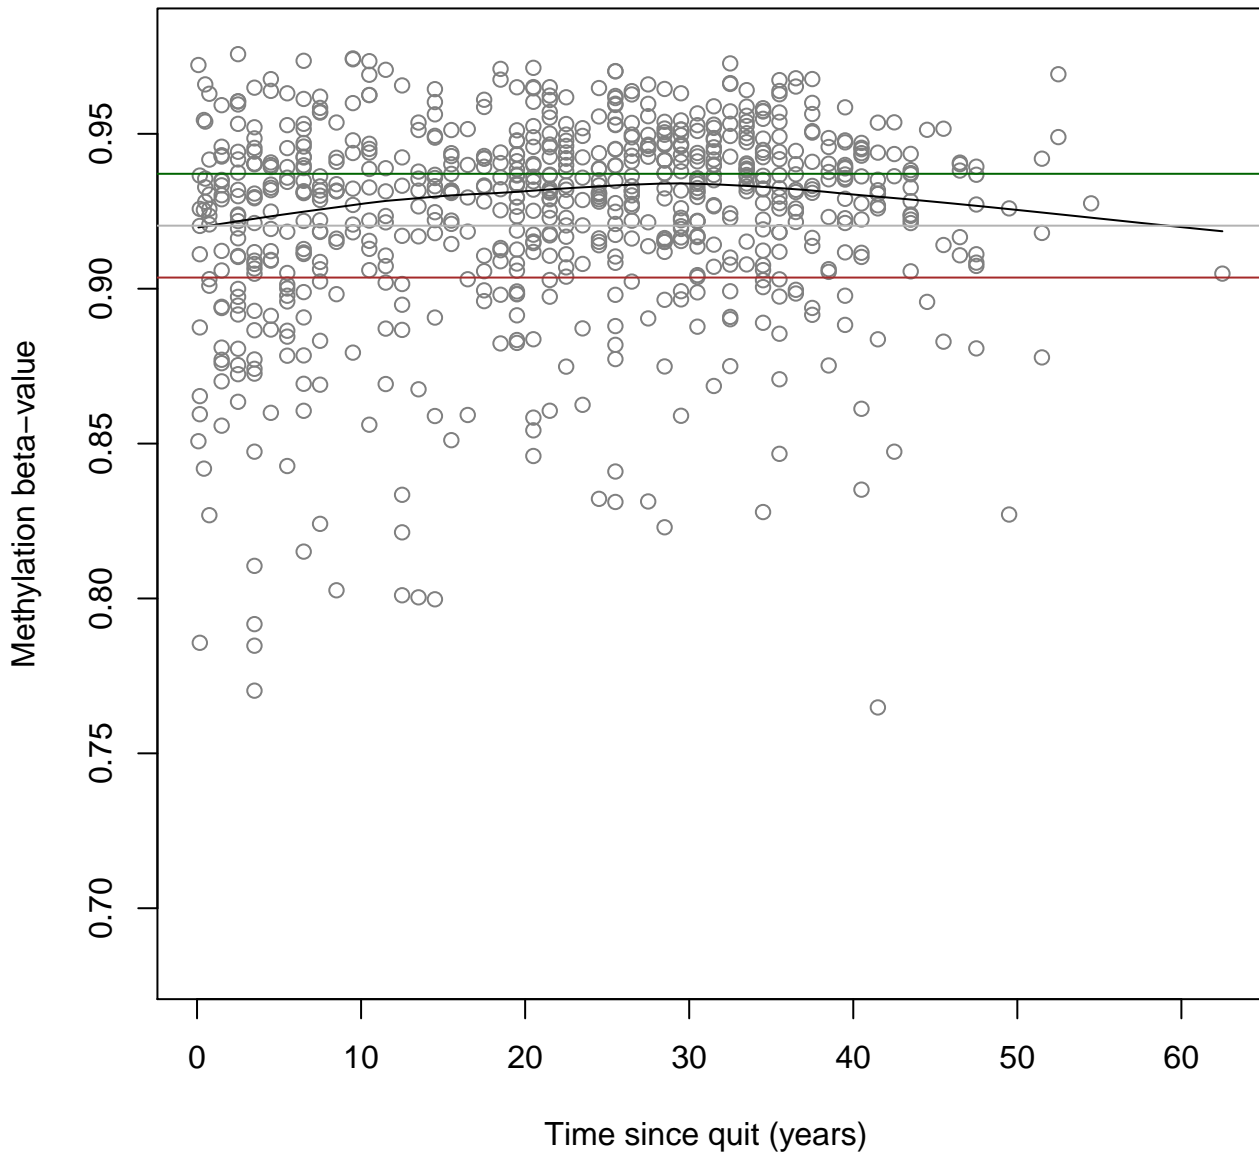

# cg15693572

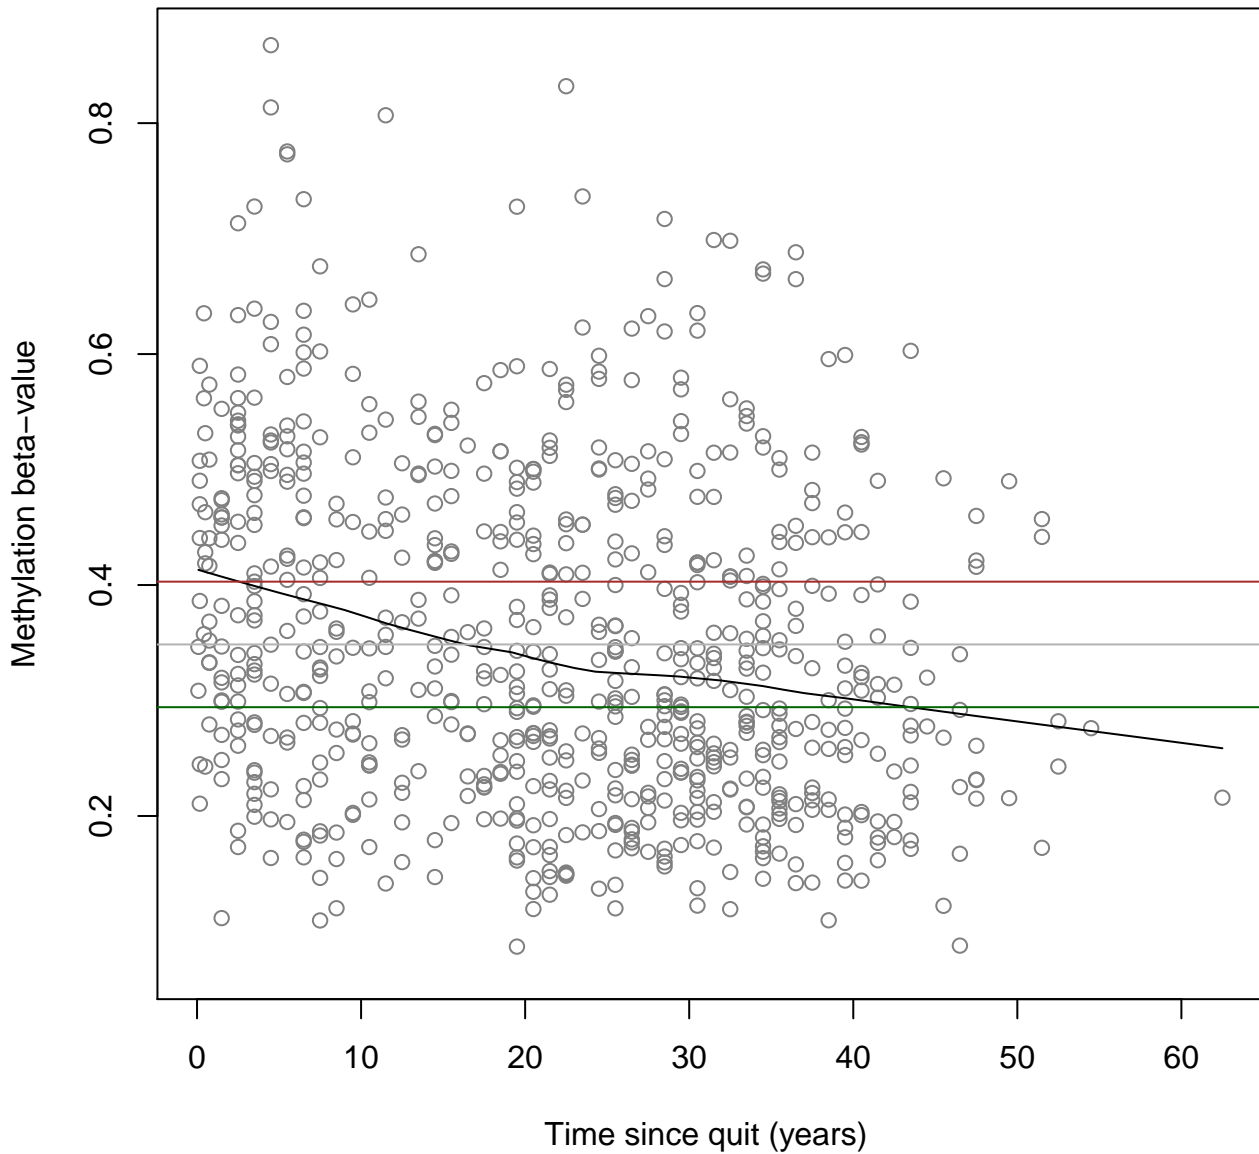

# cg17924476

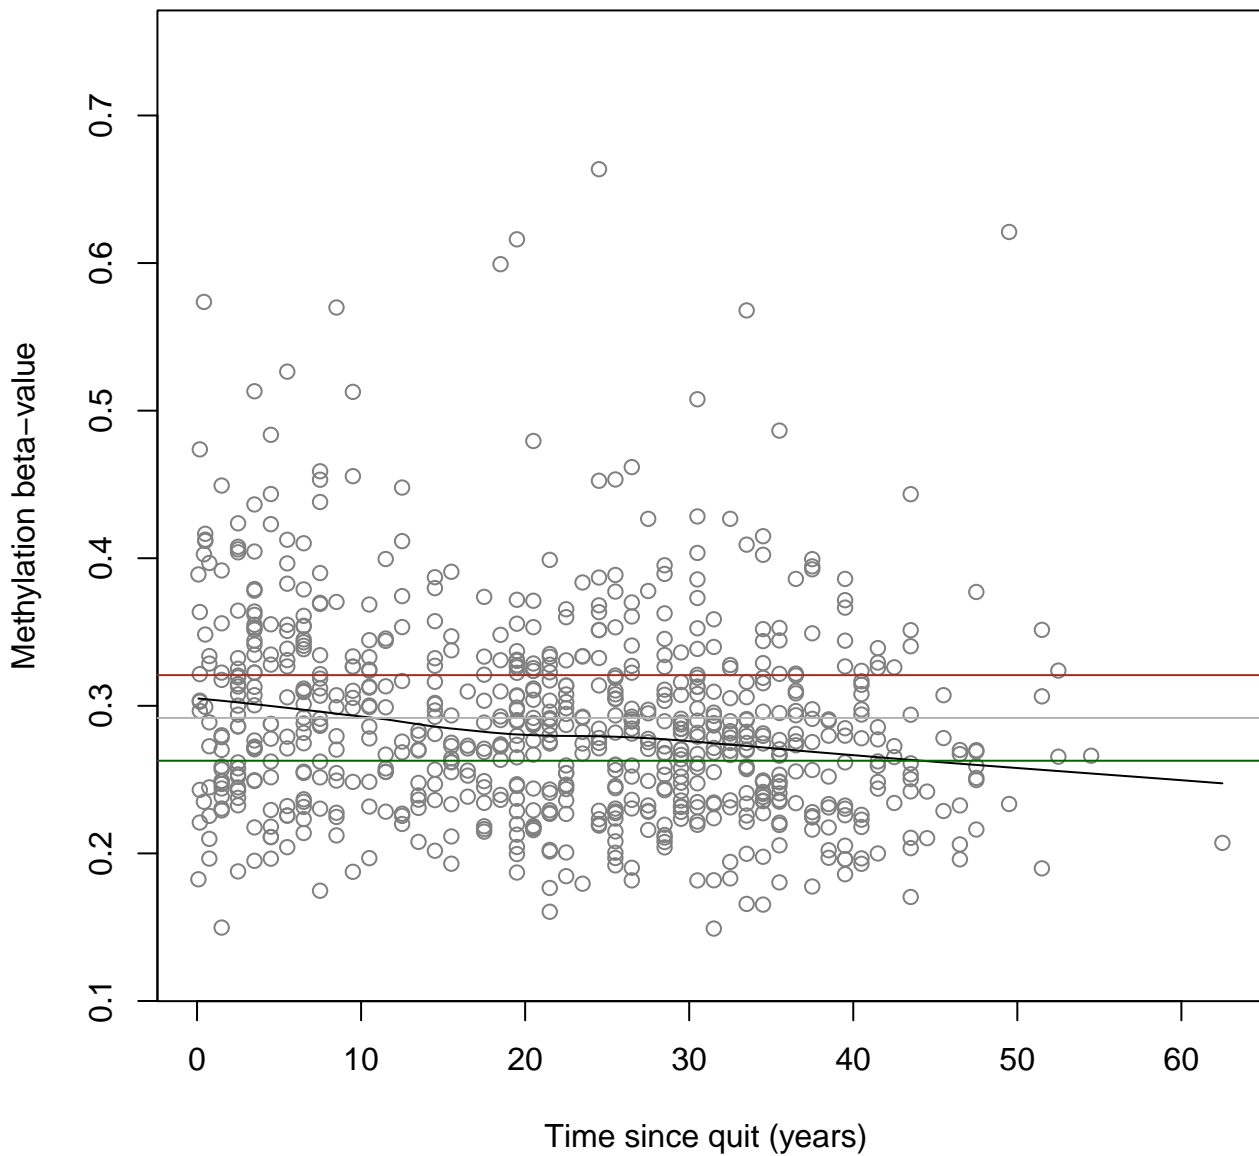



# cg19572487

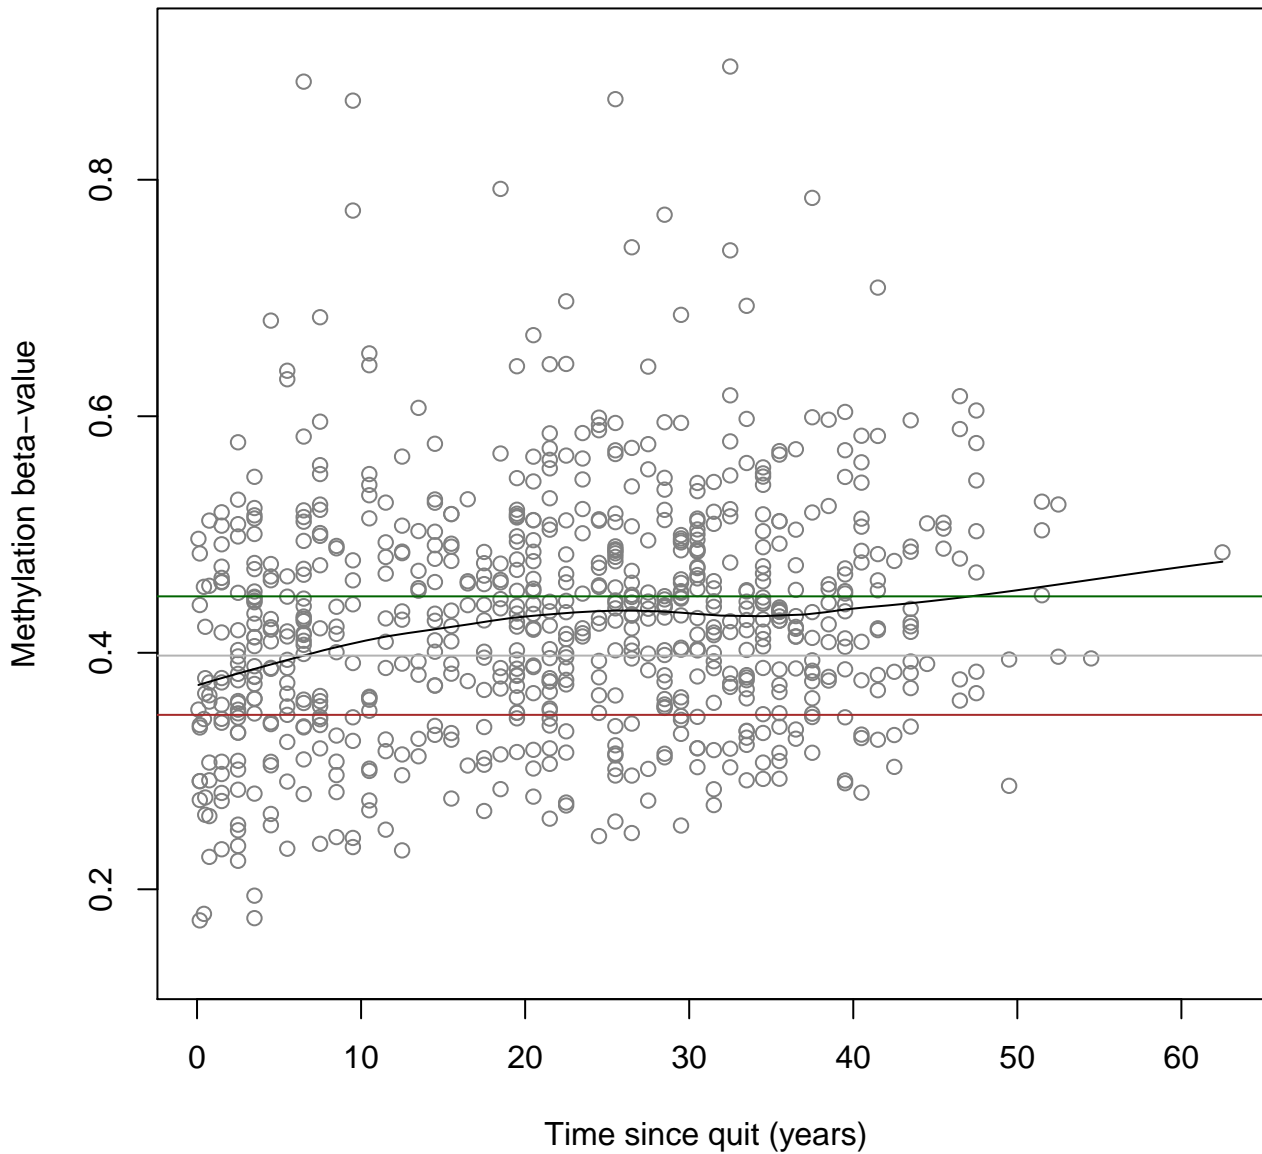

# cg21161138

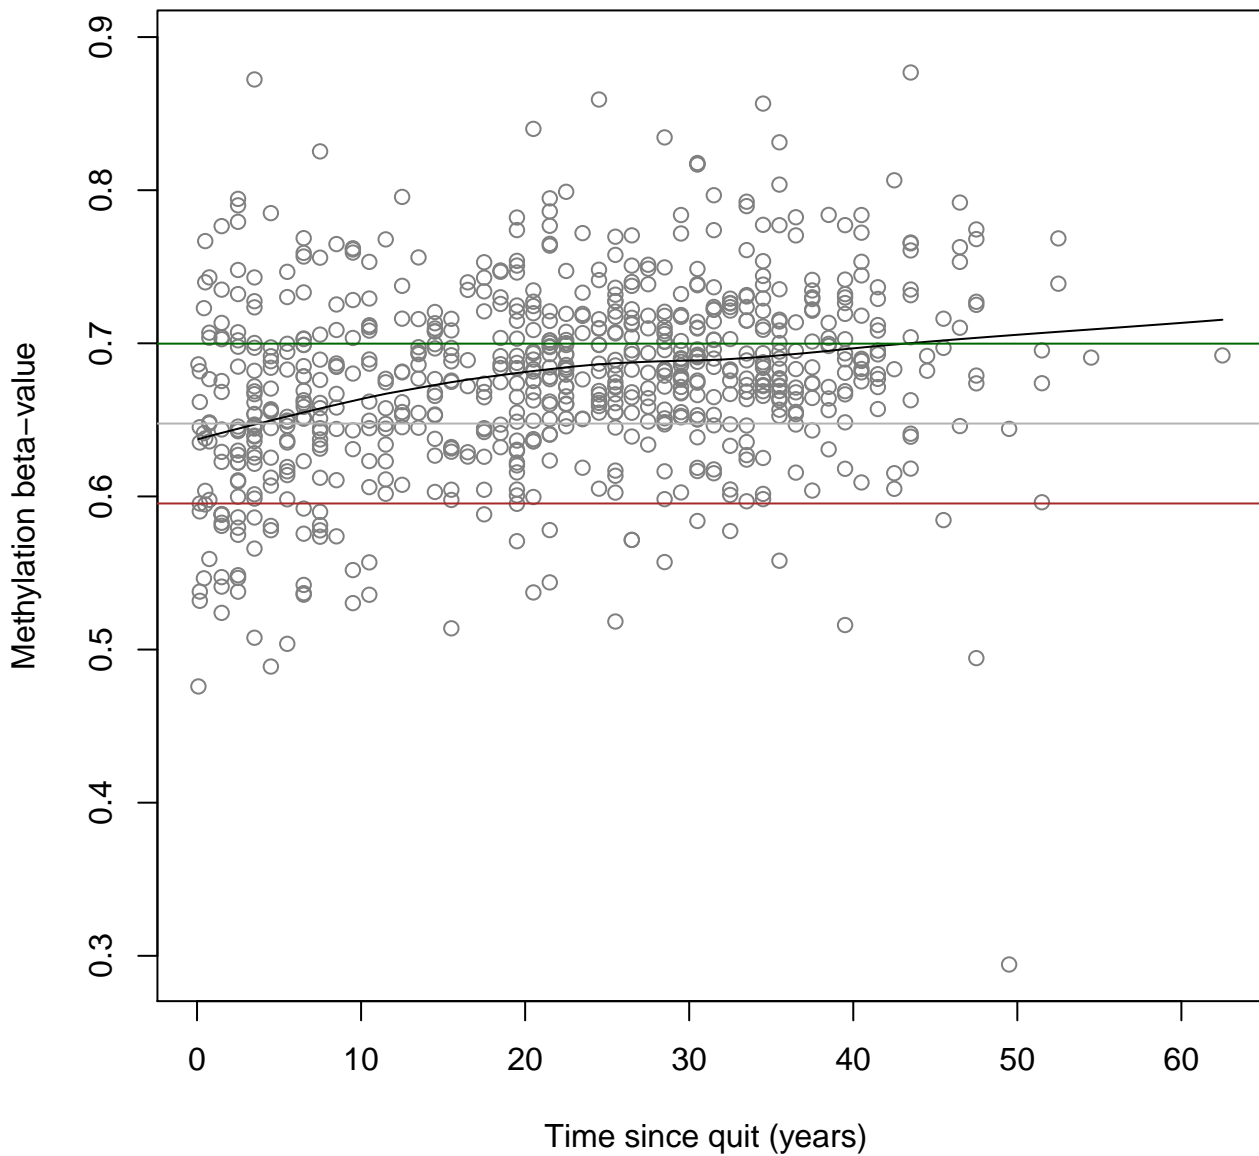

# cg21322436

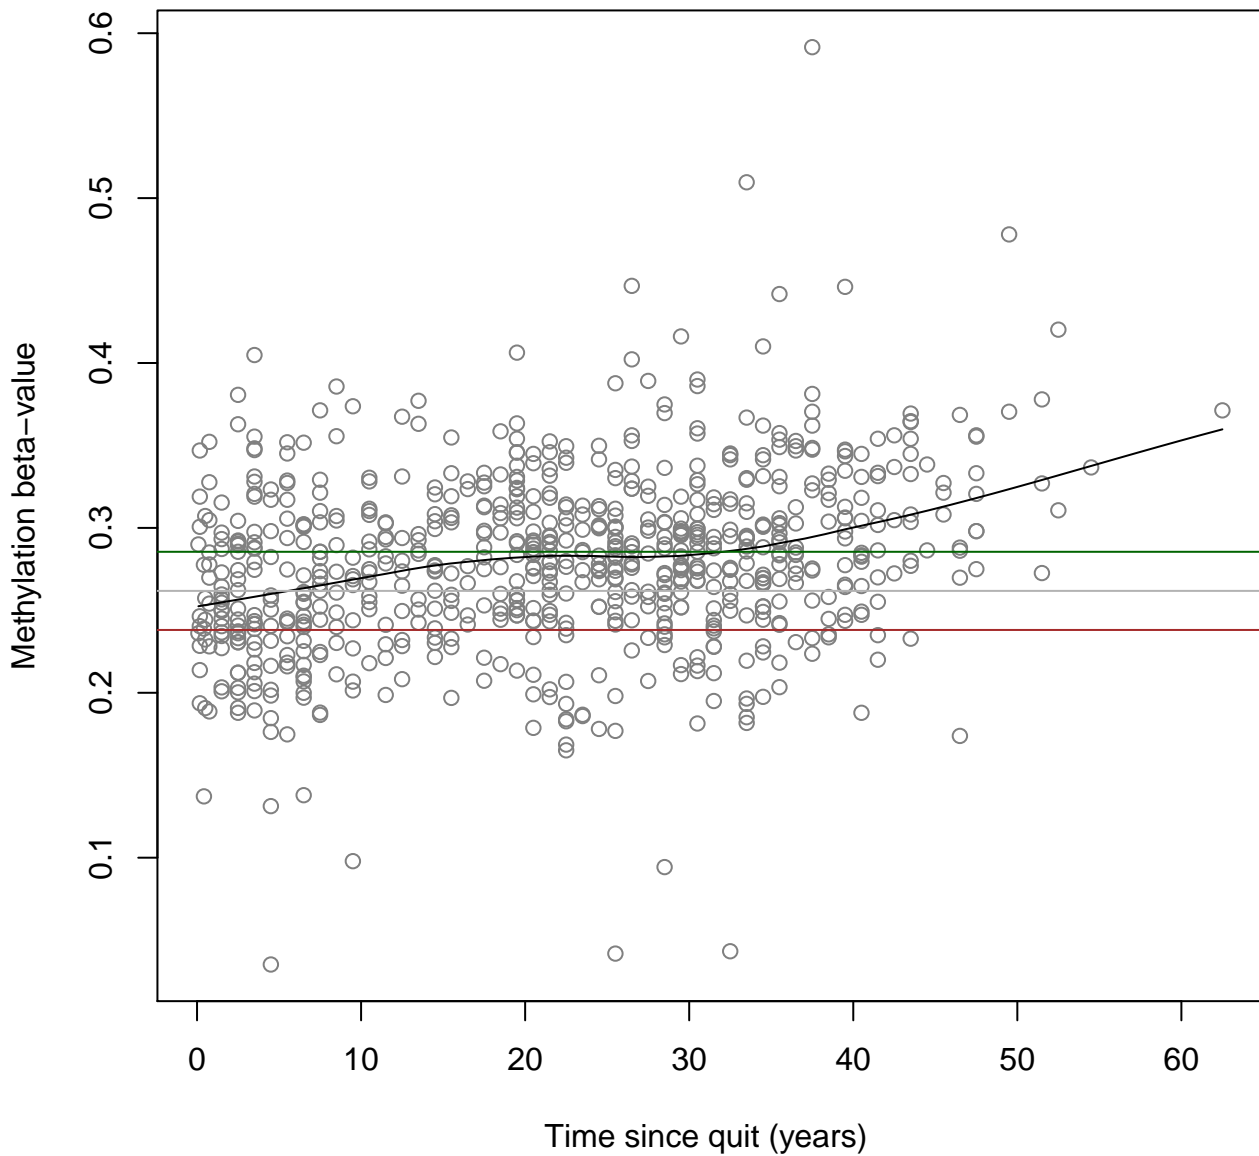

# cg21566642

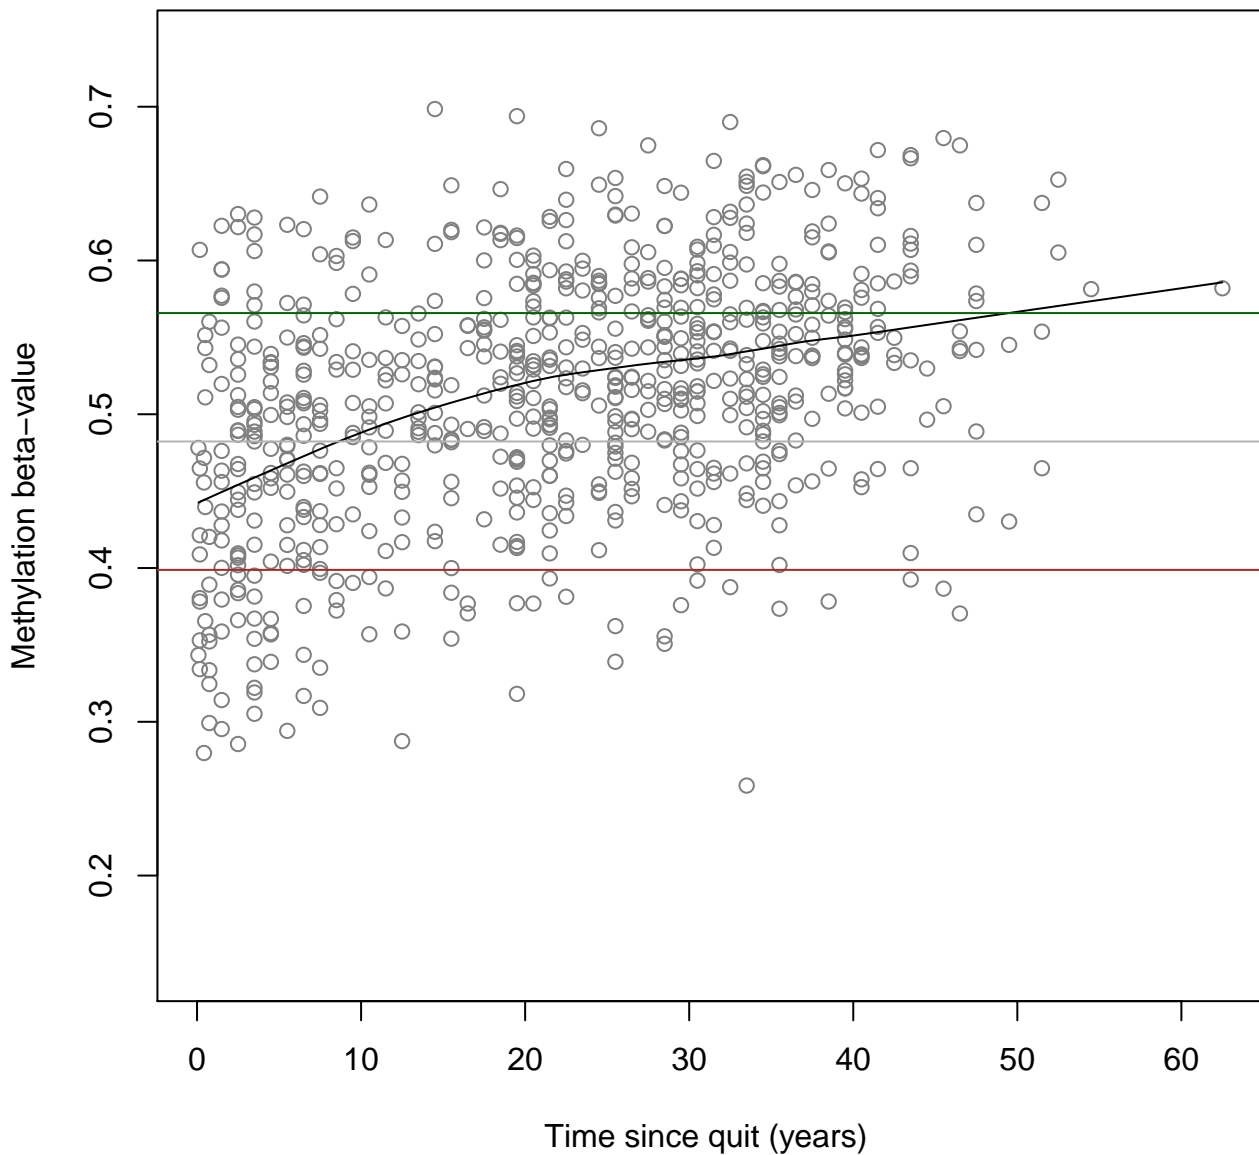

# cg23079012

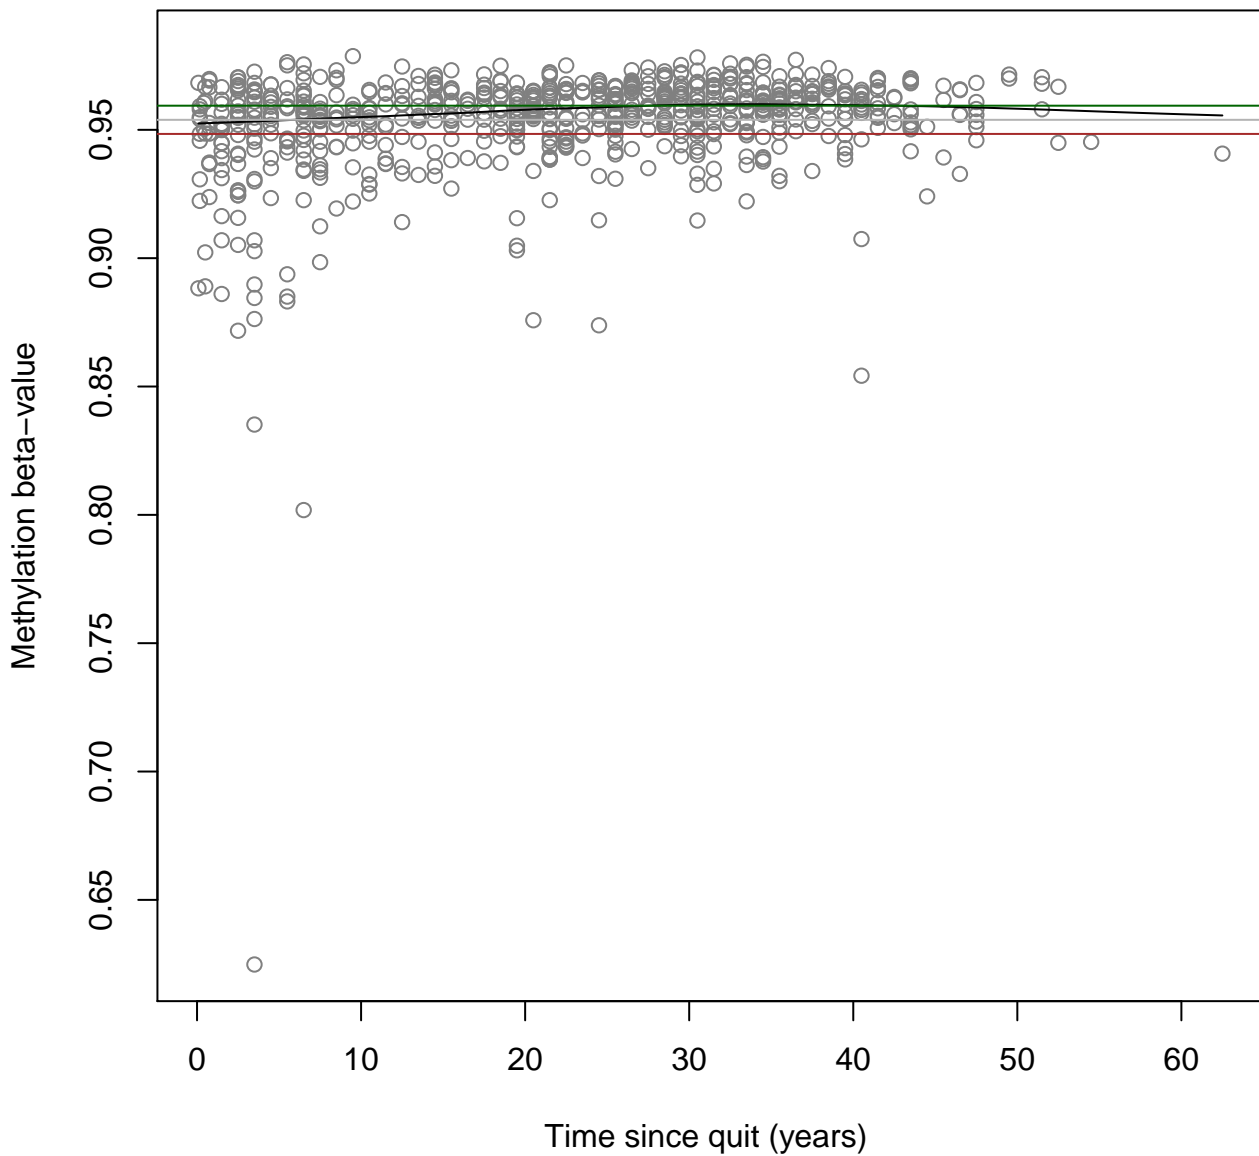

# cg23161492

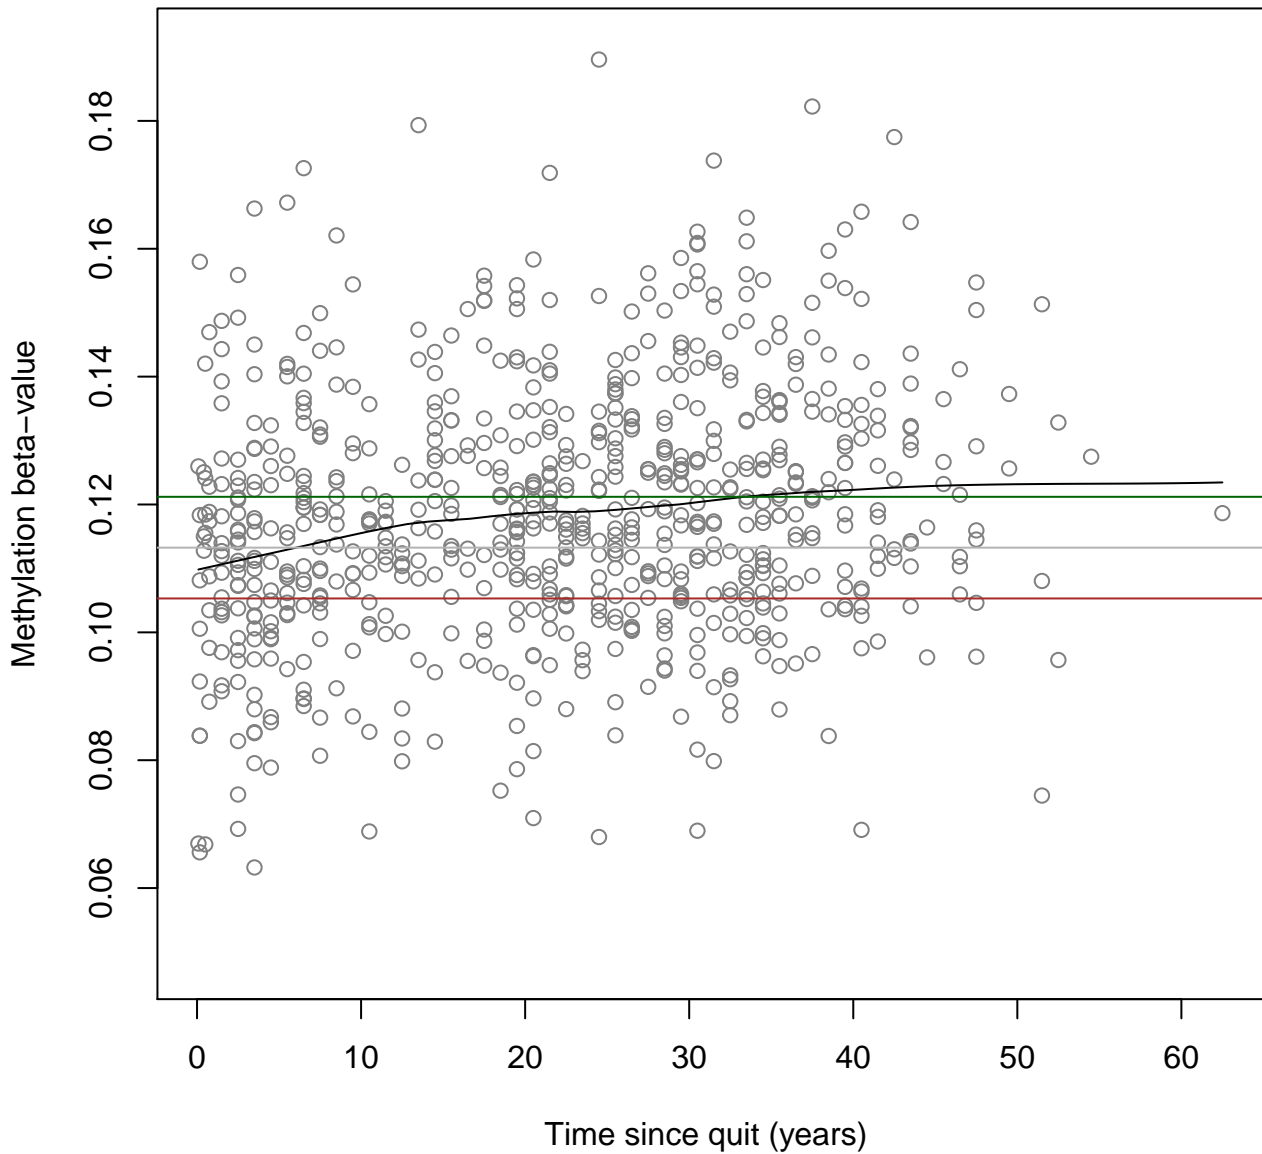

# cg23565821

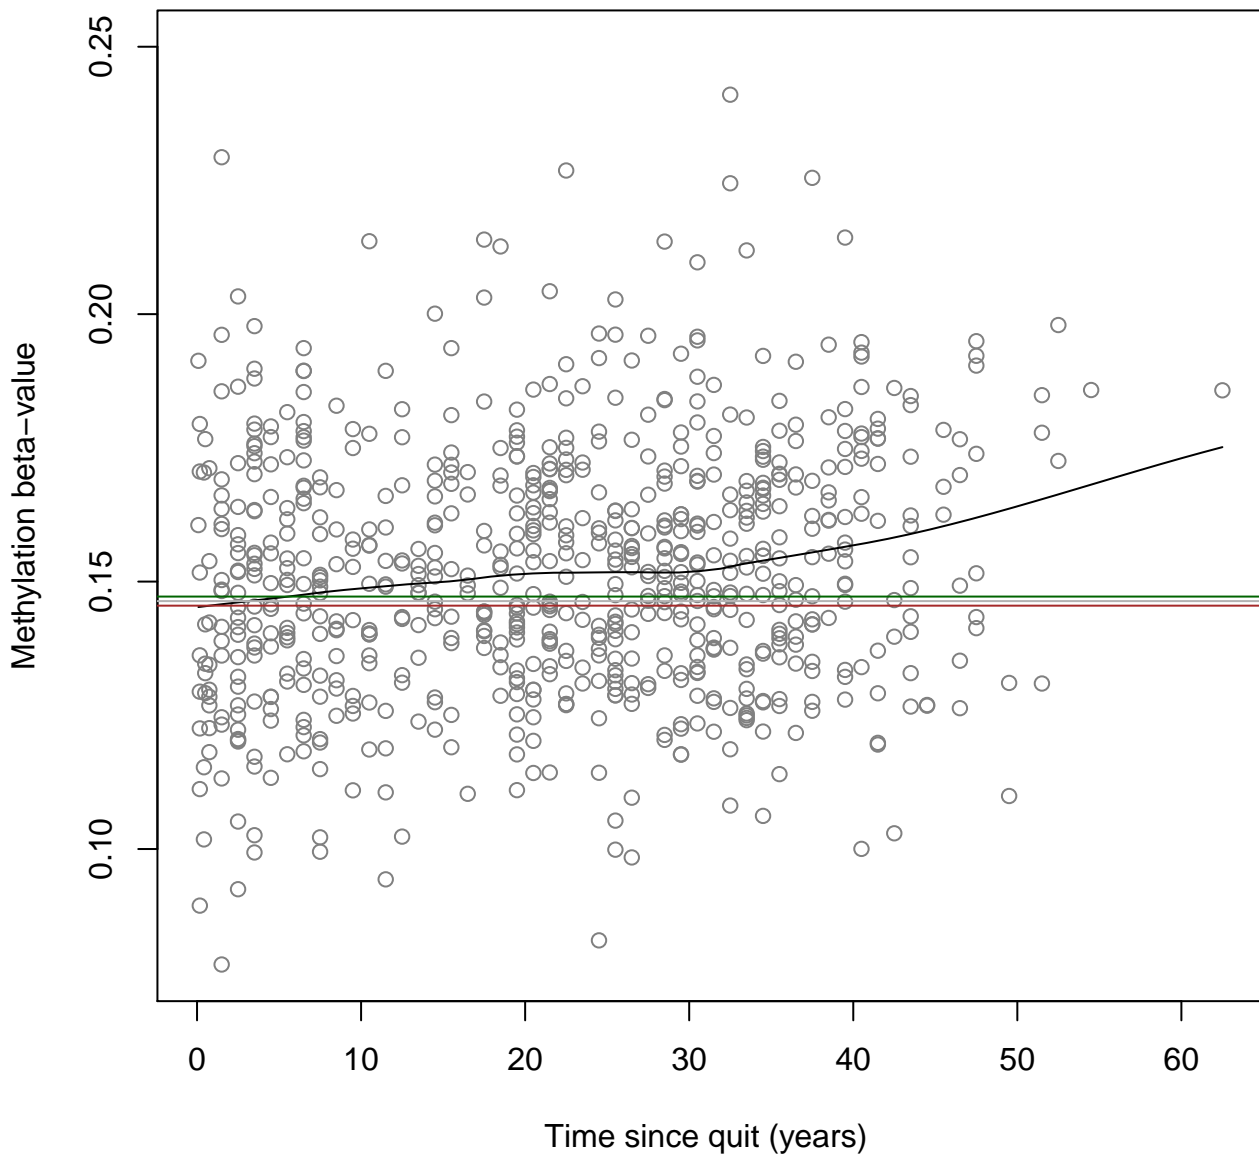

# cg23771366

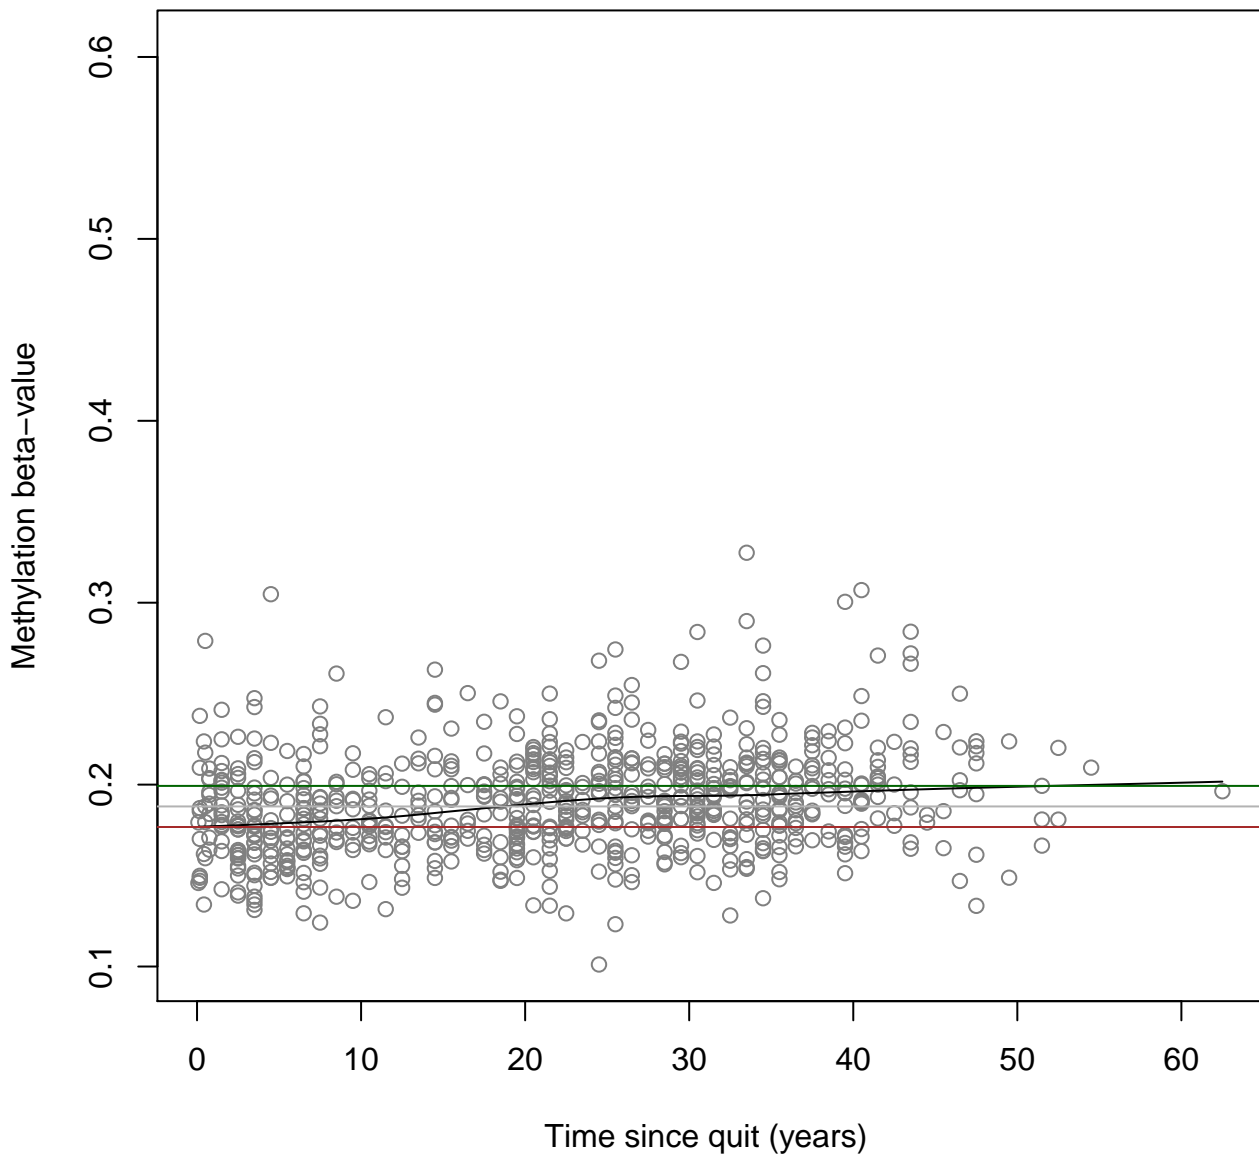



# cg24540678

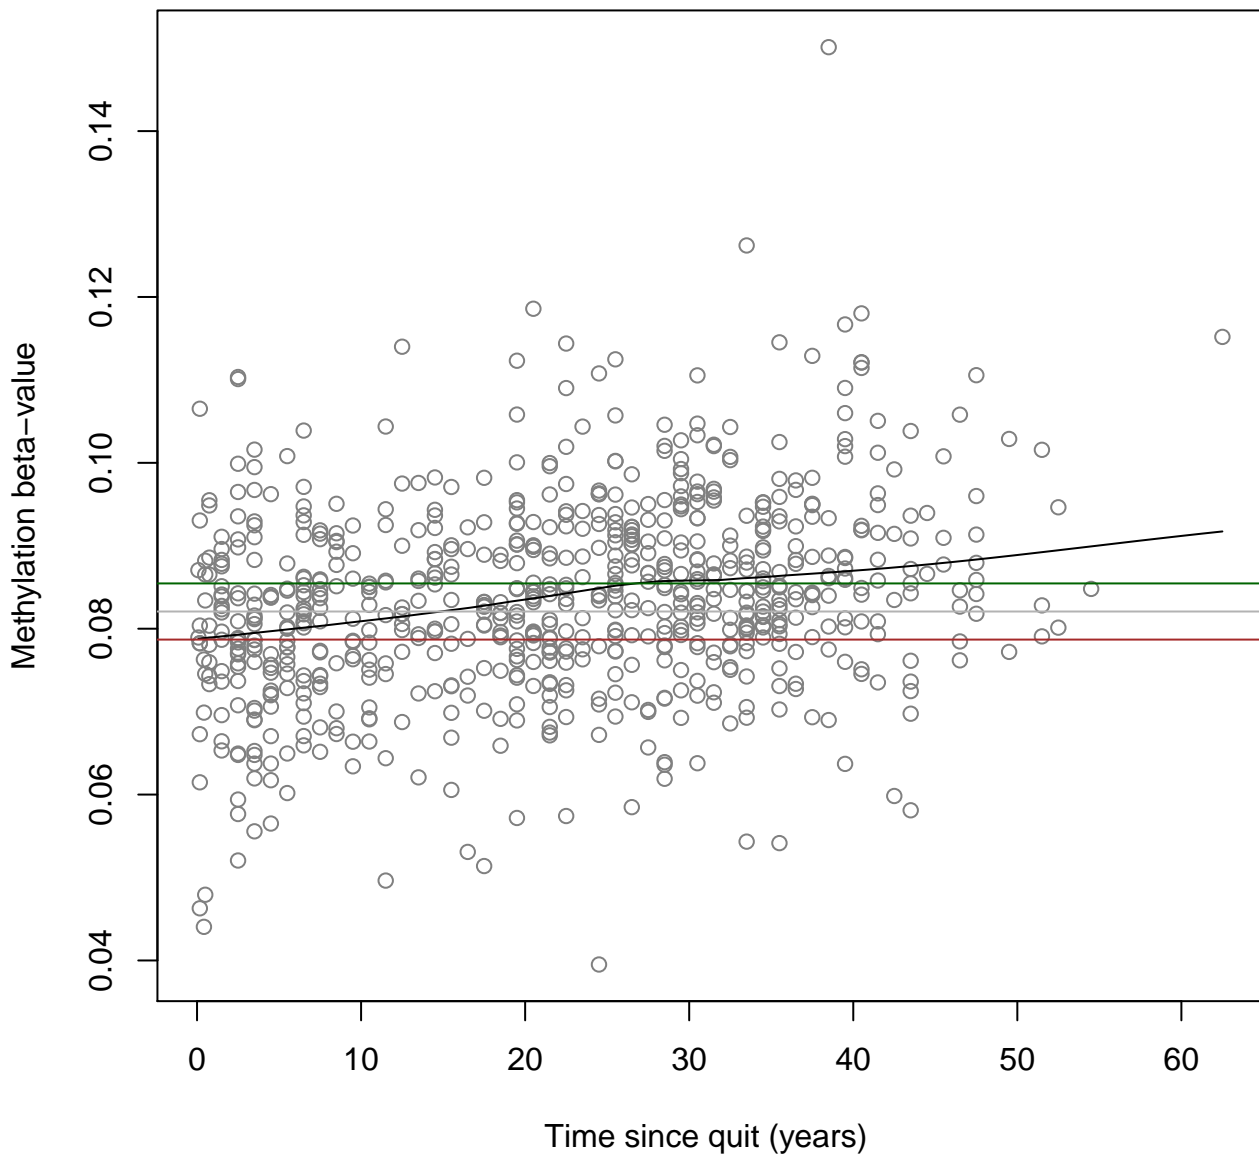

# cg24859433

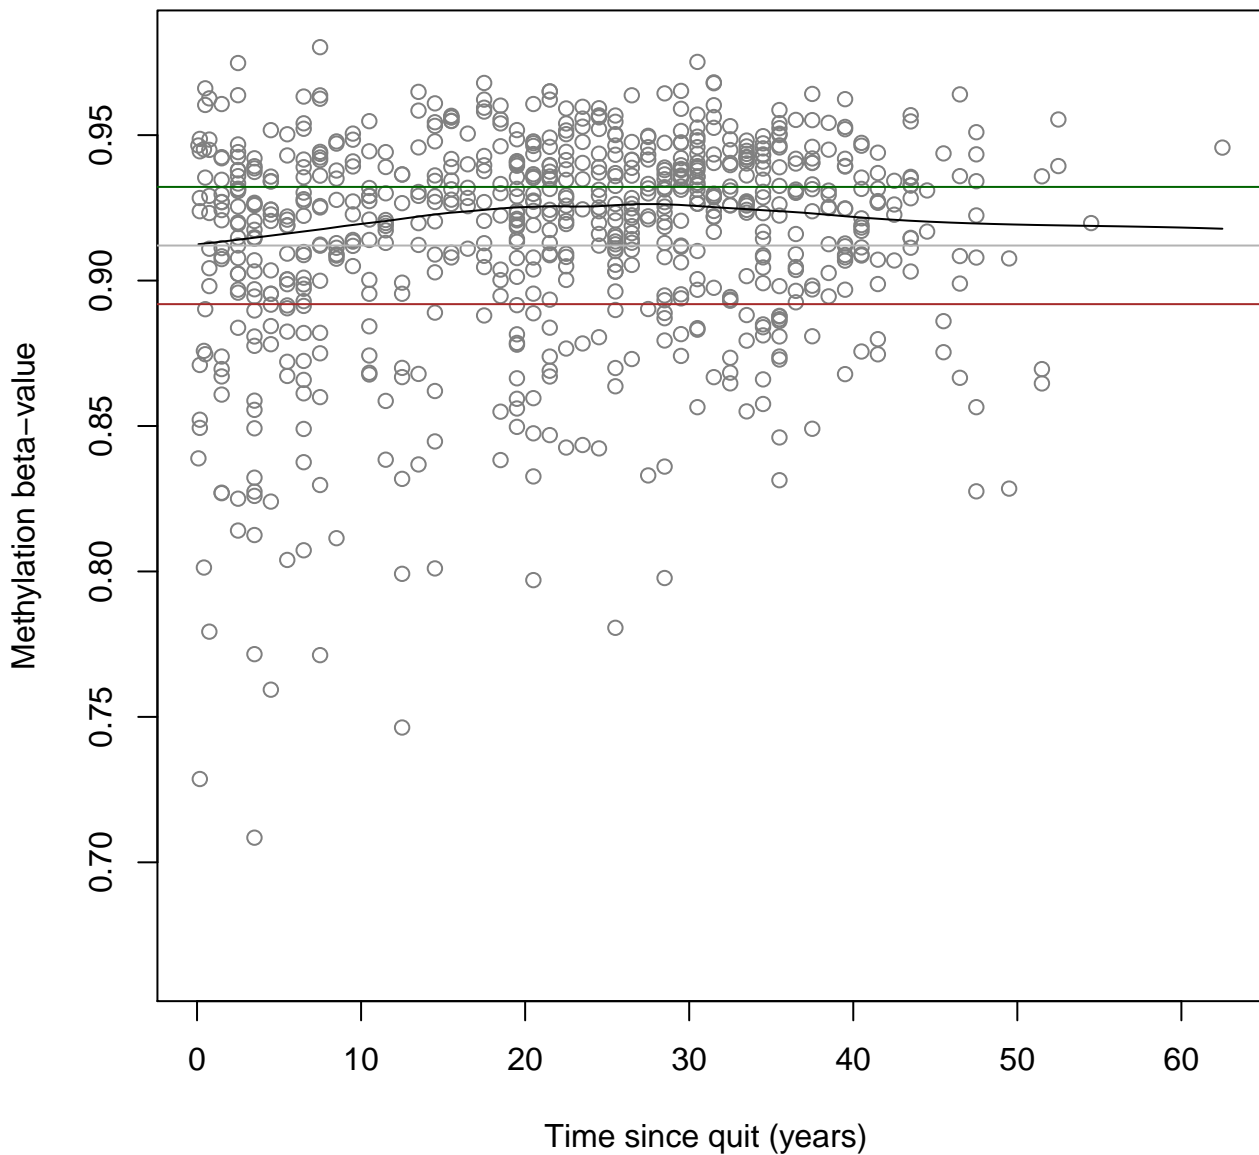

# cg25189904

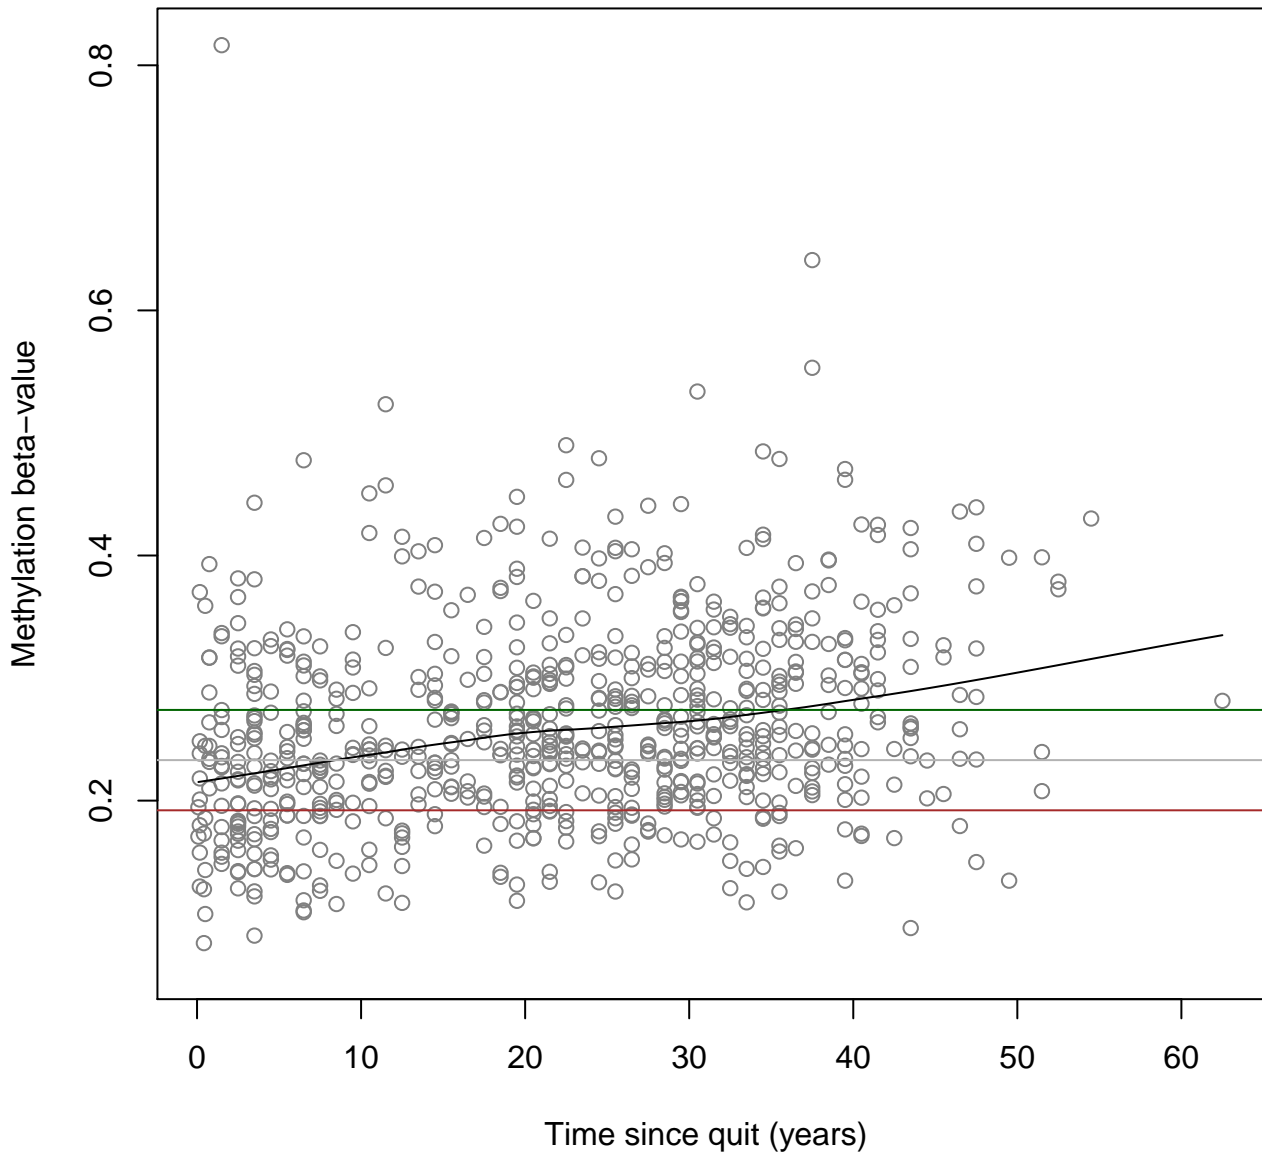

# cg25949550

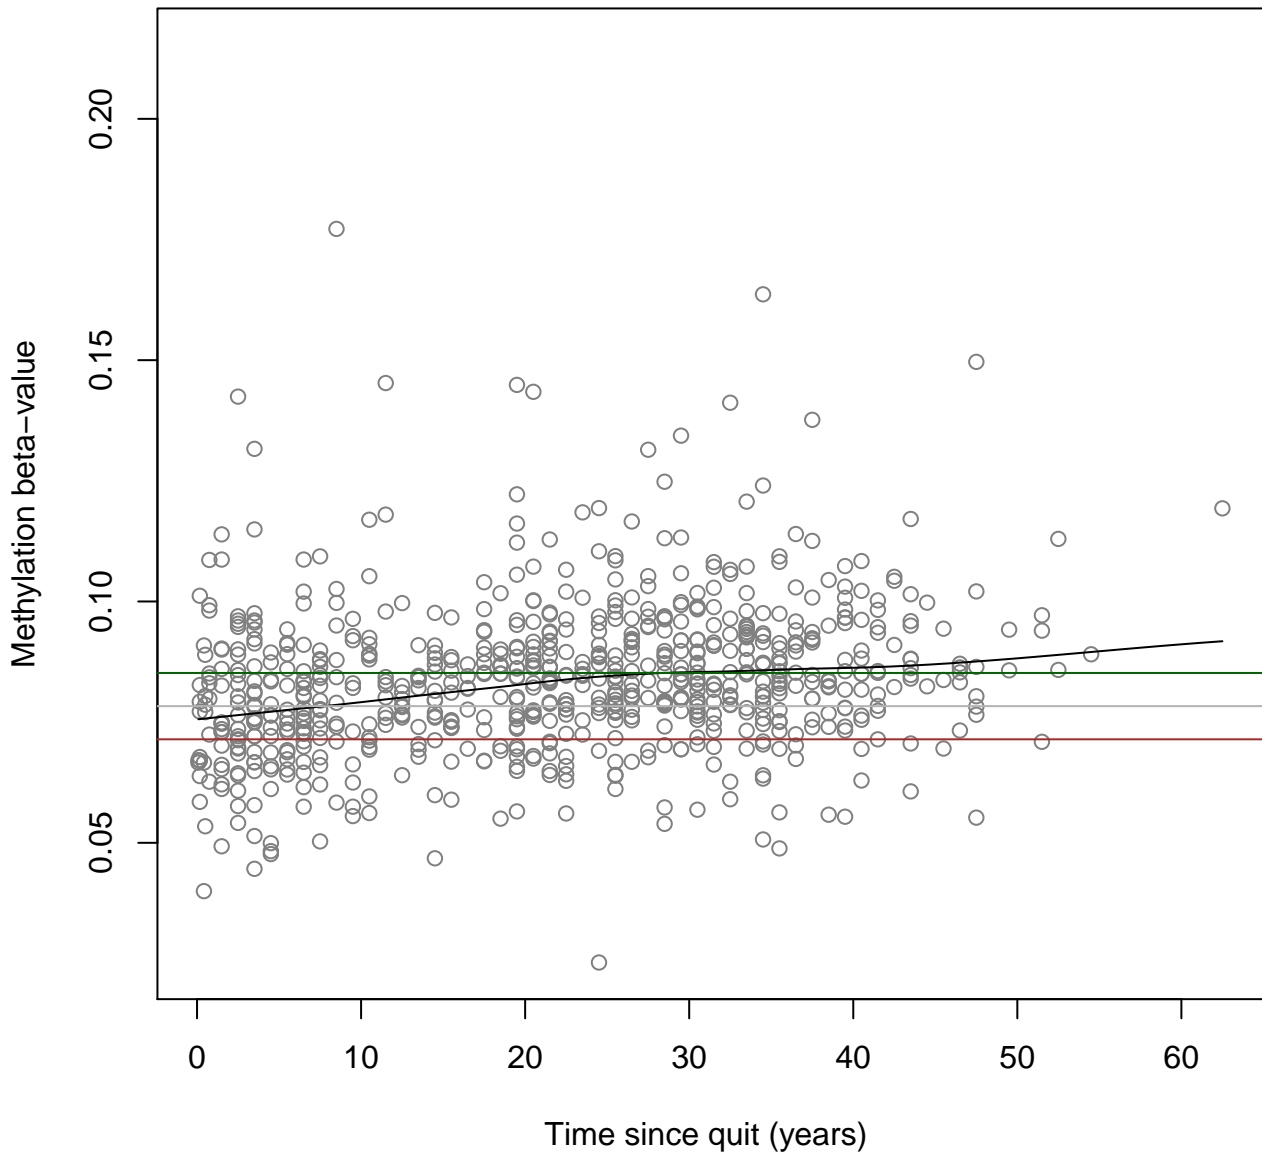

Supplement: pone.0063812.s002.pdf [file pone.0063812.s002.pdf]
