# Supplementary material for: Tobacco Smoking Leads to Extensive Genome-Wide Changes in DNA Methylation
Source: PubMed Central journal article supplement (PMC3656907; doi:10.1371/journal.pone.0063812), 2013-05-17

# cg01940273

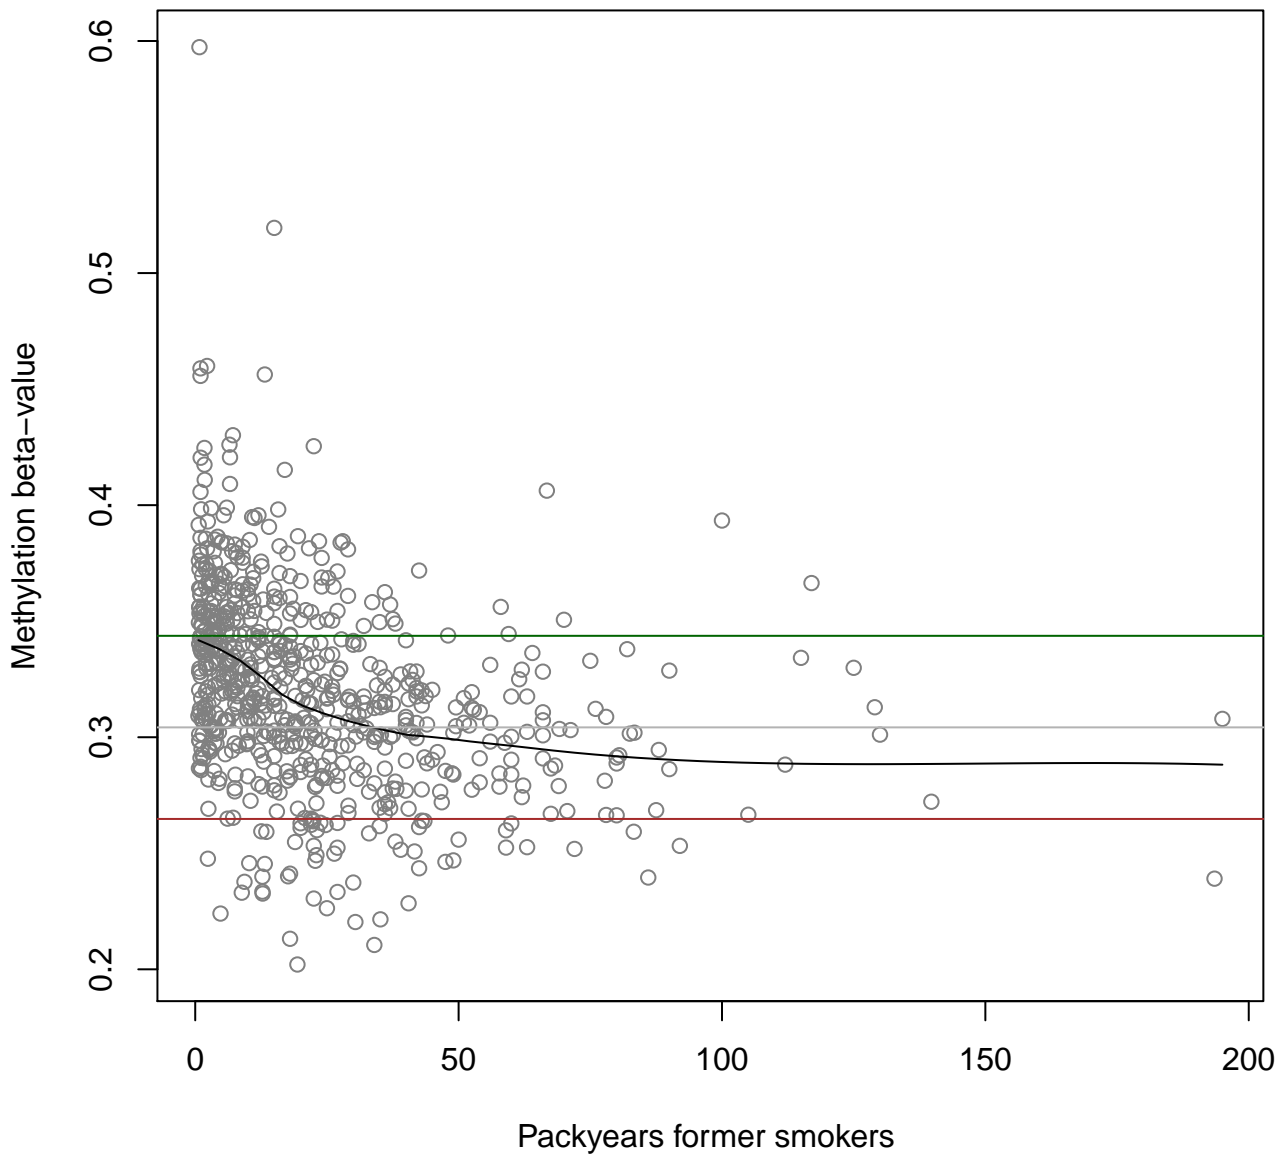

# cg03636183

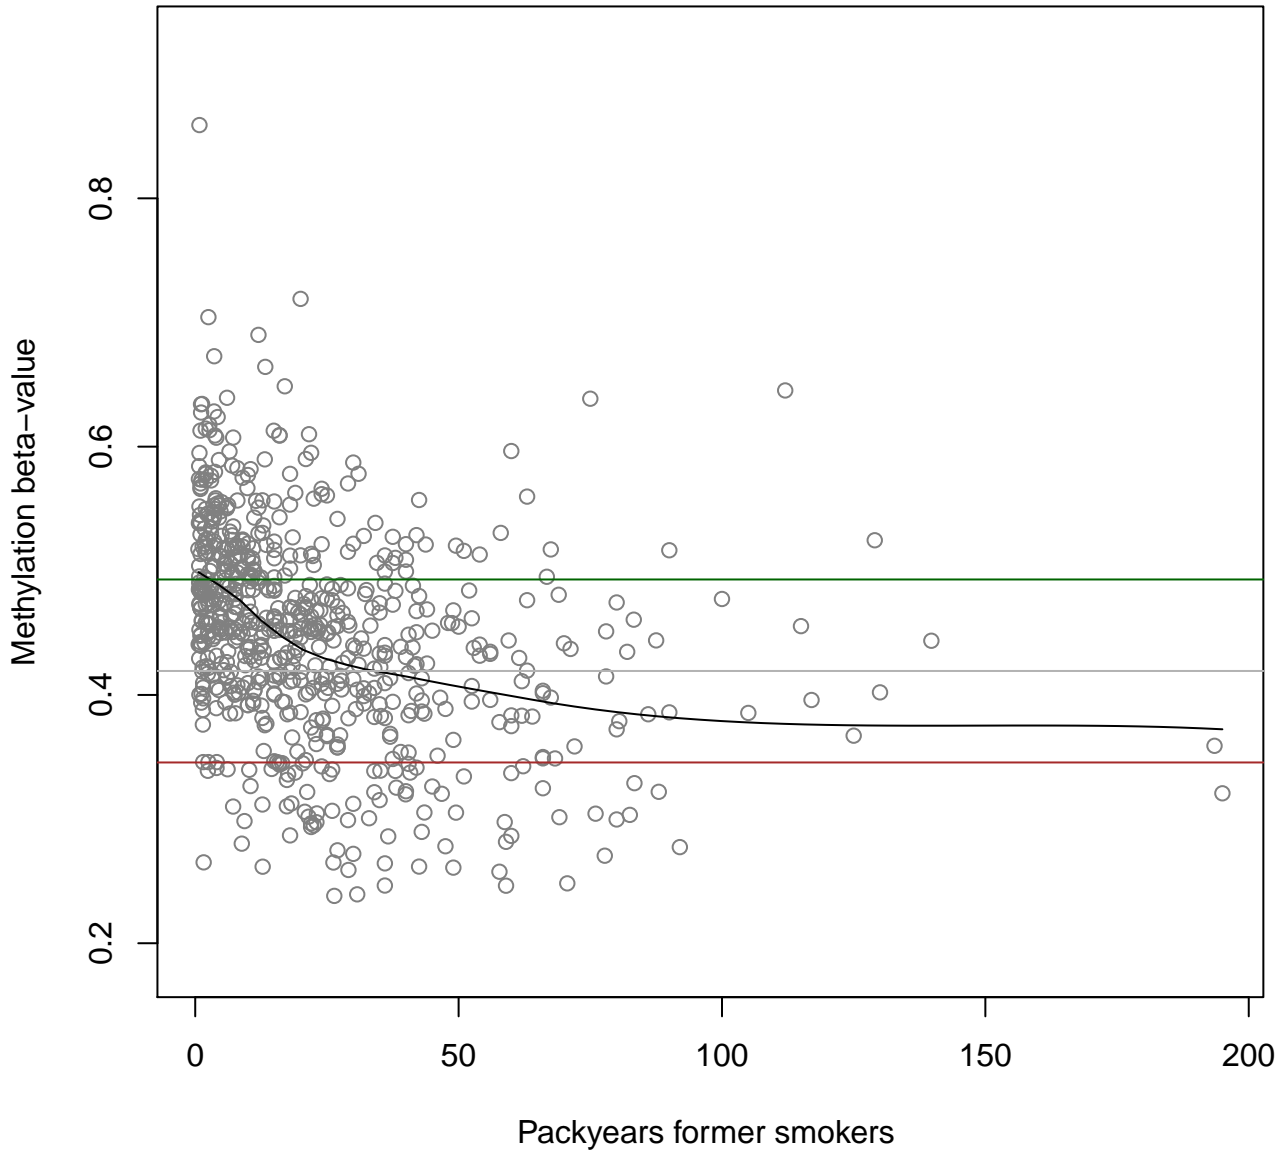

# cg05575921

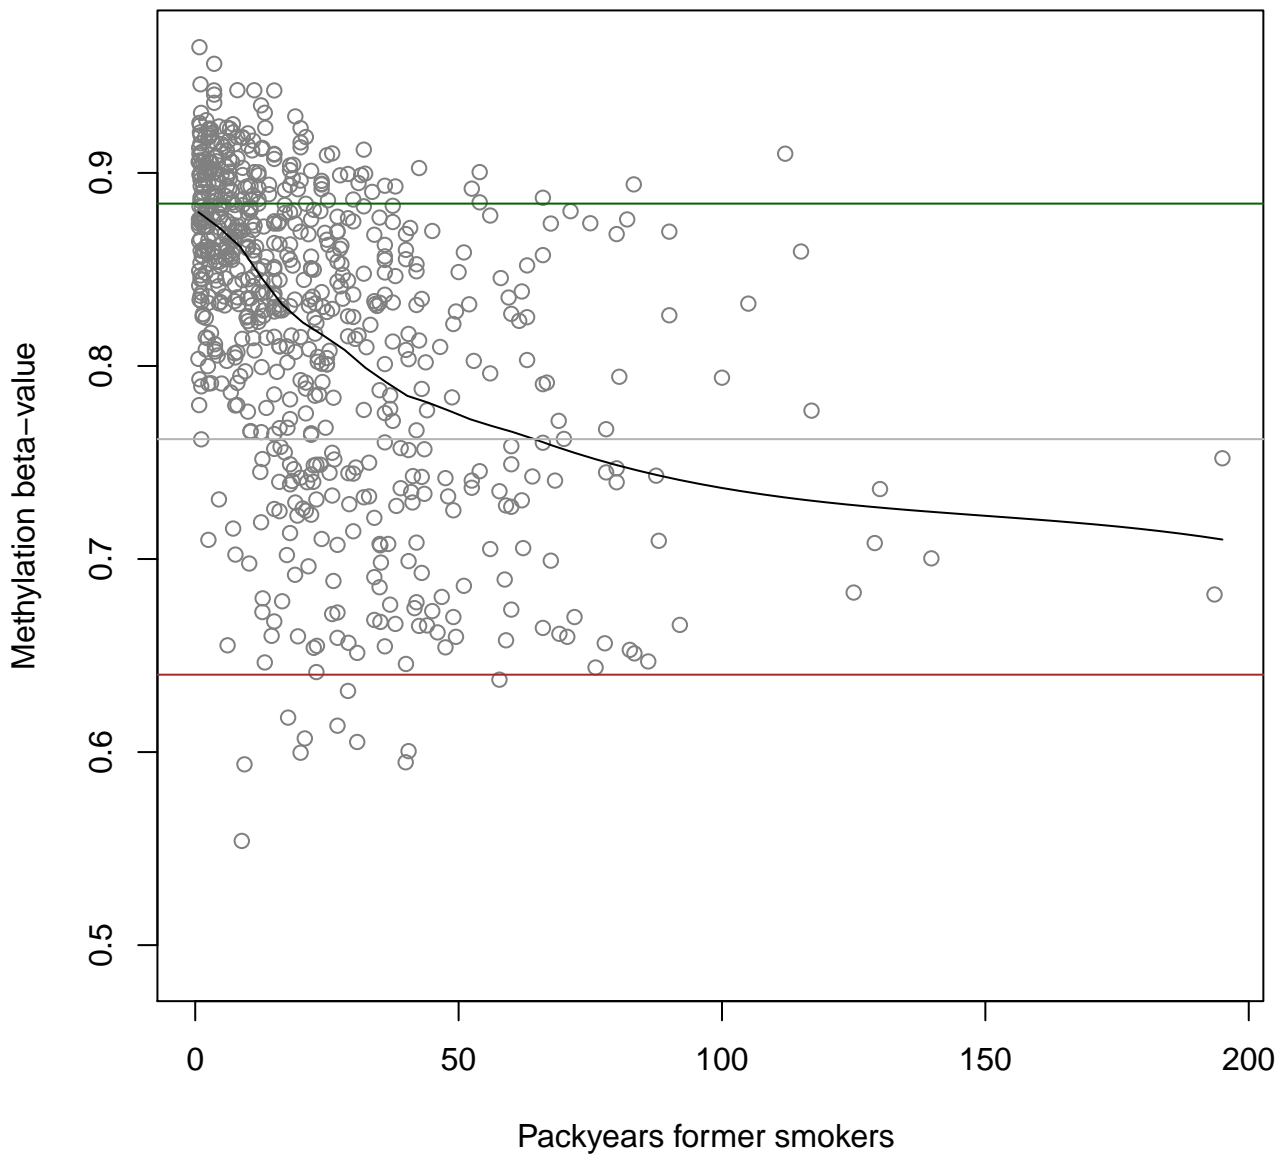

# cg05951221

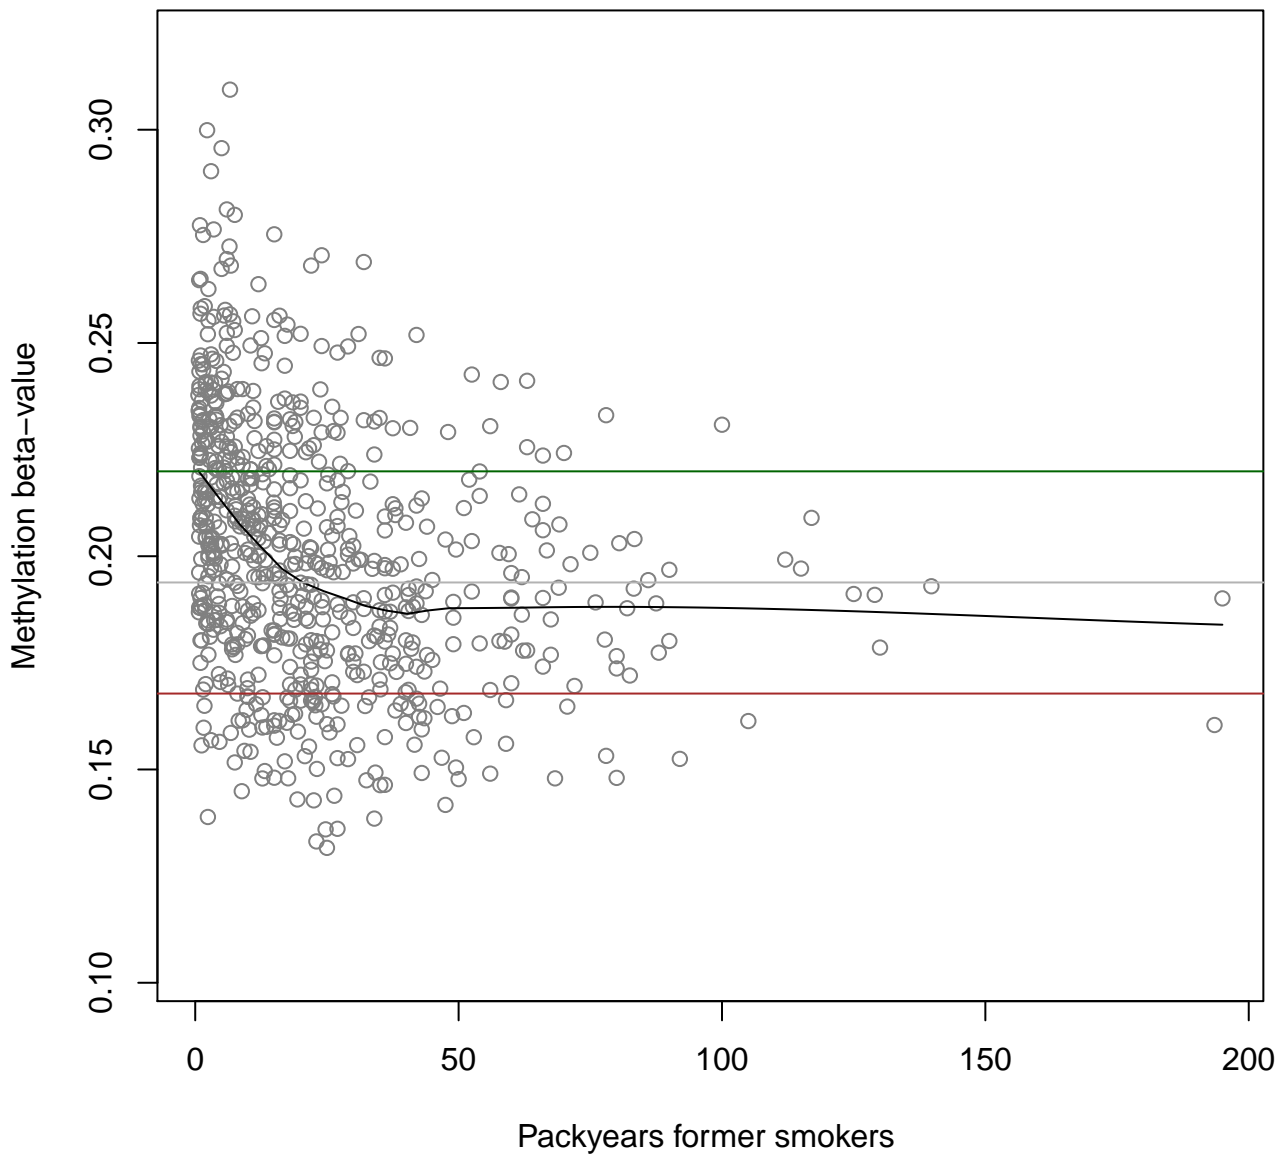

# cg06126421

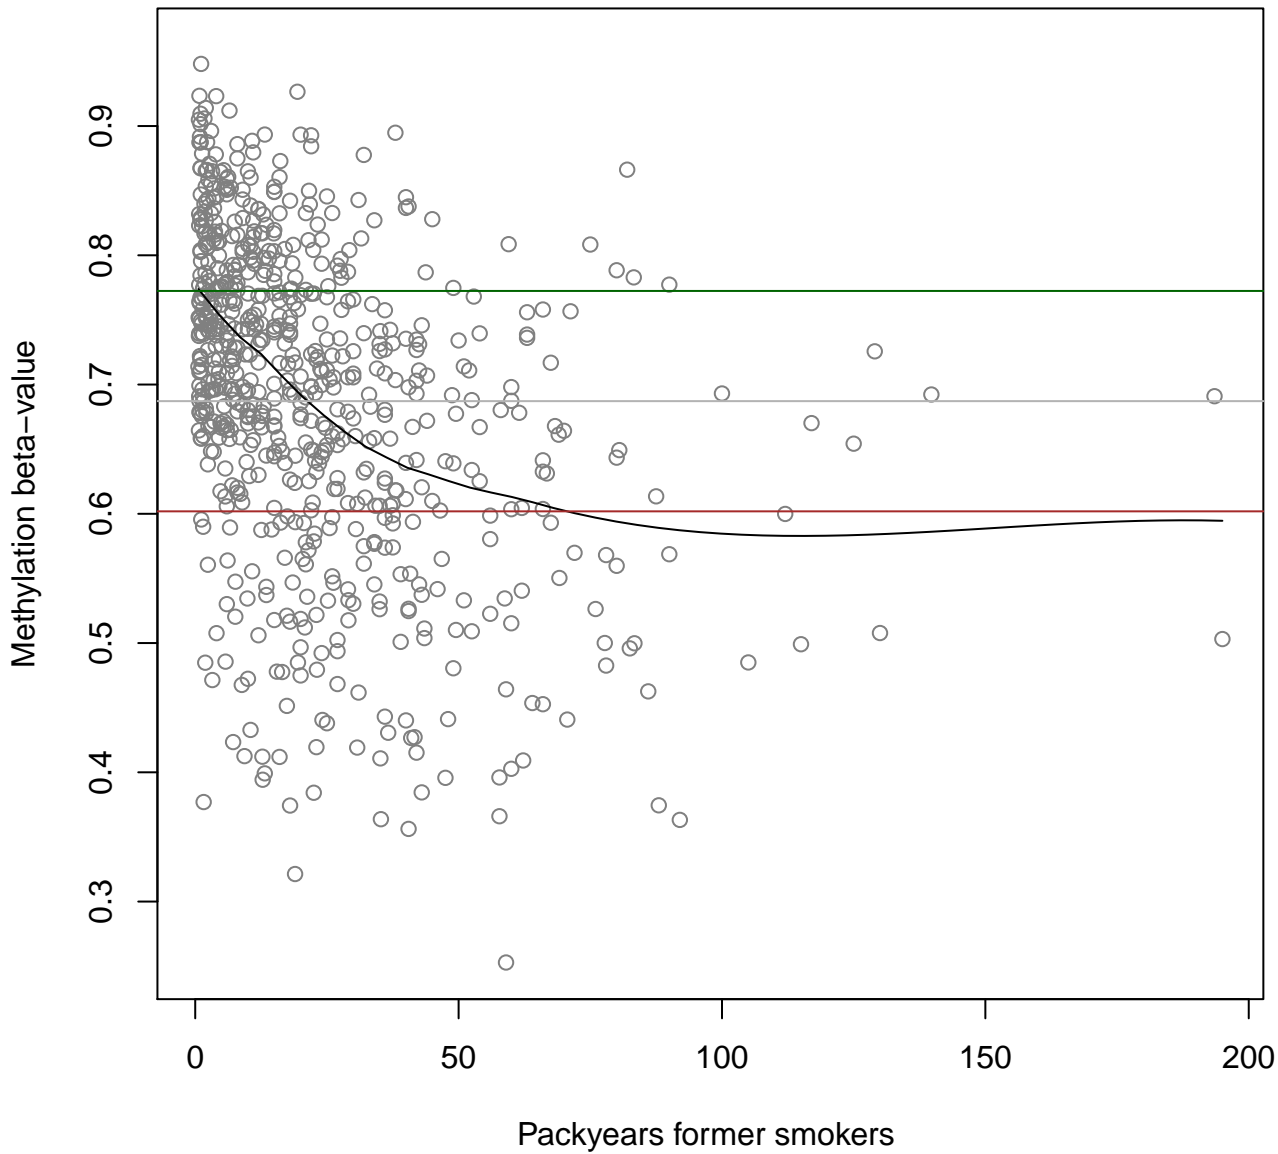

# cg06644428

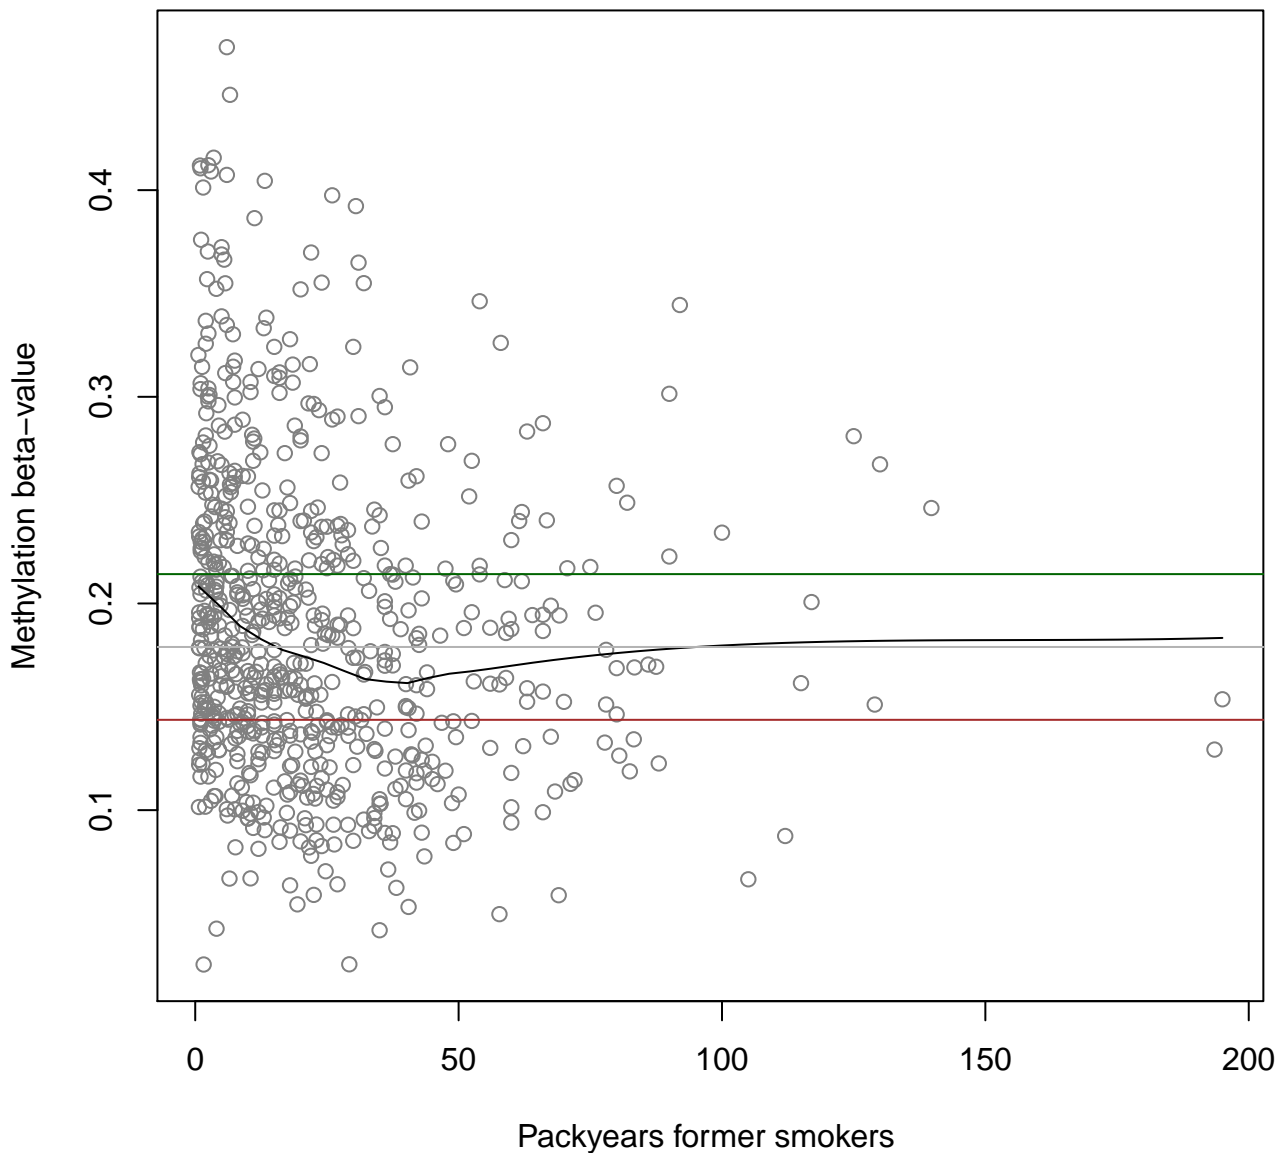

# cg11554391

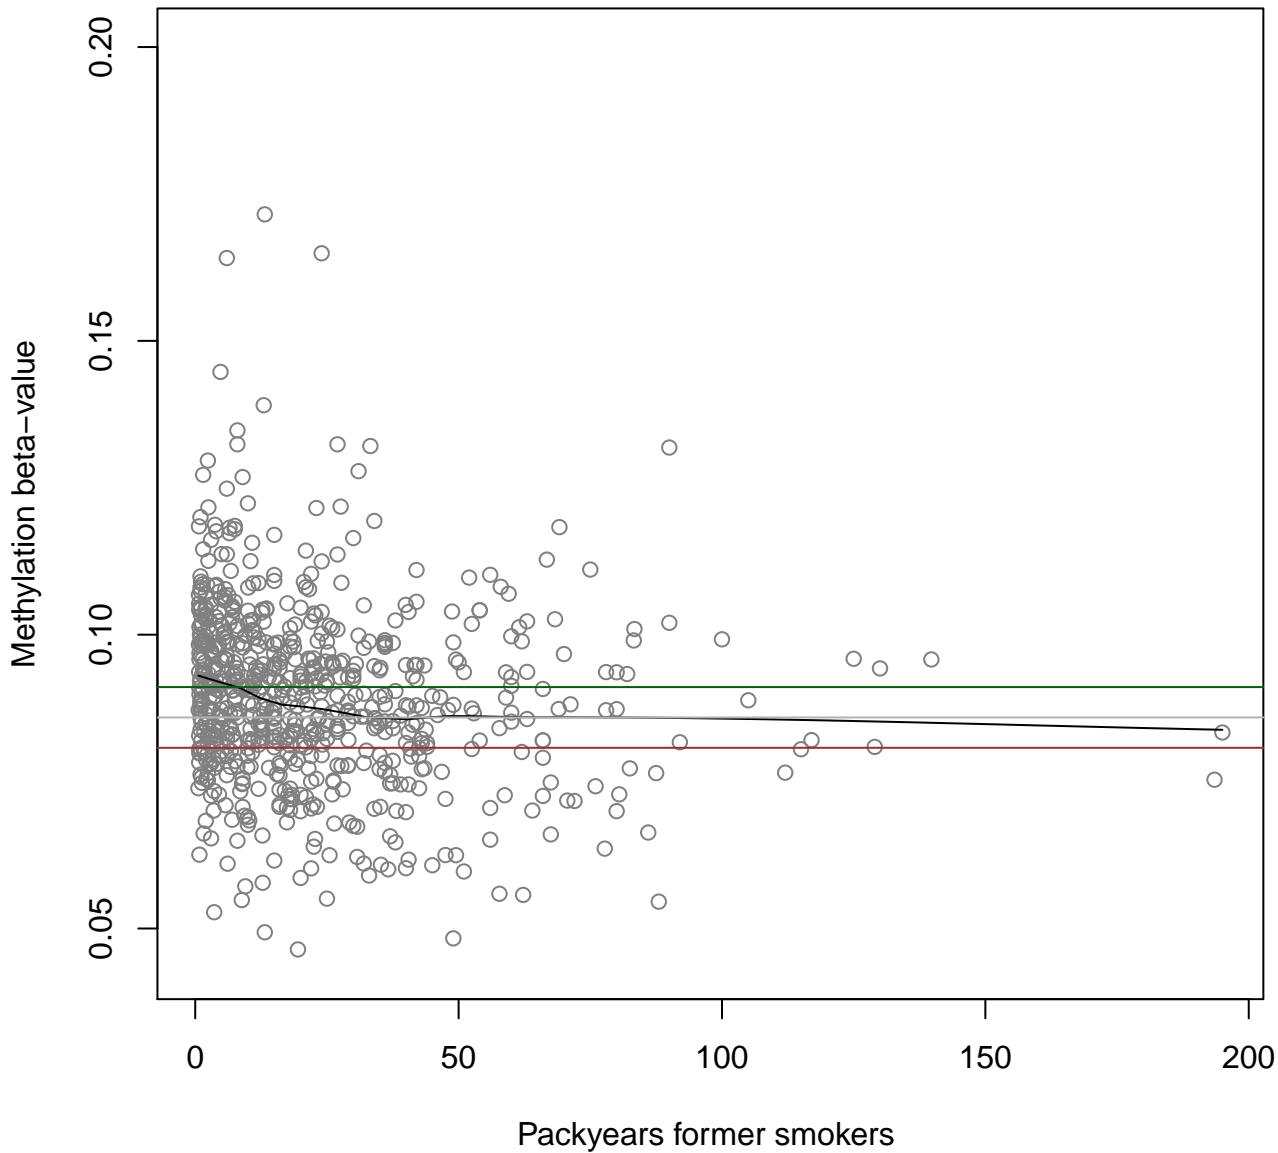

# cg11660018

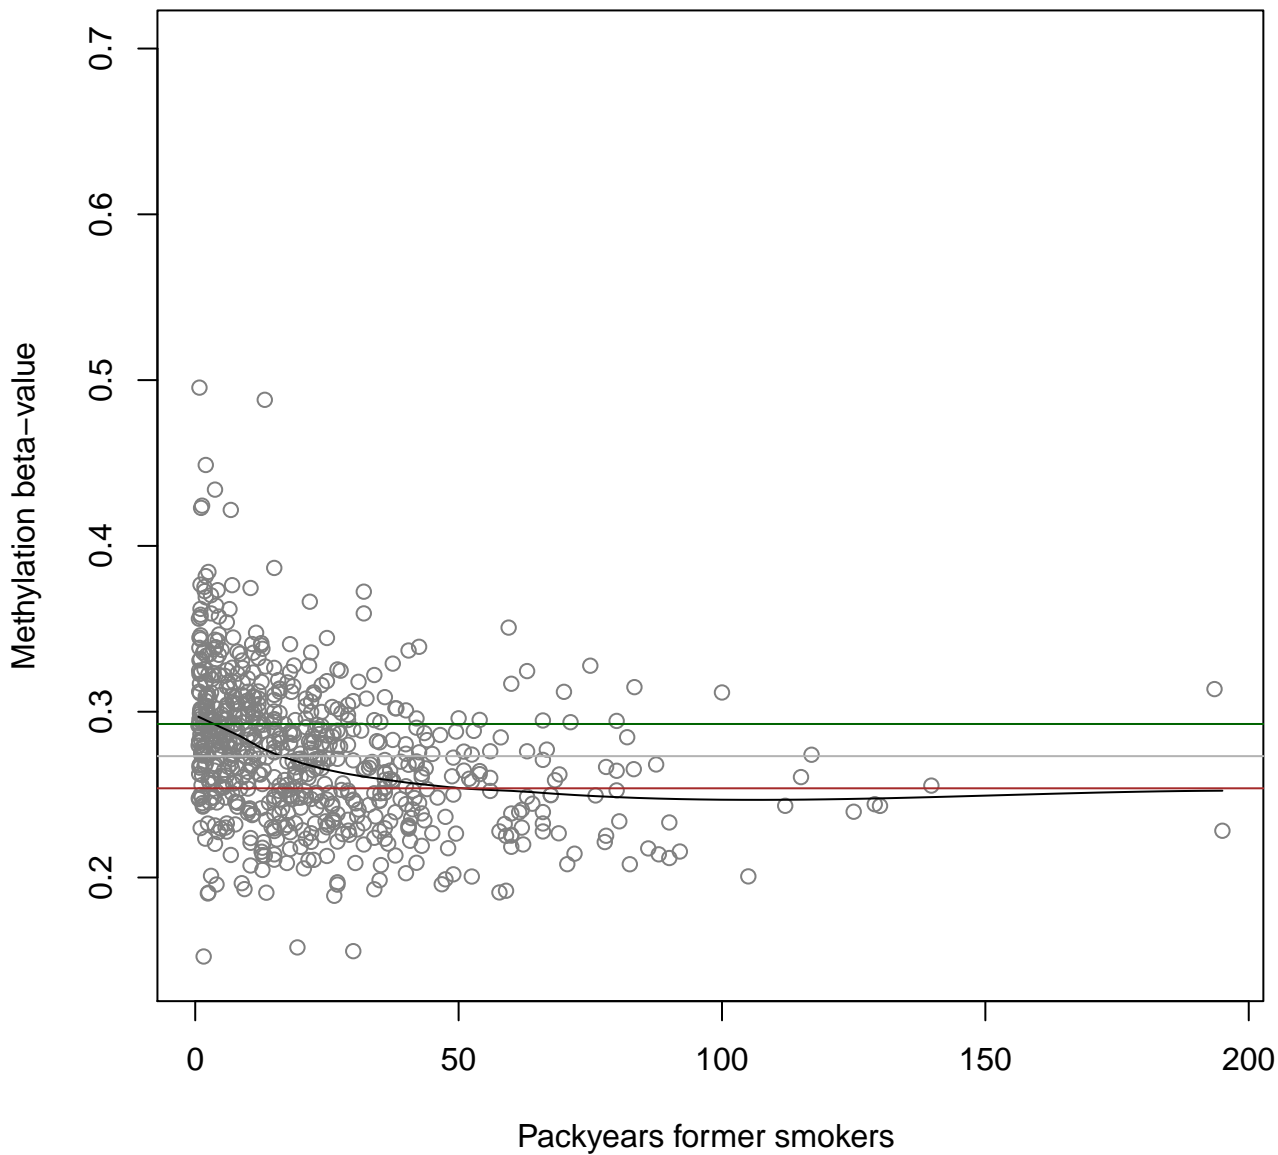





# cg21161138

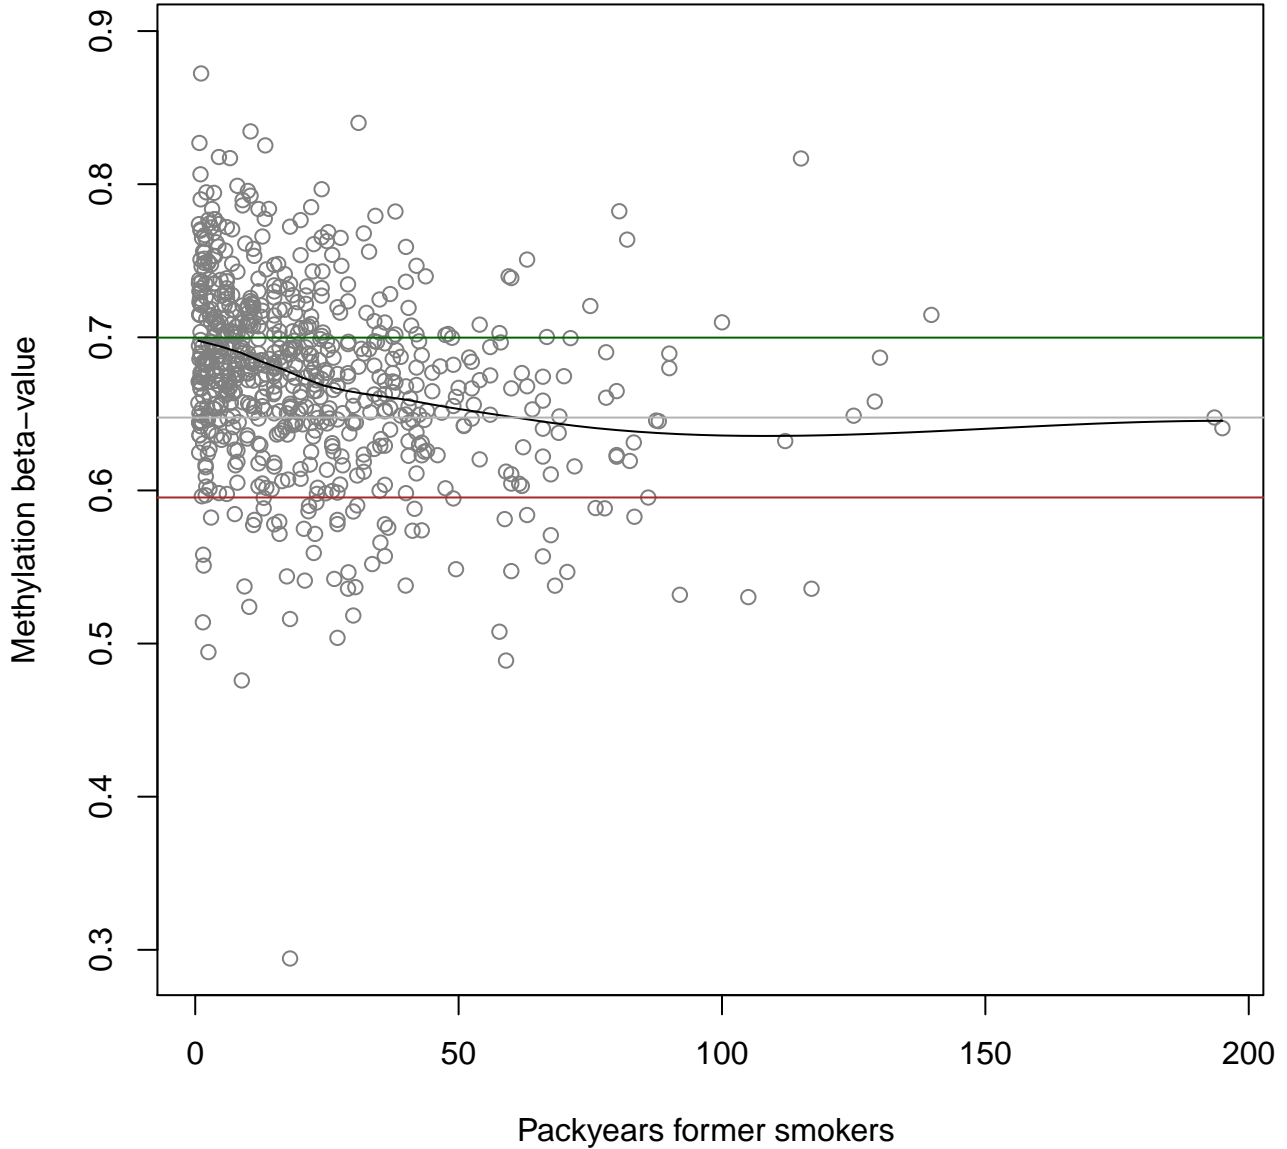

# cg21566642

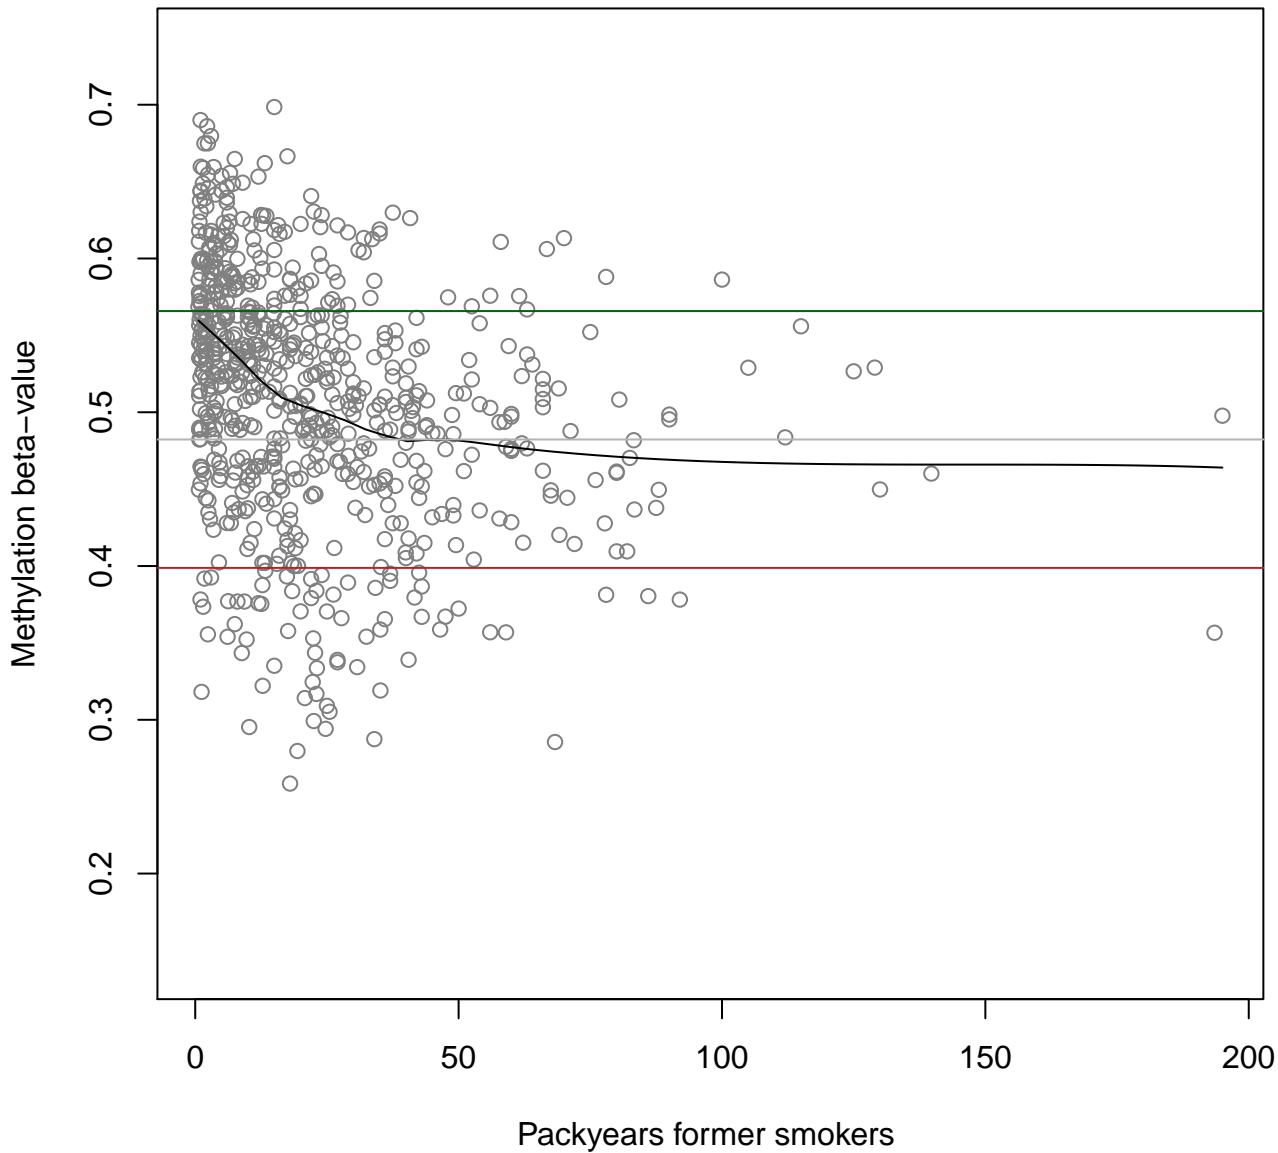

# cg23079012

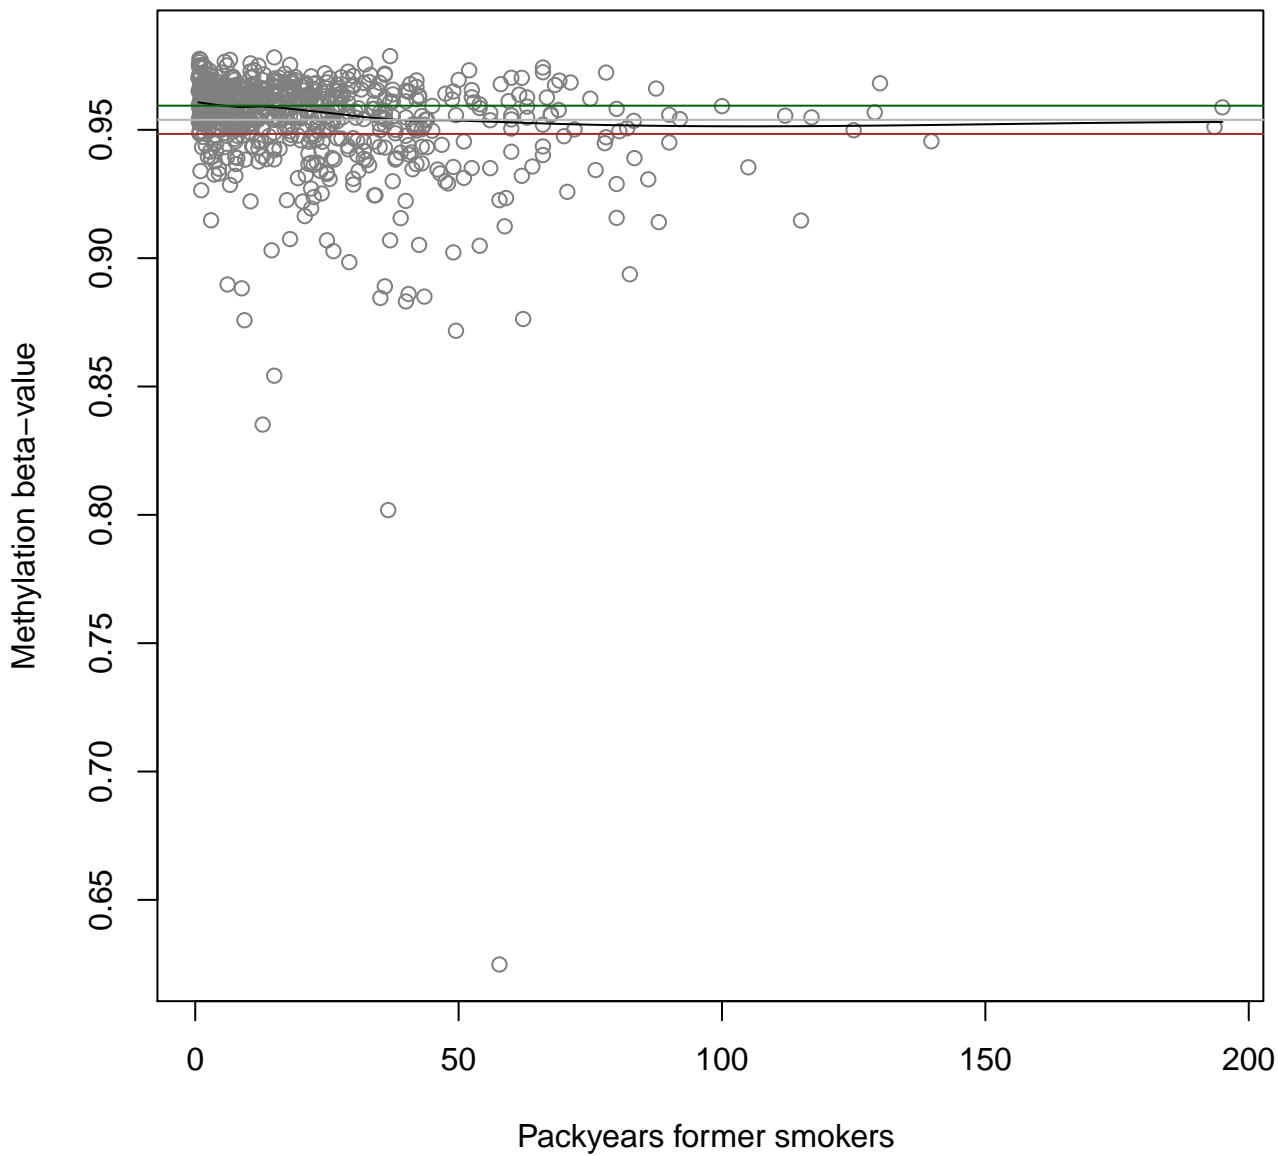

# cg23771366

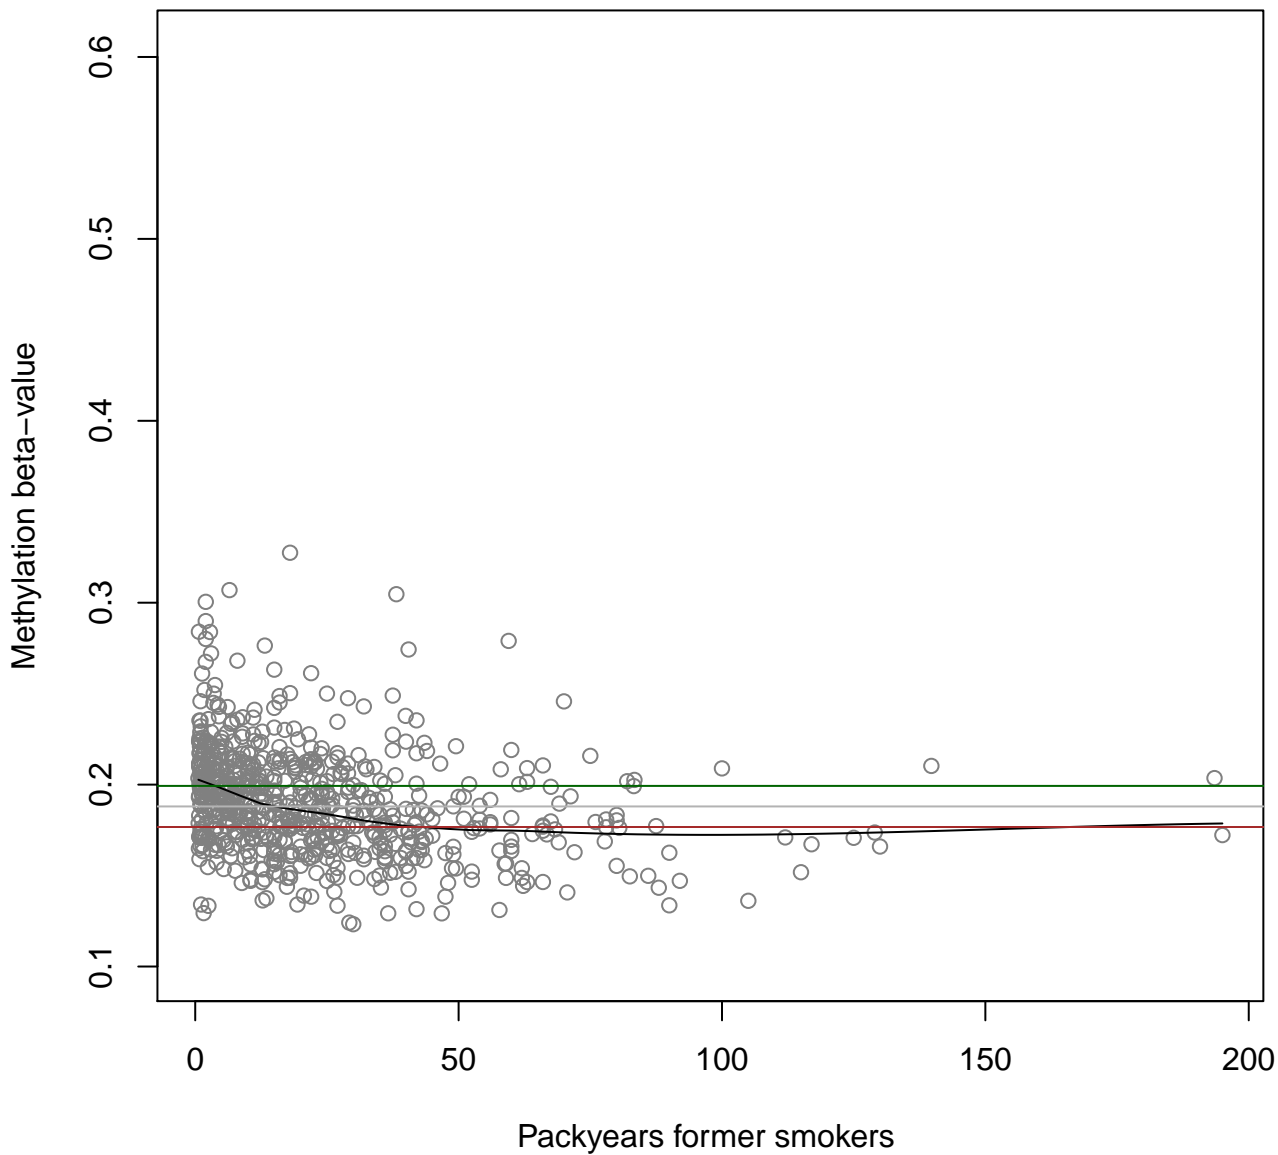

# cg25189904

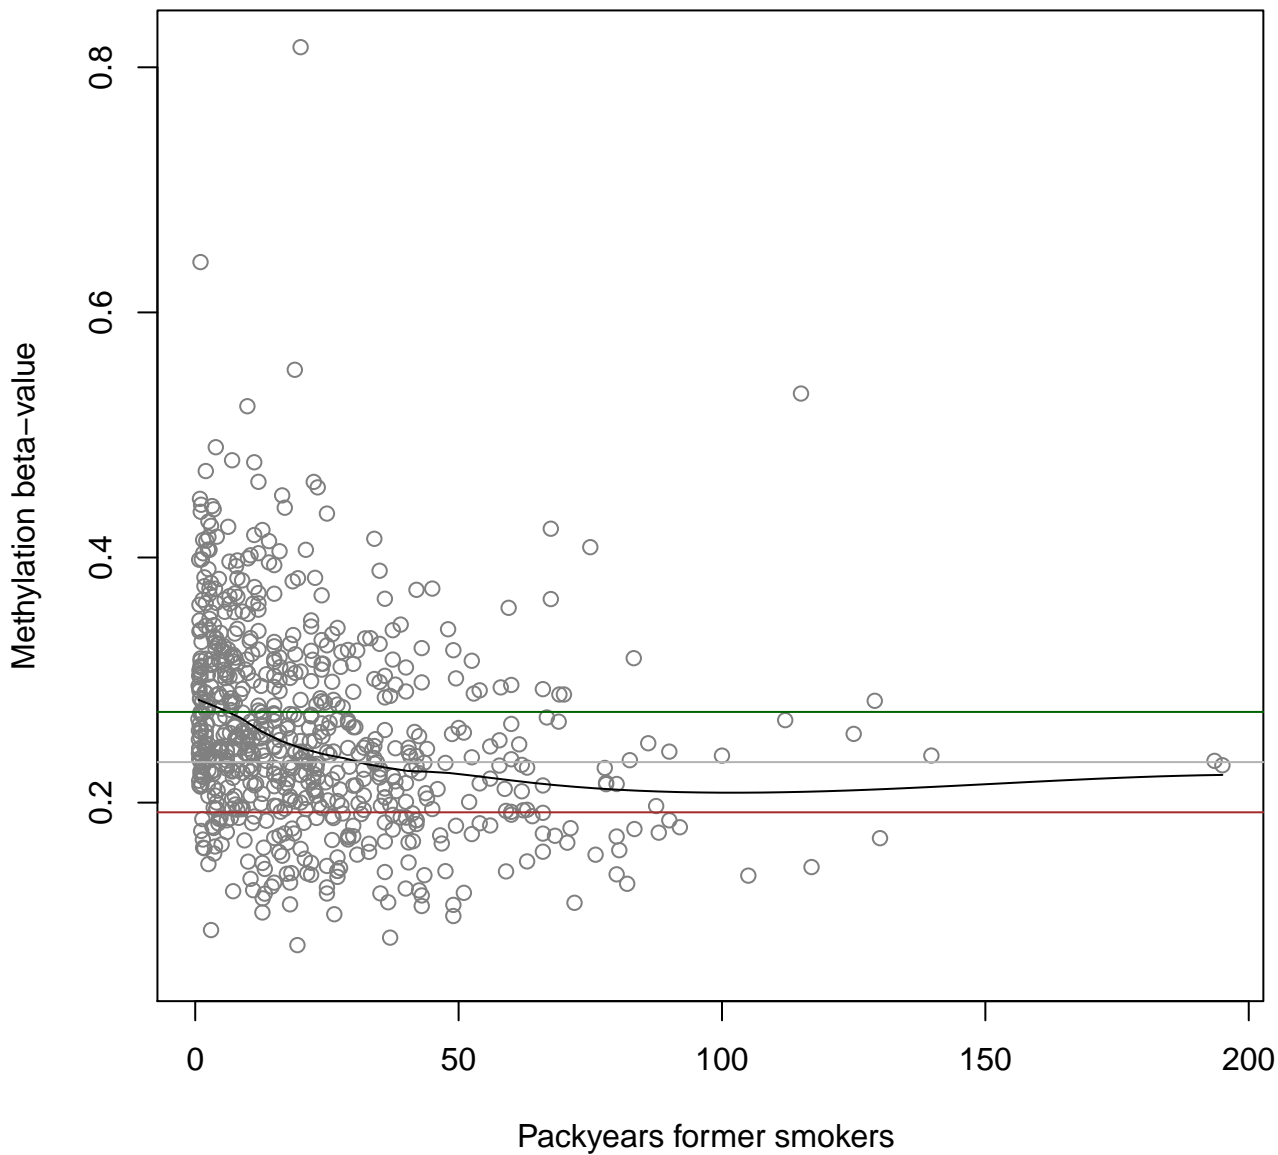

Supplement: pone.0063812.s003.pdf [file pone.0063812.s003.pdf]
