# Supplementary material for: Tobacco Smoking Leads to Extensive Genome-Wide Changes in DNA Methylation
Source: PubMed Central journal article supplement (PMC3656907; doi:10.1371/journal.pone.0063812), 2013-05-17
Supplement: pone.0063812.s014.pdf [file pone.0063812.s014.pdf]

**Box S1. Description of genes that correspond to CpG sites with a methylation difference of more than 5% in current vs. never smokers (in addition to AHRR and ALPP/ALPPL2)**

**HIVEP3:** encodes for the transcription factor human immunodeficiency virus type I enhancer binding protein 3, which strongly inhibits TNF-alpha-induced NF-kappa-B activation and plays a critical role in inflammatory and apoptotic responses [2,3] as well as cell growth [3]. HIVEP3 is induced by T-cell receptor signaling and positively regulates the expression of IL2 in T-cells [6]. Furthermore, it is an essential regulator of adult bone formation [7].

**GNG12:** encodes for the guanine nucleotide binding protein (G protein), gamma 12. G proteins are involved as modulators or transducers in various transmembrane signaling systems and are composed of 3 units, alpha, beta and gamma [8]. The beta and gamma chains are required for the GTPase activity, for replacement of GDP by GTP, and for G protein-effector interaction. GNG12 might be a negative regulator of LPS-induced inflammation [9].

**GFI1:** encodes for the growth factor independent 1 transcription repressor and functions as a transcriptional repressor by controlling histone modifications that lead to silencing of the target gene promoters [10]. It plays a role in various developmental contexts [11], including lymphocyte development and activation [13], and is aberrantly expressed in lung tumors [14]. Gfi-1 plays a critical role both in enhancing Th2 cell expansion and in repressing induction of Th17 and CD103(+) iTreg cells [15].

**CACNA1D:** encodes for calcium channel, voltage-dependent, L type, alpha 1D subunit, also known as Cav1.3. Voltage-gated Ca<sup>2+</sup> channels divert Ca<sup>2+</sup> signals to different cellular processes within different cell types, such as muscle contraction, neurotransmitter release, hormone secretion, gene expression, cell motility, cell division and cell death [18]. Cav1.3 can signal to transcriptional events and induce long lasting alterations of neuronal responsiveness [20,21]. It recently has been shown that CaV1.3 may play a crucial role in osmotic stress-induced Ca<sup>2+</sup> influx and tight junction disruption in the intestinal epithelium [22].

**TIAM2:** encodes for T-cell lymphoma invasion and metastasis 2, which is a guanine nucleotide exchange factor that stimulates the GDP-GTP exchange activity of RHO-like GTPases and activates them. It connects extracellular signals to cytoskeletal activities. The encoded protein may play a role in neural cell development [23,24] and regulate cell migration by microtubule-mediated focal adhesion disassembly [25]. Recently it has been shown that the expression of TIAM2 promotes proliferation and invasion of liver cancer [26].

**MYO1G:** encodes for myosin 1G; is a plasma membrane-associated class I myosin, which is abundant in T and B lymphocytes and mast cells [27,28], and regulates cell elasticity [29].

...

...

**CNTNAP2:** encodes for contactin associated protein-like 2, a member of the neurexin family which functions in the vertebrate nervous system as cell adhesion molecule and receptor. CNTNAP2 has been associated with a wide spectrum of neuropsychiatric disorders such as developmental language and autism spectrum disorders, epilepsy and schizophrenia [1]. Furthermore, it undergoes aberrant methylation in pancreatic adenocarcinoma [4].

**ZC3H3:** encodes for zinc finger CCCH-type containing 3 and regulates mRNA nuclear adenylation and export [5].

**LRP5:** encodes for low density lipoprotein receptor-related protein 5, and binds and internalizes ligands in the process of receptor-mediated endocytosis. LRP5 plays a role in regulating bone mass [12], and development of lung microvessels and alveoli through the angiopoietin-Tie2 pathway [16]. It may play a role in smoke-induced bone loss [17] and contribute to the glucose-induced insulin secretion in the islets [19].

**PCDH9:** encodes for protocadherin 9. Protocadherins are a subfamily of cadherins, a large group of related glycoproteins that mediate calcium-dependent cell-to-cell adhesion via a homophilic mechanism. PCDH9 is localized to the cell membrane and expressed primarily in the brain, and is found in synaptic junctions, where it functions as a neuronal receptor involved in signal transduction and maintaining specific neuronal connections [30]. Expression of PCDH9 is found in hairy cell leukemia [31] and PCDH9 might function as a tumor suppressor during cancer development and progression [32]. PCDH9 might furthermore be a susceptibility locus for Rheumatoid arthritis [33]. Recently, a study characterized intra- and inter-individual methylomic variation across whole blood and multiple regions of the brain from multiple donors and found tissue-specific differentially methylated regions to be significantly enriched near genes involved in functional pathways related to neurodevelopment and neuronal differentiation, including PCDH9 [34].

**RARA:** encodes for retinoic acid receptor, alpha; which regulates the expression of target genes in a ligand-dependent manner and plays a role in acute promyelocytic leukaemia [35], germ cell development during spermatogenesis [36] and CD4+ T Cell Immunity and Homeostasis [37]. It plays an important role in cellular memory and imprinting by regulating the CpG methylation status of specific promoter regions [38].

**LINGO3:** encodes for leucine rich repeat and Ig domain containing 3, which is expressed in a broad but specific pattern in many tissues across the mouse embryo [39].

**F2RL3:** encodes for coagulation factor II (thrombin) receptor-like 3. The F2RL3 protein is relevant for cardiovascular physiology and plays a role in platelet activation [40] and cell signaling [41]. Breitling and co-workers reported an association of *F2RL3* methylation with mortality among patients with stable coronary heart disease [42].

## References for Box S1.

1. Gregor A, Albrecht B, Bader I, Bijlsma EK, Ekici AB, et al. (2011) Expanding the clinical spectrum associated with defects in CNTNAP2 and NRXN1. *BMC Med Genet* 12: 106.
2. Oukka M, Kim ST, Lugo G, Sun J, Wu LC, et al. (2002) A mammalian homolog of *Drosophila* schnurri, KRC, regulates TNF receptor-driven responses and interacts with TRAF2. *Mol Cell* 9: 121-131.
3. Wu LC (2002) ZAS: C2H2 zinc finger proteins involved in growth and development. *Gene Expr* 10: 137-152.
4. Omura N, Li CP, Li A, Hong SM, Walter K, et al. (2008) Genome-wide profiling of methylated promoters in pancreatic adenocarcinoma. *Cancer Biol Ther* 7: 1146-1156.
5. Hurt JA, Obar RA, Zhai B, Farny NG, Gygi SP, et al. (2009) A conserved CCCH-type zinc finger protein regulates mRNA nuclear adenylation and export. *J Cell Biol* 185: 265-277.
6. Oukka M, Wein MN, Glimcher LH (2004) Schnurri-3 (KRC) interacts with c-Jun to regulate the IL-2 gene in T cells. *J Exp Med* 199: 15-24.
7. Jones DC, Wein MN, Glimcher LH (2007) Schnurri-3 is an essential regulator of osteoblast function and adult bone mass. *Ann Rheum Dis* 66 Suppl 3: iii49-51.
8. Hurowitz EH, Melnyk JM, Chen YJ, Kouros-Mehr H, Simon MI, et al. (2000) Genomic characterization of the human heterotrimeric G protein alpha, beta, and gamma subunit genes. *DNA Res* 7: 111-120.
9. Larson KC, Lipko M, Dabrowski M, Draper MP (2010) Gng12 is a novel negative regulator of LPS-induced inflammation in the microglial cell line BV-2. *Inflamm Res* 59: 15-22.
10. Duan Z, Zarebski A, Montoya-Durango D, Grimes HL, Horwitz M (2005) Gfi1 coordinates epigenetic repression of p21Cip/WAF1 by recruitment of histone lysine methyltransferase G9a and histone deacetylase 1. *Mol Cell Biol* 25: 10338-10351.
11. Moroy T (2005) The zinc finger transcription factor Growth factor independence 1 (Gfi1). *Int J Biochem Cell Biol* 37: 541-546.
12. Zhong Z, Williams BO (2012) Integration of cellular adhesion and Wnt signaling: Interactions between N-cadherin and LRP5 and their role in regulating bone mass. *J Bone Miner Res* 27: 1849-1851.
13. Moroy T, Khandanpour C (2011) Growth factor independence 1 (Gfi1) as a regulator of lymphocyte development and activation. *Semin Immunol* 23: 368-378.
14. Kazanjian A, Wallis D, Au N, Nigam R, Venken KJ, et al. (2004) Growth factor independence-1 is expressed in primary human neuroendocrine lung carcinomas and mediates the differentiation of murine pulmonary neuroendocrine cells. *Cancer Res* 64: 6874-6882.
15. Zhu J, Davidson TS, Wei G, Jankovic D, Cui K, et al. (2009) Down-regulation of Gfi-1 expression by TGF-beta is important for differentiation of Th17 and CD103+ inducible regulatory T cells. *J Exp Med* 206: 329-341.
16. Mammoto T, Chen J, Jiang E, Jiang A, Smith LE, et al. (2012) LRP5 regulates development of lung microvessels and alveoli through the angiopoietin-Tie2 pathway. *PLoS One* 7: e41596.
17. Ma D, Li Y, Hackfort B, Zhao Y, Xiao J, et al. (2012) Smoke-induced signal molecules in bone marrow cells from altered low-density lipoprotein receptor-related protein 5 mice. *J Proteome Res* 11: 3548-3560.
18. Yang SN, Berggren PO (2006) The role of voltage-gated calcium channels in pancreatic beta-cell physiology and pathophysiology. *Endocr Rev* 27: 621-676.
19. Fujino T, Asaba H, Kang MJ, Ikeda Y, Sone H, et al. (2003) Low-density lipoprotein receptor-related protein 5 (LRP5) is essential for normal cholesterol metabolism and glucose-induced insulin secretion. *Proc Natl Acad Sci U S A* 100: 229-234.
20. Deisseroth K, Mermelstein PG, Xia H, Tsien RW (2003) Signaling from synapse to nucleus: the logic behind the mechanisms. *Curr Opin Neurobiol* 13: 354-365.
21. Barbado M, Fablet K, Ronjat M, De Waard M (2009) Gene regulation by voltage-dependent calcium channels. *Biochim Biophys Acta* 1793: 1096-1104.
22. Samak G, Narayanan D, Jaggar JH, Rao R (2011) CaV1.3 channels and intracellular calcium mediate osmotic stress-induced N-terminal c-Jun kinase activation and disruption of tight junctions in Caco-2 CELL MONOLAYERS. *J Biol Chem* 286: 30232-30243.
23. Yoshizawa M, Hoshino M, Sone M, Nabeshima Y (2002) Expression of stef, an activator of Rac1, correlates with the stages of neuronal morphological development in the mouse brain. *Mech Dev* 113: 65-68.
24. Matsuo N, Hoshino M, Yoshizawa M, Nabeshima Y (2002) Characterization of STEF, a guanine nucleotide exchange factor for Rac1, required for neurite growth. *J Biol Chem* 277: 2860-2868.
25. Rooney C, White G, Nazgiewicz A, Woodcock SA, Anderson KI, et al. (2010) The Rac activator STEF (Tiam2) regulates cell migration by microtubule-mediated focal adhesion disassembly. *EMBO Rep* 11: 292-298.
26. Chen JS, Su J, Leu YW, Young KC, Sun HS (2012) Expression of T-cell lymphoma invasion and metastasis 2 (TIAM2) promotes proliferation and invasion of liver cancer. *Int J Cancer* 130: 1302-1313.
27. Patino-Lopez G, Aravind L, Dong X, Kruhlak MJ, Ostap EM, et al. (2010) Myosin 1G is an abundant class I myosin in lymphocytes whose localization at the plasma membrane depends on its ancient divergent pleckstrin homology (PH) domain (Myo1PH). *J Biol Chem* 285: 8675-8686.
28. Pierce RA, Field ED, Mutis T, Golovina TN, Von Kap-Herr C, et al. (2001) The HA-2 minor histocompatibility antigen is derived from a diallelic gene encoding a novel human class I myosin protein. *J Immunol* 167: 3223-3230.
29. Olety B, Walte M, Honnert U, Schillers H, Bahler M (2010) Myosin 1G (Myo1G) is a haematopoietic specific myosin that localises to the plasma membrane and regulates cell elasticity. *FEBS Lett* 584: 493-499.
30. Asahina H, Masuba A, Hirano S, Yuri K (2012) Distribution of protocadherin 9 protein in the developing mouse nervous system. *Neuroscience* 225C: 88-104.
31. Basso K, Liso A, Tiacci E, Benedetti R, Pulsoni A, et al. (2004) Gene expression profiling of hairy cell leukemia reveals a phenotype related to memory B cells with altered expression of chemokine and adhesion receptors. *J Exp Med* 199: 59-68.
32. Wang C, Yu G, Liu J, Wang J, Zhang Y, et al. (2012) Downregulation of PCDH9 predicts prognosis for patients with glioma. *J Clin Neurosci* 19: 541-545.
33. Wei Z, Li M (2007) Genome-wide linkage and association analysis of rheumatoid arthritis in a Canadian population. *BMC Proc* 1 Suppl 1: S19.
34. Davies MN, Volta M, Pidsley R, Lunnon K, Dixit A, et al. (2012) Functional annotation of the human brain methylome identifies tissue-specific epigenetic variation across brain and blood. *Genome Biol* 13: R43.
35. Wells RA, Catzavelos C, Kamel-Reid S (1997) Fusion of retinoic acid receptor alpha to NuMA, the nuclear mitotic apparatus protein, by a variant translocation in acute promyelocytic leukaemia. *Nat Genet* 17: 109-113.
36. Doyle TJ, Braun KW, McLean DJ, Wright RW, Griswold MD, et al. (2007) Potential functions of retinoic acid receptor A in Sertoli cells and germ cells during spermatogenesis. *Ann N Y Acad Sci* 1120: 114-130.
37. Hall JA, Cannons JL, Grainger JR, Dos Santos LM, Hand TW, et al. (2011) Essential role for retinoic acid in the promotion of CD4(+) T cell effector responses via retinoic acid receptor alpha. *Immunity* 34: 435-447.
38. Laursen KB, Wong PM, Gudas LJ (2012) Epigenetic regulation by RARalpha maintains ligand-independent transcriptional activity. *Nucleic Acids Res* 40: 102-115.
39. Haines BP, Rigby PW (2008) Expression of the Lingo/LERN gene family during mouse embryogenesis. *Gene Expr Patterns* 8: 79-86.
40. Kahn ML, Nakanishi-Matsui M, Shapiro MJ, Ishihara H, Coughlin SR (1999) Protease-activated receptors 1 and 4 mediate activation of human platelets by thrombin. *J Clin Invest* 103: 879-887.
41. Chen HT, Tsou HK, Tsai CH, Kuo CC, Chiang YK, et al. (2010) Thrombin enhanced migration and MMPs expression of human chondrosarcoma cells involves PAR receptor signaling pathway. *J Cell Physiol* 223: 737-745.
42. Breittling LP, Salzmann K, Rothenbacher D, Burwinkel B, Brenner H (2012) Smoking, F2RL3 methylation, and prognosis in stable coronary heart disease. *Eur Heart J*.
