# Supplementary material for: Tobacco Smoking Leads to Extensive Genome-Wide Changes in DNA Methylation
Source: PLoS One. 2013 May 17;8(5):e63812. doi: 10.1371/journal.pone.0063812 (PMC3656907; doi:10.1371/journal.pone.0063812)
Supplement: Table S2 — Significant differentially-methylated CpG sites of current compared to never smokers discovered in F4 and replicated in F3. Displayed are a) the results of the linear model calculated with M-value adjusted for age, sex, BMI, alcohol and white blood cell count (p-value and explained variance), as well as the median ß-value methylation difference between current and never smokers for the discovery panel (F4) with genome-wide significance (p≤1E-07) and b) the corresponding results of the same CpG sites for the replication panel F3 for comparison (p≤5E-05); (c) the corresponding p-value gained by meta-analysis of F4 and F3; sorted by chromosome and mapinfo (Genome build 37). (XLS) [file pone.0063812.s006.xls]

## Sheet: Sheet1
Table S2. Significant differentially-methylated CpG sites of current compared to never smokers discovered in F4 and replicated in F3.
					a) Discovery Panel (F4)				b) Replication Panel (F3)				c) Meta-analysis		Methylation ß-value as median (first quartile - third quartile)
CpG	Chr.	Mapinfo	Gene		Median ß-value methylation difference in %	p-value	Explained Variance in %		Median ß-value methylation difference in %	p-value	Explained Variance in %		p-value		a) Discovery Panel (F4)			b) Replication Panel (F3)
															Never Smokers	Current Smokers		Never Smokers	Current Smokers
cg09469355	1	2161886	SKI		-1.7622	3.34474e-10	3.26451		-1.6099	2.48232e-07	5.44338		5.71e-16		0.3299 (0.30 - 0.36)	0.3123 (0.28 - 0.34)		0.3021 (0.28 - 0.33)	0.2860 (0.26 - 0.31)
cg08884752	1	2162001	SKI		-4.0125	4.43128e-13	4.30028		-2.8198	1.24902e-05	3.98154		3.036e-17		0.6803 (0.63 - 0.73)	0.6401 (0.59 - 0.69)		0.5889 (0.54 - 0.63)	0.5607 (0.51 - 0.61)
cg12547807	1	9473751	xa		-2.1385	6.5212e-20	6.40902		-1.4614	3.43283e-06	4.43246		2.824e-24		0.1885 (0.16 - 0.22)	0.1672 (0.15 - 0.19)		0.1623 (0.14 - 0.19)	0.1476 (0.13 - 0.17)
cg04885881	1	11123118	xa		-7.4143	1.34798e-28	9.56967		-6.7149	6.62318e-13	9.83049		7.188e-40		0.3115 (0.25 - 0.39)	0.2374 (0.18 - 0.31)		0.2899 (0.24 - 0.36)	0.2228 (0.17 - 0.29)
cg21393163	1	12217629	xa		-0.69344	1.53715e-20	6.85803		-0.68405	9.32603e-06	3.97807		2.554e-24		0.0445 (0.04 - 0.05)	0.0376 (0.03 - 0.05)		0.0572 (0.05 - 0.07)	0.0503 (0.04 - 0.06)
cg21913886	1	15485346	TMEM51		-3.3794	7.25869e-11	3.44722		-3.5057	7.03006e-06	4.05104		2.494e-15		0.8917 (0.86 - 0.92)	0.8579 (0.81 - 0.90)		0.8314 (0.79 - 0.86)	0.7963 (0.74 - 0.84)
cg19713429	1	19810690	CAPZB		-0.44637	1.90367e-16	5.49645		-0.49342	4.52141e-06	3.9233		6.415e-21		0.0987 (0.09 - 0.11)	0.0942 (0.09 - 0.10)		0.0961 (0.09 - 0.11)	0.0912 (0.08 - 0.10)
cg27537125	1	25349681	xa		-1.21415	2.70042e-30	10.4525		-0.73492	4.79387e-10	7.95805		2.071e-38		0.0877 (0.08 - 0.10)	0.0756 (0.07 - 0.09)		0.0840 (0.08 - 0.09)	0.0767 (0.07 - 0.08)
cg15542713	1	42385581	HIVEP3		9.5242	2.54338e-08	2.03056		9.9507	3.64587e-13	9.51466		3.561e-18		0.4002 (0.31 - 0.50)	0.4954 (0.38 - 0.60)		0.3784 (0.30 - 0.46)	0.4779 (0.40 - 0.57)
cg24049493	1	42385941	HIVEP3		4.0531	3.7293e-14	3.76897		3.8345	1.12736e-12	9.15509		1.072e-24		0.1219 (0.10 - 0.15)	0.1624 (0.12 - 0.21)		0.1112 (0.10 - 0.14)	0.1496 (0.12 - 0.18)
cg23090529	1	51442133	xa		-2.2774	9.89783e-11	3.65581		-1.6371	9.51827e-06	4.05514		4.549e-15		0.2061 (0.17 - 0.25)	0.1834 (0.16 - 0.22)		0.1670 (0.15 - 0.19)	0.1506 (0.13 - 0.17)
cg21140898	1	51442318	xa		-3.2754	1.07689e-10	3.54504		-2.6235	1.82598e-05	3.62269		9.331e-15		0.3534 (0.31 - 0.40)	0.3206 (0.28 - 0.37)		0.3454 (0.31 - 0.38)	0.3192 (0.28 - 0.35)
cg19406367	1	66999929	SGIP1		3.1142	2.78828e-08	2.62518		4.5365	4.24609e-06	4.41015		7.037e-13		0.8147 (0.76 - 0.86)	0.8458 (0.80 - 0.89)		0.6663 (0.62 - 0.72)	0.7117 (0.65 - 0.77)
cg25189904	1	68299493	GNG12		-8.1918	1.71407e-39	14.2722		-7.3991	4.13406e-15	11.4165		9.113e-53		0.2740 (0.23 - 0.33)	0.1921 (0.16 - 0.24)		0.2856 (0.24 - 0.33)	0.2116 (0.17 - 0.26)
cg09662411	1	92946132	GFI1		-3.73	8.01207e-09	2.5586		-9.4931	3.75669e-11	8.29055		2.107e-17		0.4805 (0.44 - 0.52)	0.4432 (0.39 - 0.50)		0.5557 (0.49 - 0.63)	0.4608 (0.37 - 0.53)
cg18146737	1	92946700	GFI1		-1.5456	4.78789e-17	4.80036		-2.8745	3.21974e-08	5.85572		9.328e-24		0.9565 (0.95 - 0.96)	0.9410 (0.88 - 0.96)		0.9374 (0.92 - 0.95)	0.9086 (0.83 - 0.94)
cg12876356	1	92946825	GFI1		-8.4781	2.92257e-17	5.45601		-22.6313	6.17701e-18	13.5891		2.466e-32		0.5475 (0.49 - 0.62)	0.4627 (0.37 - 0.55)		0.7010 (0.56 - 0.80)	0.4746 (0.33 - 0.60)
cg18316974	1	92947035	GFI1		-1.863	1.60224e-16	4.43127		-1.7279	6.34428e-10	7.29358		7.283e-25		0.9544 (0.94 - 0.96)	0.9357 (0.90 - 0.96)		0.9496 (0.94 - 0.96)	0.9323 (0.89 - 0.95)
cg09935388	1	92947588	GFI1		-15.309	3.27043e-24	7.38726		-16.4712	3.97994e-26	18.9299		1.259e-46		0.5765 (0.49 - 0.70)	0.4234 (0.32 - 0.54)		0.4757 (0.40 - 0.54)	0.3110 (0.24 - 0.39)
cg11231349	1	162050656	NOS1AP		-1.92	3.93928e-09	2.5141		-3.3428	3.21398e-06	4.23151		7.092e-14		0.8372 (0.79 - 0.87)	0.8180 (0.77 - 0.85)		0.8281 (0.79 - 0.85)	0.7947 (0.74 - 0.85)
cg08709672	1	206224334	AVPR1B		-2.5825	1.93142e-20	7.08609		-2.4444	1.10262e-10	7.83423		1.463e-29		0.6776 (0.66 - 0.70)	0.6518 (0.64 - 0.67)		0.6442 (0.62 - 0.66)	0.6198 (0.60 - 0.64)
cg20295214	1	206226794	AVPR1B		-2.9844	1.13361e-09	2.98617		-4.3648	4.13637e-11	7.93455		2.222e-18		0.8467 (0.82 - 0.87)	0.8169 (0.78 - 0.85)		0.7816 (0.75 - 0.81)	0.7380 (0.71 - 0.78)
cg03547355	1	227003060	xa		-2.758	1.05542e-12	4.75488		-2.2104	1.65174e-06	4.48659		9.097e-18		0.6024 (0.57 - 0.63)	0.5748 (0.53 - 0.61)		0.5325 (0.50 - 0.55)	0.5104 (0.47 - 0.54)
cg17819085	1	235122803	xa		-2.301	6.86953e-08	2.02761		-1.9812	2.52943e-05	3.79324		8.536e-12		0.7041 (0.67 - 0.73)	0.6811 (0.65 - 0.71)		0.6214 (0.59 - 0.64)	0.6016 (0.58 - 0.63)
cg23079012	2	8343710	xa		-1.1011	8.28756e-24	7.15139		-0.9644	1.59232e-11	8.4335		9.514e-34		0.9594 (0.95 - 0.96)	0.9484 (0.93 - 0.96)		0.9578 (0.95 - 0.96)	0.9482 (0.93 - 0.96)
cg06635952	2	70025869	ANXA4		1.9969	2.36645e-21	6.75654		1.3837	4.59383e-09	7.09667		7.878e-29		0.1388 (0.12 - 0.16)	0.1588 (0.14 - 0.18)		0.1239 (0.11 - 0.14)	0.1378 (0.12 - 0.15)
cg26271591	2	178125956	NFE2L2		-5.5731	1.75415e-14	4.91374		-4.7982	8.08349e-09	6.73486		9.433e-22		0.2569 (0.19 - 0.32)	0.2012 (0.15 - 0.26)		0.2535 (0.20 - 0.30)	0.2055 (0.16 - 0.25)
cg23667432	2	233244439	ALPP		-1.5705	1.55085e-11	3.27473		-1.4564	4.58567e-05	3.45503		3.602e-15		0.3401 (0.32 - 0.36)	0.3244 (0.31 - 0.35)		0.3272 (0.30 - 0.35)	0.3127 (0.29 - 0.33)
cg03188382	2	233245886	ALPP		-1.1947	6.7334e-11	3.65577		-1.1502	2.70224e-05	3.59369		8.687e-15		0.2432 (0.23 - 0.26)	0.2313 (0.21 - 0.25)		0.2194 (0.20 - 0.24)	0.2079 (0.19 - 0.23)
cg19713851	2	233246594	ALPP		-6.4717	1.2814e-12	4.78667		-4.4502	6.71819e-06	4.11927		4.465e-17		0.4950 (0.43 - 0.56)	0.4302 (0.37 - 0.50)		0.4462 (0.39 - 0.51)	0.4017 (0.33 - 0.47)
cg27241845	2	233250370	xa		-8.7388	2.79113e-35	10.96		-8.3635	2.06878e-19	13.7843		6.025e-53		0.4617 (0.41 - 0.52)	0.3743 (0.31 - 0.42)		0.4457 (0.41 - 0.49)	0.3621 (0.31 - 0.43)
cg03329539	2	233283329	ALPPL2b		-2.392	3.65858e-59	19.0367		-2.5729	8.33723e-26	19.3601		3.731e-83		0.1598 (0.15 - 0.17)	0.1359 (0.13 - 0.15)		0.1558 (0.14 - 0.17)	0.1301 (0.12 - 0.14)
cg06644428	2	233284112	ALPPL2b		-7.0508	6.36686e-31	12.1439		-3.75382	1.94049e-15	11.753		1.035e-44		0.2142 (0.17 - 0.27)	0.1437 (0.11 - 0.19)		0.1147 (0.08 - 0.15)	0.0772 (0.06 - 0.10)
cg05951221	2	233284402	ALPPL2b		-5.2066	8.91571e-104	31.0716		-4.528	2.05569e-41	27.9996		4.39e-143		0.2199 (0.20 - 0.24)	0.1678 (0.15 - 0.19)		0.1757 (0.16 - 0.19)	0.1304 (0.12 - 0.14)
cg21566642	2	233284661	ALPPL2b		-16.6965	6.90103e-138	36.2442		-15.5755	8.81747e-41	27.1294		7.86e-175		0.5658 (0.51 - 0.61)	0.3988 (0.35 - 0.45)		0.5511 (0.50 - 0.59)	0.3953 (0.31 - 0.44)
cg01940273	2	233284934	ALPPL2b		-7.888	9.28496e-114	31.501		-7.5282	5.46319e-43	28.3253		1.92e-154		0.3437 (0.32 - 0.37)	0.2648 (0.24 - 0.29)		0.2941 (0.27 - 0.31)	0.2189 (0.20 - 0.25)
cg13193840	2	233285289	ALPPL2b		-2.4077	1.52826e-23	8.21056		-1.9091	3.95112e-07	4.84503		9.889e-29		0.1525 (0.13 - 0.17)	0.1285 (0.11 - 0.15)		0.1388 (0.12 - 0.16)	0.1197 (0.10 - 0.14)
cg17024919	3	21792248	ZNF385D		-3.094	4.05578e-09	3.37507		-2.468	2.56629e-05	3.56848		4.811e-13		0.1708 (0.13 - 0.25)	0.1398 (0.10 - 0.21)		0.1593 (0.12 - 0.24)	0.1346 (0.10 - 0.19)
cg15693572	3	22412385	xa		10.8674	3.84406e-14	4.49587		6.9033	1.73533e-06	4.59662		3.694e-19		0.2942 (0.22 - 0.41)	0.4029 (0.29 - 0.53)		0.3159 (0.23 - 0.40)	0.3850 (0.29 - 0.50)
cg23480021	3	22412746	xa		18.6272	2.66602e-22	8.74329		15.7704	1.94971e-10	8.08549		3.629e-31		0.4259 (0.30 - 0.60)	0.6122 (0.44 - 0.78)		0.4266 (0.29 - 0.58)	0.5844 (0.43 - 0.78)
cg03274391	3	22413232	xa		18.0645	1.67417e-25	8.78896		11.9284	3.73814e-10	7.78261		5.474e-34		0.3190 (0.23 - 0.47)	0.4997 (0.34 - 0.70)		0.2872 (0.21 - 0.41)	0.4065 (0.29 - 0.55)
cg00501876	3	39193251	CSRNP1		-4.4316	1.38632e-25	8.7874		-3.1183	4.11862e-06	4.59442		2.709e-29		0.3692 (0.33 - 0.40)	0.3249 (0.30 - 0.36)		0.4298 (0.38 - 0.47)	0.3986 (0.35 - 0.43)
cg18642234	3	49394622	GPX1		-1.6179	1.44471e-12	4.18721		-1.1142	1.41273e-05	3.61167		1.077e-16		0.2316 (0.21 - 0.25)	0.2154 (0.20 - 0.23)		0.2206 (0.21 - 0.24)	0.2095 (0.19 - 0.22)
cg15417641	3	53700141	CACNA1D		7.9159	1.24823e-16	4.90093		5.2791	1.89812e-06	4.61059		1.654e-21		0.6818 (0.58 - 0.76)	0.7610 (0.68 - 0.83)		0.6019 (0.52 - 0.68)	0.6546 (0.60 - 0.73)
cg00336149	3	53700195	CACNA1D		6.4587	1.56516e-12	3.53296		3.7103	4.39837e-06	4.26644		3.541e-17		0.2530 (0.20 - 0.32)	0.3175 (0.25 - 0.39)		0.2315 (0.19 - 0.29)	0.2686 (0.22 - 0.33)
cg21188533	3	53700263	CACNA1D		10.1755	1.12352e-10	3.10428		5.5569	4.38371e-05	3.42034		2.33e-14		0.5724 (0.45 - 0.69)	0.6742 (0.55 - 0.76)		0.5309 (0.41 - 0.63)	0.5865 (0.50 - 0.70)
cg19859270	3	98251294	GPR15		-1.3075	8.99729e-24	8.42177		-1.9446	2.79124e-21	16.1978		2.424e-42		0.9560 (0.95 - 0.96)	0.9430 (0.93 - 0.95)		0.9502 (0.94 - 0.96)	0.9307 (0.92 - 0.95)
cg02657160	3	98311063	CPOX		-1.4812	1.67254e-09	3.35944		-1.3694	3.33572e-06	4.30582		3.014e-14		0.9255 (0.91 - 0.94)	0.9107 (0.88 - 0.93)		0.9111 (0.90 - 0.93)	0.8974 (0.87 - 0.92)
cg25197194	3	128758787	CCDC48		4.6228	5.71461e-10	3.06696		4.8759	8.68796e-06	4.20763		2.418e-14		0.4321 (0.37 - 0.50)	0.4783 (0.42 - 0.55)		0.4084 (0.36 - 0.48)	0.4571 (0.40 - 0.51)
cg08202836	3	196373751	LRRC33		1.5089	3.8507e-08	1.99569		1.853	1.59642e-07	5.70198		6.747e-14		0.8802 (0.85 - 0.90)	0.8952 (0.88 - 0.91)		0.8700 (0.84 - 0.89)	0.8885 (0.87 - 0.91)
cg21121843	4	3203982	HTT		-2.0675	1.7903e-13	4.66065		-1.3157	9.77957e-06	3.9945		9.834e-18		0.1334 (0.11 - 0.16)	0.1127 (0.10 - 0.13)		0.1209 (0.11 - 0.14)	0.1078 (0.09 - 0.13)
cg19719391	4	26789915	xa		4.1802	2.32189e-13	4.35515		3.1426	3.22182e-05	3.53787		4.53e-17		0.5305 (0.48 - 0.57)	0.5723 (0.52 - 0.61)		0.4848 (0.45 - 0.52)	0.5163 (0.47 - 0.55)
cg24556382	4	174173455	GALNT7		-4.2454	2.63807e-10	3.49448		-4.8709	1.09866e-05	3.88379		1.389e-14		0.7934 (0.74 - 0.85)	0.7510 (0.68 - 0.81)		0.7247 (0.67 - 0.77)	0.6760 (0.62 - 0.73)
cg11554391	5	321320	AHRR		-1.03248	5.07258e-24	7.70984		-0.6871	2.72057e-09	6.26788		1.222e-31		0.0911 (0.08 - 0.10)	0.0808 (0.07 - 0.09)		0.0765 (0.07 - 0.08)	0.0696 (0.06 - 0.08)
cg17924476	5	323794	AHRR		5.8036	2.67428e-16	5.7888		3.2526	2.1294e-07	5.39275		3.411e-22		0.2628 (0.23 - 0.30)	0.3208 (0.26 - 0.36)		0.2556 (0.23 - 0.29)	0.2881 (0.25 - 0.33)
cg08606254	5	323969	AHRR		0.7033	9.25309e-09	3.42954		0.6936	6.17829e-07	5.1884		4.259e-14		0.9490 (0.93 - 0.96)	0.9560 (0.94 - 0.97)		0.9440 (0.93 - 0.95)	0.9509 (0.94 - 0.96)
cg12806681	5	368394	AHRR		-2.4357	3.62612e-33	10.3759		-2.4193	2.6046e-17	13.063		8.597e-49		0.9537 (0.94 - 0.96)	0.9293 (0.90 - 0.95)		0.9459 (0.93 - 0.96)	0.9217 (0.89 - 0.94)
cg03991871	5	368447	AHRR		-5.734	4.84433e-41	12.7225		-7.8775	1.22876e-23	17.6077		8.032e-63		0.9469 (0.92 - 0.96)	0.8896 (0.80 - 0.93)		0.9175 (0.89 - 0.94)	0.8387 (0.69 - 0.89)
cg23916896	5	368804	AHRR		-2.1082	9.78786e-29	10.2094		-1.94492	4.13526e-20	15.6233		9.065e-47		0.1286 (0.11 - 0.15)	0.1075 (0.10 - 0.12)		0.1158 (0.10 - 0.13)	0.0964 (0.09 - 0.11)
cg11902777	5	368843	AHRR		-1.11996	4.03907e-40	14.086		-0.94659	1.37689e-17	13.6206		5.48e-56		0.0379 (0.03 - 0.05)	0.0267 (0.02 - 0.03)		0.0410 (0.03 - 0.05)	0.0315 (0.03 - 0.04)
cg01899089	5	369969	AHRR		-2.8583	8.95419e-32	11.2063		-2.2615	2.49074e-13	10.1215		2.048e-43		0.2486 (0.23 - 0.27)	0.2200 (0.20 - 0.24)		0.2381 (0.22 - 0.26)	0.2155 (0.20 - 0.24)
cg05575921	5	373378	AHRR		-24.3991	2.54451e-182	41.0175		-23.2905	1.8067e-64	39.6888		8.7e-244		0.8841 (0.86 - 0.90)	0.6401 (0.60 - 0.73)		0.9028 (0.88 - 0.92)	0.6699 (0.58 - 0.77)
cg26703534	5	377358	AHRR		-6.169	2.14225e-38	10.9037		-5.765	7.82849e-25	17.2086		3.659e-61		0.6269 (0.60 - 0.65)	0.5652 (0.52 - 0.60)		0.6180 (0.60 - 0.63)	0.5603 (0.53 - 0.60)
cg01097768	5	378854	AHRR		-2.402	1.22182e-11	3.73643		-1.8888	5.02059e-07	5.44579		3.446e-17		0.7457 (0.70 - 0.79)	0.7217 (0.67 - 0.76)		0.6593 (0.63 - 0.69)	0.6404 (0.59 - 0.68)
cg14817490	5	392920	AHRR		-3.81225	4.07626e-50	14.4033		-3.1682	2.36937e-19	13.7239		1.451e-67		0.1350 (0.11 - 0.16)	0.0968 (0.08 - 0.12)		0.1327 (0.12 - 0.16)	0.1010 (0.08 - 0.13)
cg25648203	5	395444	AHRR		-7.9626	4.72709e-47	12.9835		-7.5465	2.0339e-23	16.9564		1.011e-68		0.8642 (0.83 - 0.89)	0.7846 (0.72 - 0.84)		0.8473 (0.81 - 0.87)	0.7719 (0.71 - 0.82)
cg21161138	5	399360	AHRR		-10.4479	8.57751e-81	21.6259		-10.6031	1.18555e-40	28.4939		1.49e-119		0.6998 (0.67 - 0.73)	0.5954 (0.53 - 0.65)		0.7304 (0.70 - 0.75)	0.6244 (0.57 - 0.68)
cg03604011	5	400201	AHRR		3.39587	7.86776e-30	9.49207		1.93057	5.65973e-08	6.17699		1.687e-35		0.0759 (0.06 - 0.10)	0.1099 (0.08 - 0.15)		0.0681 (0.05 - 0.08)	0.0874 (0.06 - 0.11)
cg24090911	5	400732	AHRR		-4.0817	3.41393e-14	4.19891		-4.2098	5.68082e-08	5.9698		1.143e-20		0.8246 (0.79 - 0.86)	0.7838 (0.74 - 0.83)		0.7998 (0.76 - 0.84)	0.7577 (0.71 - 0.80)
cg13039251	5	32018601	PDZD2		7.1504	3.80957e-17	5.52793		4.6683	6.23578e-07	4.87185		1.603e-22		0.7536 (0.69 - 0.82)	0.8251 (0.77 - 0.87)		0.7054 (0.64 - 0.77)	0.7521 (0.69 - 0.82)
cg05673882	5	74862702	POLK		-2.6538	4.4888e-23	8.96256		-1.9902	6.02203e-08	5.97271		2.99e-29		0.1515 (0.12 - 0.19)	0.1250 (0.10 - 0.16)		0.1427 (0.12 - 0.17)	0.1228 (0.10 - 0.15)
cg26908328	5	79552537	SERINC5		-0.59522	2.72735e-08	2.76277		-0.64671	1.82664e-06	4.46014		3.363e-13		0.0824 (0.07 - 0.09)	0.0765 (0.07 - 0.09)		0.0783 (0.07 - 0.09)	0.0718 (0.07 - 0.08)
cg16786458	5	149108820	PPARGC1B		2.1641	2.79044e-11	3.23675		1.5695	2.33797e-05	3.61342		3.18e-15		0.1744 (0.16 - 0.20)	0.1960 (0.17 - 0.22)		0.1752 (0.16 - 0.20)	0.1909 (0.17 - 0.22)
cg14580211	5	150161299	C5orf62		-3.909	2.19337e-12	3.93856		-4.612	4.44338e-12	8.85451		3.071e-22		0.6909 (0.65 - 0.73)	0.6519 (0.61 - 0.69)		0.6447 (0.61 - 0.68)	0.5986 (0.55 - 0.64)
cg12513616	5	177370977	xa		-0.873	2.88192e-17	5.54487		-1.1957	6.98673e-08	5.59338		1.24e-23		0.2101 (0.20 - 0.23)	0.2014 (0.19 - 0.21)		0.1823 (0.17 - 0.19)	0.1703 (0.16 - 0.18)
cg01882991	6	6677756	xa		-1.3986	1.74408e-08	3.35529		-1.4928	1.84448e-08	5.69479		5.149e-15		0.6357 (0.62 - 0.66)	0.6217 (0.60 - 0.64)		0.6087 (0.59 - 0.62)	0.5937 (0.58 - 0.61)
cg06126421	6	30720080	xa		-17.0529	1.72487e-75	23.6036		-17.8887	3.72511e-36	24.5832		8.42e-110		0.7724 (0.70 - 0.82)	0.6019 (0.48 - 0.69)		0.6919 (0.63 - 0.74)	0.5131 (0.42 - 0.61)
cg14753356	6	30720108	xa		-5.3664	8.14178e-24	8.57892		-6.4106	2.97663e-23	17.6116		5.896e-44		0.2383 (0.20 - 0.28)	0.1846 (0.15 - 0.22)		0.2451 (0.20 - 0.28)	0.1810 (0.15 - 0.22)
cg24859433	6	30720203	xa		-4.029	3.05829e-41	13.0424		-4.9202	1.1396e-19	14.6494		3.335e-59		0.9322 (0.91 - 0.95)	0.8919 (0.85 - 0.92)		0.8774 (0.85 - 0.90)	0.8282 (0.77 - 0.87)
cg15342087	6	30720209	xa		-3.3572	1.70533e-42	13.5003		-5.4226	2.88957e-27	19.6131		1.186e-67		0.9371 (0.92 - 0.95)	0.9036 (0.87 - 0.93)		0.9067 (0.89 - 0.92)	0.8525 (0.81 - 0.89)
cg17619755	6	31760629	VARS		4.0502	2.64018e-18	5.63778		2.6201	3.32094e-06	4.46609		8.296e-23		0.6519 (0.61 - 0.69)	0.6924 (0.64 - 0.73)		0.6169 (0.59 - 0.65)	0.6431 (0.60 - 0.69)
cg10807309	6	31761062	VARS		1.8323	1.24516e-12	3.46405		2.0099	8.46895e-06	4.04907		5.5e-17		0.1534 (0.13 - 0.18)	0.1717 (0.15 - 0.20)		0.1440 (0.13 - 0.17)	0.1641 (0.13 - 0.20)
cg15474579	6	36645812	CDKN1A		-3.232	9.30052e-09	2.77234		-2.1431	2.93907e-05	3.25868		1.262e-12		0.3563 (0.31 - 0.41)	0.3240 (0.29 - 0.37)		0.2999 (0.27 - 0.33)	0.2784 (0.24 - 0.31)
cg00931843	6	155442993	TIAM2		6.3705	1.6946e-10	2.98065		5.6581	1.08745e-07	5.73413		1.365e-16		0.2963 (0.23 - 0.39)	0.3600 (0.27 - 0.47)		0.3293 (0.25 - 0.42)	0.3859 (0.29 - 0.46)
cg00921574	7	1513873	INTS1		-0.45055	8.71088e-10	2.82179		-0.51612	4.89516e-05	3.04296		1.93e-13		0.1005 (0.09 - 0.11)	0.0960 (0.08 - 0.11)		0.0767 (0.07 - 0.08)	0.0715 (0.07 - 0.08)
cg19717773	7	2847554	GNA12		-4.0493	1.14872e-08	3.14041		-4.1185	1.94635e-05	3.70049		1.072e-12		0.7015 (0.65 - 0.76)	0.6610 (0.60 - 0.72)		0.6278 (0.58 - 0.68)	0.5866 (0.54 - 0.64)
cg02451831	7	26578098	KIAA0087		-2.3023	2.78775e-13	4.22318		-3.1008	1.3532e-09	7.17359		3.458e-21		0.8243 (0.80 - 0.86)	0.8013 (0.76 - 0.83)		0.7564 (0.73 - 0.79)	0.7254 (0.69 - 0.77)
cg08972170	7	30185776	C7orf41		5.329	1.53475e-09	2.69264		4.9483	4.51111e-08	6.04538		7.01e-16		0.5272 (0.47 - 0.59)	0.5805 (0.51 - 0.64)		0.4908 (0.44 - 0.54)	0.5403 (0.48 - 0.60)
cg19089201	7	45002287	MYO1G		1.8564	9.25502e-13	4.20286		2.8719	5.82297e-09	6.63446		4.37e-20		0.9094 (0.88 - 0.93)	0.9280 (0.90 - 0.95)		0.8742 (0.84 - 0.90)	0.9030 (0.87 - 0.93)
cg22132788	7	45002486	MYO1G		6.6794	1.98888e-34	11.0364		5.0201	8.44497e-18	13.6778		1.544e-50		0.8599 (0.81 - 0.90)	0.9267 (0.88 - 0.95)		0.8727 (0.83 - 0.90)	0.9229 (0.88 - 0.95)
cg04180046	7	45002736	MYO1G		2.1692	5.9158e-14	4.32124		2.095	1.33338e-09	7.31618		6.627e-22		0.2316 (0.21 - 0.25)	0.2533 (0.23 - 0.28)		0.1987 (0.18 - 0.22)	0.2196 (0.19 - 0.25)
cg12803068	7	45002919	MYO1G		14.9598	7.08351e-30	10.3376		15.1232	1.03553e-15	12.2947		6.333e-44		0.7382 (0.60 - 0.85)	0.8878 (0.77 - 0.94)		0.7014 (0.60 - 0.81)	0.8527 (0.71 - 0.92)
cg07826859	7	45020086	MYO1G		-5.1247	8.03322e-27	9.11995		-3.7787	5.60179e-10	8.01326		4.658e-35		0.5836 (0.54 - 0.62)	0.5324 (0.48 - 0.57)		0.5631 (0.53 - 0.59)	0.5254 (0.48 - 0.56)
cg03440944	7	45023329	C7orf40		-2.4248	1.6754e-11	3.45361		-1.4201	2.54186e-05	3.66634		2.109e-15		0.7533 (0.72 - 0.78)	0.7290 (0.70 - 0.76)		0.6934 (0.66 - 0.73)	0.6792 (0.64 - 0.71)
cg21322436	7	145812842	CNTNAP2		-4.7443	1.43325e-24	8.79766		-4.4589	5.46822e-10	6.77582		6.486e-33		0.2855 (0.25 - 0.32)	0.2381 (0.21 - 0.27)		0.2849 (0.26 - 0.31)	0.2403 (0.22 - 0.27)
cg25949550	7	145814306	CNTNAP2		-1.37529	4.52584e-29	9.12083		-0.95236	7.21315e-14	10.5014		2.608e-41		0.0852 (0.08 - 0.09)	0.0714 (0.06 - 0.08)		0.0840 (0.08 - 0.09)	0.0745 (0.07 - 0.08)
cg11207515	7	146904205	CNTNAP2		8.2753	2.52948e-10	3.4374		5.2891	2.15886e-07	5.29959		3.768e-16		0.2725 (0.21 - 0.35)	0.3552 (0.27 - 0.44)		0.2166 (0.17 - 0.27)	0.2695 (0.21 - 0.33)
cg17372101	7	147500722	CNTNAP2		7.2277	4.16818e-12	2.97372		4.0941	1.0512e-07	5.06096		2.741e-18		0.3192 (0.27 - 0.38)	0.3915 (0.33 - 0.47)		0.3247 (0.28 - 0.38)	0.3656 (0.32 - 0.42)
cg12276019	8	11057947	XKR6		-0.7689	8.75176e-08	1.92329		-0.82503	1.89407e-05	3.30775		8.515e-12		0.1235 (0.11 - 0.14)	0.1158 (0.10 - 0.14)		0.0974 (0.09 - 0.11)	0.0891 (0.08 - 0.10)
cg24540678	8	28258603	xa		-0.67703	2.29693e-17	6.22784		-0.51217	1.91223e-07	5.3987		2.818e-23		0.0855 (0.08 - 0.09)	0.0787 (0.07 - 0.09)		0.0856 (0.08 - 0.09)	0.0805 (0.07 - 0.09)
cg13518625	8	29522838	xa		-0.49416	1.14741e-13	4.48074		-0.70137	3.45264e-08	6.20582		2.464e-20		0.0565 (0.05 - 0.07)	0.0515 (0.04 - 0.06)		0.0567 (0.05 - 0.06)	0.0497 (0.04 - 0.06)
cg19589396	8	103937374	xa		-3.8603	4.23281e-14	4.8495		-1.8304	2.88828e-05	3.648		8.094e-18		0.7511 (0.71 - 0.80)	0.7125 (0.67 - 0.77)		0.6884 (0.65 - 0.74)	0.6701 (0.62 - 0.71)
cg25305703	8	128378218	xa		-6.0489	2.09487e-08	2.96751		-6.1682	6.16053e-09	6.15615		2.75e-15		0.7103 (0.65 - 0.76)	0.6498 (0.58 - 0.73)		0.6679 (0.62 - 0.71)	0.6062 (0.54 - 0.67)
cg12075928	8	141801307	PTK2		-7.8	1.40011e-18	6.79864		-4.9707	5.27388e-08	6.02797		4.895e-25		0.4672 (0.39 - 0.53)	0.3892 (0.32 - 0.48)		0.4791 (0.41 - 0.54)	0.4294 (0.36 - 0.48)
cg26361535	8	144576604	ZC3H3		-5.536	4.14278e-09	2.83374		-6.3504	4.39286e-07	4.90312		1.351e-14		0.7593 (0.70 - 0.81)	0.7040 (0.63 - 0.77)		0.7442 (0.69 - 0.79)	0.6807 (0.64 - 0.75)
cg13787850	9	102195951	xa		-3.0977	2.13502e-10	2.86975		-3.8308	1.03972e-06	5.05009		1.263e-15		0.2680 (0.21 - 0.33)	0.2370 (0.18 - 0.29)		0.2767 (0.24 - 0.32)	0.2383 (0.19 - 0.29)
cg01692968	9	108005349	xa		-1.4187	7.30068e-11	4.23037		-1.2104	3.32741e-07	4.92741		1.498e-16		0.1619 (0.15 - 0.18)	0.1477 (0.13 - 0.16)		0.1370 (0.12 - 0.15)	0.1249 (0.11 - 0.14)
cg13910681	9	130740599	FAM102A		-0.41431	5.92137e-08	2.28132		-0.39709	1.65034e-05	3.35253		5.024e-12		0.0782 (0.07 - 0.08)	0.0741 (0.07 - 0.08)		0.0737 (0.07 - 0.08)	0.0697 (0.07 - 0.08)
cg22539182	10	850393	xa		1.4125	7.40333e-13	3.54765		0.9348	3.98646e-07	5.27116		1.618e-18		0.1902 (0.18 - 0.20)	0.2044 (0.19 - 0.22)		0.1757 (0.17 - 0.19)	0.1850 (0.17 - 0.20)
cg25953130	10	63753550	ARID5B		-4.6863	6.34071e-10	3.40676		-5.413	2.09354e-07	5.06544		9.719e-16		0.4928 (0.41 - 0.56)	0.4459 (0.36 - 0.52)		0.4823 (0.41 - 0.54)	0.4282 (0.33 - 0.51)
cg27312979	10	97094453	SORBS1		5.0236	2.73928e-16	5.30033		3.8597	1.97823e-06	4.26255		3.65e-21		0.5558 (0.51 - 0.60)	0.6061 (0.57 - 0.65)		0.5413 (0.51 - 0.59)	0.5799 (0.54 - 0.62)
cg25421530	10	97200987	SORBS1		1.5969	4.22371e-09	3.02456		2.7823	1.88359e-06	4.53122		4.78e-14		0.8762 (0.84 - 0.90)	0.8922 (0.86 - 0.92)		0.8117 (0.77 - 0.84)	0.8395 (0.81 - 0.87)
cg01744331	11	2722358	KCNQ1OT1		-1.2068	3.50647e-10	3.11167		-1.3473	4.98461e-08	5.735		1.534e-16		0.9380 (0.93 - 0.95)	0.9259 (0.91 - 0.94)		0.9294 (0.91 - 0.94)	0.9160 (0.90 - 0.93)
cg07123182	11	2722391	KCNQ1OT1		-0.913	8.63955e-13	4.568		-0.8129	3.10524e-09	6.56694		2.355e-20		0.9527 (0.94 - 0.96)	0.9436 (0.93 - 0.95)		0.9479 (0.94 - 0.95)	0.9397 (0.92 - 0.95)
cg16556677	11	2722401	KCNQ1OT1		-3.8405	6.577e-10	3.69591		-3.2855	2.57438e-07	4.91461		1.206e-15		0.8507 (0.81 - 0.88)	0.8123 (0.77 - 0.85)		0.8239 (0.79 - 0.85)	0.7910 (0.74 - 0.83)
cg26963277	11	2722407	KCNQ1OT1		-2.8628	4.51874e-22	8.68367		-1.9345	2.16328e-09	6.77545		7.198e-30		0.9013 (0.88 - 0.92)	0.8726 (0.84 - 0.90)		0.9110 (0.89 - 0.93)	0.8916 (0.86 - 0.91)
cg04039799	11	19745484	NAV2		-1.6233	5.23698e-12	3.95812		-0.7448	2.46424e-05	3.90068		6.639e-16		0.1954 (0.17 - 0.23)	0.1792 (0.16 - 0.20)		0.1845 (0.16 - 0.21)	0.1770 (0.15 - 0.20)
cg09197783	11	57176720	SLC43A3		-3.0429	5.23157e-08	2.83388		-2.5682	1.9894e-06	4.54471		7.266e-13		0.7554 (0.72 - 0.80)	0.7250 (0.69 - 0.76)		0.6918 (0.66 - 0.72)	0.6661 (0.64 - 0.70)
cg16611234	11	58870075	xa		-1.2548	8.30682e-12	3.17905		-0.9808	1.531e-05	3.51141		6.363e-16		0.1449 (0.13 - 0.16)	0.1323 (0.12 - 0.15)		0.1228 (0.11 - 0.13)	0.1130 (0.10 - 0.13)
cg19254163	11	60623782	GPR44		-3.8772	4.82008e-09	3.29551		-2.9197	1.32611e-08	6.03731		9.351e-16		0.5778 (0.54 - 0.61)	0.5390 (0.50 - 0.58)		0.5264 (0.50 - 0.55)	0.4972 (0.46 - 0.53)
cg21611682	11	68138269	LRP5		-5.2424	1.09214e-18	6.50073		-5.3765	3.15995e-20	14.1277		9.897e-36		0.5276 (0.50 - 0.56)	0.4752 (0.43 - 0.52)		0.4844 (0.46 - 0.51)	0.4306 (0.40 - 0.47)
cg14624207	11	68142198	LRP5		-5.1484	2.93645e-12	3.76964		-3.591	5.74332e-10	7.03871		2.105e-20		0.4747 (0.44 - 0.51)	0.4233 (0.37 - 0.47)		0.4327 (0.40 - 0.47)	0.3968 (0.36 - 0.43)
cg01901332	11	75031054	ARRB1		-5.066	1.69765e-09	3.56974		-4.335	5.57113e-12	8.9837		8.351e-19		0.6741 (0.63 - 0.72)	0.6234 (0.57 - 0.68)		0.6406 (0.61 - 0.68)	0.5972 (0.55 - 0.64)
cg11660018	11	86510915	PRSS23		-3.8747	1.28818e-22	6.87647		-2.9625	5.87535e-13	9.21746		6.253e-34		0.2926 (0.27 - 0.32)	0.2538 (0.23 - 0.28)		0.2608 (0.24 - 0.28)	0.2312 (0.21 - 0.25)
cg23771366	11	86510998	PRSS23		-2.2552	7.61873e-20	7.05089		-1.7865	5.86447e-09	6.36514		2.974e-27		0.1993 (0.18 - 0.22)	0.1767 (0.16 - 0.19)		0.1859 (0.17 - 0.20)	0.1680 (0.15 - 0.18)
cg03234777	11	118095544	AMICA1		-0.69317	5.15744e-15	5.03412		-0.56123	7.93164e-06	4.07758		2.679e-19		0.0561 (0.05 - 0.07)	0.0492 (0.04 - 0.06)		0.0626 (0.06 - 0.07)	0.0570 (0.05 - 0.06)
cg26282236	12	1025755	RAD52		2.457	8.23608e-08	2.58467		3.6488	1.65691e-05	3.87678		7.113e-12		0.5699 (0.52 - 0.63)	0.5945 (0.55 - 0.65)		0.4957 (0.44 - 0.55)	0.5322 (0.49 - 0.59)
cg02583484	12	54677008	HNRNPA1		-2.0898	7.09724e-20	6.72257		-1.7723	1.89901e-08	6.35075		9.379e-27		0.1476 (0.12 - 0.18)	0.1267 (0.11 - 0.15)		0.1380 (0.12 - 0.16)	0.1203 (0.10 - 0.14)
cg04158018	12	54696210	NFE2		-1.2475	8.40119e-08	2.41191		-1.2063	1.38259e-05	3.89136		6.207e-12		0.1587 (0.13 - 0.19)	0.1462 (0.13 - 0.17)		0.1395 (0.12 - 0.16)	0.1275 (0.11 - 0.14)
cg23681440	13	27498239	xa		-1.3088	1.11825e-08	2.91701		-2.6755	7.98233e-07	5.04268		6.465e-14		0.2499 (0.21 - 0.30)	0.2368 (0.20 - 0.28)		0.2537 (0.22 - 0.29)	0.2270 (0.19 - 0.27)
cg23126342	13	67801125	PCDH9		9.11	7.16129e-14	4.38388		7.5574	2.73248e-08	6.20178		1.226e-20		0.5136 (0.43 - 0.60)	0.6047 (0.52 - 0.67)		0.4865 (0.39 - 0.57)	0.5621 (0.46 - 0.64)
cg25491122	13	67801551	PCDH9		2.361	1.48727e-08	2.57827		2.4624	2.17223e-05	3.58416		1.543e-12		0.9053 (0.86 - 0.93)	0.9289 (0.90 - 0.95)		0.8605 (0.80 - 0.90)	0.8851 (0.84 - 0.91)
cg06885459	13	113689728	MCF2L		4.8836	2.09085e-11	2.70386		3.0119	4.90611e-05	3.26681		5.15e-15		0.3917 (0.34 - 0.44)	0.4406 (0.39 - 0.50)		0.3839 (0.34 - 0.43)	0.4140 (0.37 - 0.46)
cg17487894	13	114817820	RASA3		2.8007	4.71721e-10	3.64788		2.6292	2.48568e-05	3.66433		5.434e-14		0.4107 (0.36 - 0.45)	0.4387 (0.40 - 0.48)		0.3790 (0.33 - 0.42)	0.4053 (0.36 - 0.43)
cg01731783	14	74211788	C14orf43		-2.0523	3.47633e-11	3.84746		-1.6429	3.76167e-05	3.74994		6.389e-15		0.6572 (0.63 - 0.69)	0.6366 (0.60 - 0.67)		0.6395 (0.62 - 0.66)	0.6231 (0.60 - 0.65)
cg22851561	14	74214183	C14orf43		-6.0595	5.46569e-21	7.58154		-3.596	4.60385e-09	7.02544		1.778e-28		0.4718 (0.41 - 0.52)	0.4112 (0.36 - 0.48)		0.4375 (0.40 - 0.49)	0.4015 (0.35 - 0.46)
cg24996979	14	74223355	C14orf43		-0.55845	6.8366e-25	9.75522		-0.48017	2.27064e-08	6.37144		1.958e-31		0.0802 (0.07 - 0.09)	0.0746 (0.07 - 0.08)		0.0813 (0.08 - 0.09)	0.0765 (0.07 - 0.08)
cg10919522	14	74227441	C14orf43		-0.8884	6.20382e-17	5.30182		-0.6104	2.4649e-05	3.46287		1.595e-20		0.1323 (0.12 - 0.15)	0.1234 (0.11 - 0.14)		0.1256 (0.11 - 0.14)	0.1195 (0.11 - 0.13)
cg13976502	14	74227875	C14orf43		-1.0101	4.67284e-16	5.64385		-0.9629	3.85969e-05	3.39747		1.73e-19		0.2701 (0.25 - 0.29)	0.2600 (0.24 - 0.28)		0.3003 (0.28 - 0.33)	0.2906 (0.27 - 0.31)
cg13038618	14	77467391	xa		-4.4855	1.85746e-10	3.58816		-5.3384	3.24845e-08	5.87113		5.406e-17		0.4082 (0.35 - 0.46)	0.3633 (0.29 - 0.42)		0.4037 (0.36 - 0.45)	0.3503 (0.29 - 0.41)
cg05875421	14	91709951	GPR68		-0.52389	2.1455e-14	4.60212		-0.44131	3.6256e-07	5.31881		4.315e-20		0.0755 (0.07 - 0.08)	0.0703 (0.06 - 0.08)		0.0665 (0.06 - 0.07)	0.0621 (0.06 - 0.07)
cg05284742	14	93552128	ITPK1		-3.7647	3.56595e-09	3.01628		-4.32	1.48189e-10	7.76891		2.184e-17		0.7424 (0.71 - 0.78)	0.7048 (0.66 - 0.74)		0.6985 (0.67 - 0.73)	0.6553 (0.63 - 0.69)
cg06819357	14	102928437	TECPR2		5.6982	4.81371e-11	2.92998		2.283	1.32442e-05	3.76896		3.075e-15		0.6637 (0.62 - 0.72)	0.7207 (0.67 - 0.77)		0.5934 (0.55 - 0.62)	0.6162 (0.58 - 0.65)
cg26242531	14	104190678	ZFYVE21		4.0245	1.37234e-15	5.03557		3.284	2.00642e-07	5.52996		1.591e-21		0.2288 (0.19 - 0.27)	0.2690 (0.24 - 0.31)		0.2211 (0.19 - 0.26)	0.2539 (0.22 - 0.29)
cg11730703	14	105167607	INF2		2.0642	2.03804e-10	2.76123		1.2263	8.20585e-06	4.06381		8.121e-15		0.7804 (0.75 - 0.81)	0.8010 (0.77 - 0.83)		0.8144 (0.78 - 0.84)	0.8266 (0.80 - 0.86)
cg01208318	14	106329652	xa		-7.7353	2.53588e-12	4.1543		-6.2008	1.2012e-05	3.58915		1.569e-16		0.2836 (0.20 - 0.37)	0.2063 (0.16 - 0.28)		0.2246 (0.15 - 0.30)	0.1626 (0.12 - 0.23)
cg15022400	15	45028161	TRIM69		-0.73282	3.35809e-13	3.94239		-0.69752	1.2185e-06	4.52075		2.17e-18		0.0804 (0.07 - 0.09)	0.0731 (0.06 - 0.08)		0.0842 (0.08 - 0.09)	0.0773 (0.07 - 0.09)
cg03489965	15	65368982	LOC390594		2.6597	9.51663e-15	4.81282		2.4604	4.23006e-05	3.4337		3.099e-18		0.2217 (0.19 - 0.25)	0.2483 (0.22 - 0.30)		0.2349 (0.21 - 0.28)	0.2595 (0.22 - 0.33)
cg18335991	15	74724562	SEMA7A		-3.9404	4.90348e-13	4.40065		-2.9988	4.52655e-07	5.19167		1.208e-18		0.6581 (0.60 - 0.71)	0.6187 (0.55 - 0.67)		0.5936 (0.55 - 0.64)	0.5636 (0.52 - 0.61)
cg00310412	15	74724918	SEMA7A		-1.9653	2.33728e-13	5.17267		-2.6213	6.09698e-11	8.25681		2.088e-22		0.2994 (0.27 - 0.32)	0.2797 (0.25 - 0.31)		0.2711 (0.25 - 0.30)	0.2449 (0.23 - 0.27)
cg11152412	15	74927688	EDC3		-0.30474	1.36939e-11	3.59259		-0.33866	6.16175e-06	4.13751		4.187e-16		0.0522 (0.05 - 0.06)	0.0492 (0.04 - 0.05)		0.0633 (0.06 - 0.07)	0.0599 (0.05 - 0.07)
cg23161492	15	90357202	ANPEP		-1.5956	1.1243e-24	8.24231		-1.52214	2.15347e-12	9.18113		1.8e-35		0.1212 (0.11 - 0.13)	0.1053 (0.10 - 0.12)		0.1142 (0.10 - 0.13)	0.0989 (0.09 - 0.11)
cg05194346	15	101305443	xa		9.9753	3.36364e-22	7.02253		4.8933	1.42595e-05	3.77171		1.419e-25		0.3928 (0.32 - 0.48)	0.4926 (0.41 - 0.57)		0.4374 (0.36 - 0.50)	0.4863 (0.43 - 0.54)
cg01207684	16	4103167	ADCY9		-1.8306	6.28585e-10	2.76649		-3.4185	1.75928e-07	5.08141		8.304e-16		0.7670 (0.73 - 0.80)	0.7487 (0.70 - 0.78)		0.7476 (0.72 - 0.78)	0.7134 (0.68 - 0.75)
cg09099830	16	30485485	ITGAL		-1.7213	1.54635e-24	7.62829		-2.5657	3.22874e-07	5.15252		9.496e-30		0.5947 (0.57 - 0.62)	0.5775 (0.55 - 0.60)		0.6128 (0.59 - 0.64)	0.5871 (0.56 - 0.62)
cg03155159	16	59627519	xa		-1.1892	9.31317e-08	2.64954		-2.719	3.90673e-05	3.2775		1.719e-11		0.3190 (0.24 - 0.39)	0.3071 (0.23 - 0.36)		0.3001 (0.26 - 0.35)	0.2729 (0.22 - 0.32)
cg00911794	17	1962132	HIC1		4.6004	6.83966e-10	2.05356		1.9861	7.88937e-06	3.38944		2.65e-14		0.2870 (0.25 - 0.35)	0.3330 (0.27 - 0.40)		0.2034 (0.17 - 0.25)	0.2233 (0.18 - 0.28)
cg23621097	17	1962236	HIC1		3.4679	4.2299e-08	1.89725		1.8342	2.40173e-05	3.12179		4.939e-12		0.2768 (0.23 - 0.33)	0.3115 (0.25 - 0.38)		0.1906 (0.16 - 0.24)	0.2090 (0.17 - 0.27)
cg09858022	17	38465333	RARA		1.2032	5.46307e-08	2.6902		1.042	2.05564e-05	3.79935		5.605e-12		0.3923 (0.36 - 0.42)	0.4043 (0.38 - 0.43)		0.3709 (0.35 - 0.39)	0.3813 (0.36 - 0.40)
cg19572487	17	38476024	RARA		-10.0183	9.37079e-40	14.0233		-7.8054	7.56307e-15	11.9206		9.85e-53		0.4477 (0.40 - 0.51)	0.3475 (0.30 - 0.43)		0.4502 (0.40 - 0.51)	0.3722 (0.31 - 0.44)
cg04956244	17	38511592	RARA		2.4992	3.43666e-10	3.63684		1.5855	4.29304e-06	4.40146		7.496e-15		0.5979 (0.57 - 0.63)	0.6229 (0.59 - 0.65)		0.5706 (0.55 - 0.59)	0.5865 (0.57 - 0.61)
cg16255816	17	39889811	HAP1		-0.5727	9.19139e-11	3.63313		-0.8999	2.66557e-05	3.59139		1.162e-14		0.1406 (0.13 - 0.15)	0.1348 (0.12 - 0.14)		0.1392 (0.13 - 0.15)	0.1302 (0.12 - 0.14)
cg03373393	17	39890193	HAP1		-0.34346	1.38142e-11	3.81613		-0.40104	2.93667e-05	3.36747		2.029e-15		0.0849 (0.08 - 0.09)	0.0814 (0.07 - 0.09)		0.0763 (0.07 - 0.08)	0.0723 (0.07 - 0.08)
cg25809905	17	42467728	ITGA2B		6.5291	2.74143e-12	3.58141		3.8698	1.64103e-06	4.63739		2.335e-17		0.5129 (0.44 - 0.58)	0.5782 (0.52 - 0.64)		0.5170 (0.47 - 0.57)	0.5557 (0.51 - 0.61)
cg21280392	17	47304116	PHOSPHO1		2.3682	1.5604e-08	2.73767		1.1379	3.35192e-06	4.03135		3.112e-13		0.2667 (0.24 - 0.29)	0.2903 (0.27 - 0.32)		0.2527 (0.24 - 0.27)	0.2641 (0.25 - 0.29)
cg07465627	17	53167407	STXBP4		-1.3756	3.66811e-12	4.57282		-1.4603	6.45211e-06	4.18883		1.198e-16		0.1802 (0.16 - 0.21)	0.1665 (0.15 - 0.19)		0.1617 (0.15 - 0.18)	0.1471 (0.13 - 0.17)
cg02186444	17	73120977	ARMC7		3.82	4.67224e-16	5.06152		3.008	1.9536e-08	6.78747		5.486e-23		0.5410 (0.50 - 0.58)	0.5792 (0.53 - 0.61)		0.5200 (0.48 - 0.56)	0.5501 (0.52 - 0.58)
cg07251887	17	73641809	LOC100130933		-5.1337	5.60731e-09	3.52475		-2.9392	1.63661e-07	5.29673		8.262e-15		0.3329 (0.29 - 0.38)	0.2816 (0.24 - 0.32)		0.3216 (0.29 - 0.35)	0.2922 (0.25 - 0.32)
cg06459104	18	5456880	EPB41L3		-5.4507	1.77529e-10	3.67629		-4.6963	2.10755e-07	5.32868		2.54e-16		0.2918 (0.21 - 0.38)	0.2373 (0.17 - 0.32)		0.2842 (0.22 - 0.35)	0.2372 (0.17 - 0.31)
cg00073090	19	1265879	xa		-0.2628	9.10169e-14	3.31533		-0.9035	6.1712e-08	4.84433		3.34e-20		0.1727 (0.16 - 0.18)	0.1701 (0.16 - 0.18)		0.1440 (0.13 - 0.15)	0.1350 (0.13 - 0.14)
cg15187398	19	2093896	MOBKL2A		-2.7521	8.511e-09	3.00134		-1.765	6.67618e-07	4.88197		4.153e-14		0.2507 (0.22 - 0.28)	0.2232 (0.20 - 0.25)		0.2113 (0.19 - 0.23)	0.1937 (0.18 - 0.21)
cg07381806	19	2094327	MOBKL2A		-5.1181	3.46162e-17	7.12093		-4.2724	4.73936e-06	4.72989		1.369e-21		0.4132 (0.36 - 0.47)	0.3621 (0.30 - 0.42)		0.3898 (0.36 - 0.42)	0.3471 (0.30 - 0.40)
cg00835193	19	2291780	LINGO3		-8.2285	2.43954e-08	2.25838		-11.6612	4.39814e-07	5.01076		9.197e-14		0.8822 (0.75 - 0.93)	0.7999 (0.61 - 0.92)		0.8938 (0.77 - 0.94)	0.7772 (0.59 - 0.91)
cg03636183	19	17000585	F2RL3		-14.7441	2.42277e-80	22.4465		-17.6258	1.64983e-39	26.9418		5.58e-118		0.4930 (0.45 - 0.54)	0.3456 (0.28 - 0.43)		0.5152 (0.47 - 0.56)	0.3390 (0.28 - 0.43)
cg15159987	19	17003890	CPAMD8		-3.5338	6.38534e-15	4.61784		-2.2744	1.32679e-06	4.77172		4.904e-20		0.6339 (0.59 - 0.67)	0.5986 (0.56 - 0.64)		0.6090 (0.57 - 0.64)	0.5863 (0.55 - 0.61)
cg23973524	19	18873222	CRTC1		4.2136	1.23067e-25	6.59467		2.1603	1.0587e-06	4.65413		4.177e-30		0.3062 (0.28 - 0.34)	0.3483 (0.32 - 0.38)		0.2886 (0.26 - 0.32)	0.3102 (0.28 - 0.35)
cg11902728	19	35786580	MAG		5.756	4.05098e-13	1.30953		1.389	4.40841e-05	1.78659		1.08e-16		0.3524 (0.32 - 0.42)	0.4100 (0.35 - 0.46)		0.3680 (0.31 - 0.42)	0.3818 (0.33 - 0.43)
cg22649124	19	39282077	LGALS7B		-0.7107	1.15455e-09	2.97011		-0.54374	4.31695e-05	3.3734		2.254e-13		0.1161 (0.10 - 0.13)	0.1090 (0.10 - 0.12)		0.1012 (0.09 - 0.11)	0.0957 (0.09 - 0.11)
cg11701312	19	58897497	RPS5		-1.4144	3.40418e-10	3.71156		-1.1572	2.72294e-05	3.66467		4.3e-14		0.3002 (0.28 - 0.32)	0.2861 (0.27 - 0.31)		0.2918 (0.27 - 0.31)	0.2802 (0.26 - 0.29)
cg16201146	20	19191526	xa		-3.5737	7.90851e-14	4.31899		-3.5483	5.75365e-07	4.6421		2.476e-19		0.6390 (0.57 - 0.72)	0.6033 (0.55 - 0.68)		0.5935 (0.54 - 0.65)	0.5580 (0.49 - 0.61)
cg07339236	20	50312490	ATP9A		-1.10312	1.56705e-21	7.4306		-0.82823	5.04215e-16	12.2905		1.565e-35		0.0828 (0.07 - 0.09)	0.0717 (0.06 - 0.08)		0.0707 (0.07 - 0.08)	0.0624 (0.06 - 0.07)
cg00871610	21	37093012	MIR802		-4.3308	5.45519e-08	2.70628		-3.8931	1.12681e-07	5.49502		7.573e-14		0.5267 (0.47 - 0.57)	0.4834 (0.42 - 0.54)		0.4496 (0.41 - 0.48)	0.4107 (0.36 - 0.46)
cg06595162	21	40141040	NCRNA00114		-2.7056	2.64851e-08	2.72271		-2.288	3.88243e-06	3.85217		6.173e-13		0.8358 (0.80 - 0.86)	0.8088 (0.77 - 0.84)		0.7731 (0.75 - 0.80)	0.7503 (0.72 - 0.78)
cg23110422	21	40182073	ETS2		-3.6816	1.72013e-16	5.90759		-3.6001	2.53657e-07	5.28561		2.658e-22		0.9005 (0.87 - 0.92)	0.8637 (0.82 - 0.90)		0.8547 (0.82 - 0.88)	0.8187 (0.78 - 0.86)
cg22635096	21	46550644	ADARB1		3.3599	5.80772e-11	3.33129		2.6395	7.60085e-06	3.98783		2.153e-15		0.2511 (0.20 - 0.30)	0.2847 (0.23 - 0.36)		0.2046 (0.18 - 0.25)	0.2310 (0.20 - 0.26)
cg02532700	22	37257404	NCF4		-1.15296	1.87901e-16	6.27755		-0.93669	1.06983e-07	5.87871		1.198e-22		0.0924 (0.08 - 0.11)	0.0809 (0.07 - 0.10)		0.1014 (0.09 - 0.12)	0.0920 (0.08 - 0.10)
cg01127300	22	38614796	xa		-3.8336	3.07541e-16	6.2239		-3.8713	7.03746e-06	3.74535		1.651e-20		0.4576 (0.40 - 0.51)	0.4193 (0.34 - 0.48)		0.4485 (0.39 - 0.51)	0.4098 (0.35 - 0.47)
Displayed are a) the results of the linear model calculated with M-value adjusted for age, sex, BMI, alcohol and white blood cell count (p-value and explained variance), as well as the median ß-value methylation difference between current and never smokers for the discovery
panel (F4) with genome-wide significance (p ≤ 1E-07) and b) the corresponding results of the same CpG sites for the replication panel F3 for comparison (significance level ≤ 5E-05); (c) the corresponding p-value gained by meta-analysis of F4 and F3; sorted by
chromosome and mapinfo (Genome build 37). a According to UCSC Genome Browser no annotated transcripts are associated with these CpG sites; b According to UCSC Genome Browser no annotated transcripts are associated with these CpG sites, but SNPs within the
same region (shore of a CpG Island) have a predicted function on the ALPPL2 gene, which is located several kb apart from this CpG island.
