# Supplementary material for: Tobacco Smoking Leads to Extensive Genome-Wide Changes in DNA Methylation
Source: PLoS One. 2013 May 17;8(5):e63812. doi: 10.1371/journal.pone.0063812 (PMC3656907; doi:10.1371/journal.pone.0063812)
Supplement: Table S9 — Sequences of PCR tagged primers used for EpiTYPER methylation analysis, product size of each amplicon and informative CpG sites per amplicon. (XLS) [file pone.0063812.s013.xls]

## Sheet: Tabelle1
Table S9. Sequences of PCR tagged primers used for EpiTYPER methylation analysis, product size of each amplicon and informative CpG sites per amplicon.
Amplicon	Primer	Sequence	Product size (bp)	Total No. of CpG sites in amplicon	No. of analysed CpG sites per amplicon*
					Single	Composite
AHRR	forward	aggaagagagAGAGAGGGGTTTTGTTAGGATTATT	389	15	6	8
	revers	cagtaatacgactcactatagggagaaggctAAACCACTCTACTCCAACCCTTACT
ALPP/ALPPL2	forward	aggaagagagGAGGATAGGGGAGAAGATTTTATTG	276	18	4	6
	revers	cagtaatacgactcactatagggagaaggctTACAACCCTAAACCACCTAAACTAT		35
F2RL3	forward	aggaagagagTTGTGTTAATGATAGTGATATTTTGGAG	452	30	7	10
	revers	cagtaatacgactcactatagggagaaggctCCATAAACCAAACAACCATACAAA
*The total no. of total informative CpG sites in the amplicon is divided into single CpG sites and composite sites (two or more adjacent CpG sites fall within one fragment, or
when fragment masses are overlapping).
